# Supplementary material for: A copper-catalyzed asymmetric oxime propargylation enables the synthesis of the gliovirin tetrahydro-1,2-oxazine core
Source: Royal Society of Chemistry journal article supplement (doi:10.1039/d0sc04802j), 2020-01-01

# Copper-catalyzed asymmetric oxime propargylation: enables the synthesis of the gliovirin tetrahydro-1,2-oxazine core

Nicholas G.W. Cowper, Matthew J. Hess, Katie M. Chan, and Sarah E. Reisman\*

*The Warren and Katharine Schlinger Laboratory of Chemistry and Chemical Engineering*

*Division of Chemistry and Chemical Engineering, California Institute of Technology, Pasadena, California 91125*

## SUPPORTING INFORMATION

### TABLE OF CONTENTS

Page

|                                                         |     |
|---------------------------------------------------------|-----|
| 1. General Methods and Materials                        | S2  |
| 2. Synthetic Procedures                                 | S4  |
| 3. Single Crystal X-ray Diffraction Data                | S25 |
| 4. <sup>1</sup> H and <sup>13</sup> C NMR Spectral Data | S36 |

## 1. General Methods and Materials

Unless otherwise stated, reactions were performed under a nitrogen atmosphere using freshly dried solvents. Tetrahydrofuran (THF), methylene chloride ( $\text{CH}_2\text{Cl}_2$ ), acetonitrile (MeCN), dimethylformamide (DMF), benzene (PhH), diethyl ether ( $\text{Et}_2\text{O}$ ) and toluene (PhMe) were dried by passing through activated alumina columns. Unless otherwise stated, chemicals and reagents were used as received. Triethylamine ( $\text{Et}_3\text{N}$ ) was distilled over calcium hydride prior to use. All reactions were monitored by thin-layer chromatography using EMD/Merck silica gel 60 F254 pre-coated plates (0.25 mm) and were visualized by UV, *p*-anisaldehyde, vanillan, CAM or  $\text{KMnO}_4$  staining. Flash column chromatography was performed either as described by Still *et al.* (W. C. Still, M. Kahn, A. Mitra, *J. Org. Chem.* 1978, 43, 2923.) using silica gel (partical size 0.032-0.063) purchased from Silicycle. Optical rotations were measured on a Jasco P-2000 polarimeter using a 100 mm path-length cell at 589 nm.  $^1\text{H}$  and  $^{13}\text{C}$  NMR spectra were recorded on a Bruker Avance III HD with Prodigy Cryoprobe (at 400MHz and 101 MHz, respectively), Varian 400 MR (at 400 MHz and 101 MHz, respectively), or a Varian Inova 500 (at 500 MHz and 126 MHz, respectively), and are reported relative to internal  $\text{CHCl}_3$  ( $^1\text{H}$ ,  $\delta = 7.26$ ), or DMSO ( $^1\text{H}$ ,  $\delta = 2.50$ ), and  $\text{CDCl}_3$  ( $^{13}\text{C}$ ,  $\delta = 77.0$ ), or DMSO ( $^{13}\text{C}$ ,  $\delta = 40.0$ ). Data for  $^1\text{H}$  NMR spectra are reported as follows: chemical shift ( $\delta$  ppm) (multiplicity, coupling constant (Hz), integration). Multiplicity and qualifier abbreviations are as follows: s = singlet, d = doublet, t = triplet, q = quartet, m = multiplet, br = broad, app = apparent. IR spectra were recorded on a Thermo Fisher Nicolet iS5 FTIR spectrometer and are reported in frequency of absorption ( $\text{cm}^{-1}$ ). HRMS were acquired using an Agilent 6200 Series TOF with an Agilent G1978A multimode source in electrospray ionization (ESI), atmospheric pressure chemical ionization (APCI), or mixed (MM) ionization mode. Analytical chiral SFC was performed with a Mettler SFC supercritical  $\text{CO}_2$  analytical chromatography system ( $\text{CO}_2 = 1450$  psi, column temperature =  $40^\circ\text{C}$ ) with Chiralcel AD-H, OD-H, AS-H, OB-H, and OJ-H columns (4.6 mm x 25 cm). Low-temperature X-ray diffraction data ( $\varphi$ - and  $\omega$ -scans) were collected on a Bruker AXS D8 VENTURE KAPPA diffractometer coupled to a PHOTON 100 CMOS detector with  $\text{Cu-K}\alpha$  radiation ( $\lambda = 1.54178 \text{ \AA}$ ) from an  $\text{I}\mu\text{S}$  micro-source.



## 2. Synthetic Procedures

### Preparation of ethyl ester **SI-2**

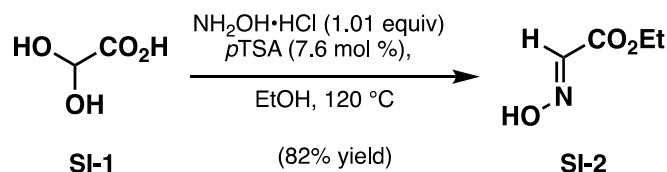

Charge a round bottom flask with glyoxylic acid monohydrate (**SI-1**, 20.0 g, 217 mmol 1.00 equiv), hydroxylamine hydrochloride (15.3 g, 220 mmol, 1.01 equiv), *p*TSA·H<sub>2</sub>O (3.12 g, 16 mmol, 7.6 mol%) and ethanol (260 mL). Fit with a Soxhlet extractor charged with activated 4Å molecular sieves and a reflux condenser. Heat the mixture at 120°C for 9 hours. Cool reaction to room temperature. Concentrate *in vacuo* then dilute oil in Et<sub>2</sub>O (400 mL) and NaHCO<sub>3(sat)</sub> (240 mL). Separate organic layer and wash organics with NH<sub>4</sub>Cl<sub>(sat)</sub> (100mL) followed by pH=7 buffer (100 mL). Test aqueous layer for product and re-extract with Et<sub>2</sub>O(150 mL), if necessary. Wash combined organics with brine (100 mL). Dry over Na<sub>2</sub>SO<sub>4</sub>, filter, and concentrate *in vacuo* to give clean **SI-2** (20.9 g, 174 mmol, 82% yield) as a pale yellow oil. Physical and spectral properties were consistent with literature values. (Mower, M. P.; Blackmond, D. G. *J. Am. Chem. Soc.* **2015**, *137* (6), 2386–2391.)

### Preparation of phenethyl ester **SI-3**

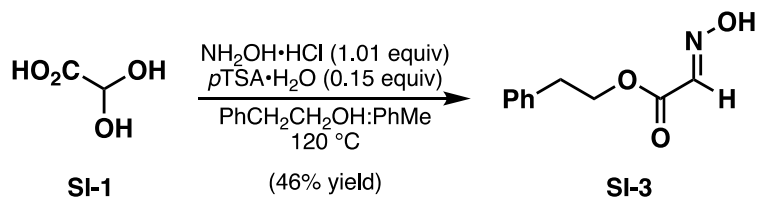

Combine glyoxylic acid monohydrate (**SI-1**, 3.00g, 32.59mmol, 1.0 equiv), hydroxylamine·HCl (2.29g, 32.92, 1.01 equiv), *p*-toluenesulfonic acid monohydrate (930.2mg, 4.89mmol 0.15 equiv) and phenethyl alcohol (11.7mL, 11.9g, 3.0 equiv) in toluene (10 mL). Heat mixture with a Dean-Stark trap to 50 °C and ramp to 120 °C over 80 min. Reflux overnight. Cool to ambient temperature, add EtOAc (100 mL). Wash organics layers with NaHCO<sub>3(aq)</sub> (100mL), then NH<sub>4</sub>Cl (20 mL), then pH=7 buffer (20 mL) and finally

brine (40mL). Dry organics over Na<sub>2</sub>SO<sub>4</sub>. Purify by flash chromatography (silica, 300 g, 20→40% EtOAc/Hexanes) to yield **SI-3** (2.92g, 15.1 mmol, 46% yield) as a pale liquid.

<sup>1</sup>H NMR (400 MHz, CDCl<sub>3</sub>) δ 10.88 (s, 1H), 7.55 (d, *J* = 1.7 Hz, 1H), 7.35 – 7.27 (m, 2H), 7.27 – 7.17 (m, 3H), 4.45 (td, *J* = 7.2, 1.6 Hz, 2H), 3.06 – 2.94 (m, 2H).

<sup>13</sup>C NMR (101 MHz, CDCl<sub>3</sub>) δ 162.44, 141.47, 137.10, 128.87, 128.59, 126.75, 66.15, 34.77.

FTIR (AT-IR) 3322.11, 3028.17, 2359.63, 1721.19, 1622.35, 1497.30, 1453.99, 1306.73, 1257.07, 1193.59, 1009.49, 917.54, 744.20, 697.56, 667.93 cm<sup>-1</sup>

HRMS (TOF, ES+) calc'd for C<sub>10</sub>H<sub>11</sub>NO<sub>3</sub> [M+H]<sup>+</sup> 194.0812, found 194.0819(ppm=-3.76)

#### Preparation of silylated oxime **12a**

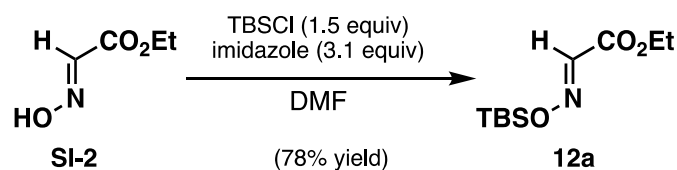

Combine **SI-2** (31.18g, 266 mmol), imidazole (55.76g, 819 mmol) and TBSCl (61.80g, 410 mmol) in DMF (210 mL). Stir at ambient temperature for 72h. Pour mixture into 6:1 DI:brine (2.1 L). Extract with Et<sub>2</sub>O (1.5L). Wash organic layer with brine (300 mL). Dry over Na<sub>2</sub>SO<sub>4</sub>, filter and concentrate in vacuo to yield crude product. Purify by flash chromatography (silica, 3.5-4.5% Et<sub>2</sub>O/Hexanes) to provide **12a** (47.8 g, 207 mmol, 78% yield) as a clear oil.

<sup>1</sup>H NMR (400 MHz, CDCl<sub>3</sub>) δ 7.59 (d, *J* = 1.5 Hz, 1H), 4.27 (qd, *J* = 7.1, 1.4 Hz, 2H), 1.31 (td, *J* = 7.1, 1.5 Hz, 3H), 0.92 (d, *J* = 1.9 Hz, 9H), 0.21 (d, *J* = 1.7 Hz, 6H).

<sup>13</sup>C NMR (101 MHz, CDCl<sub>3</sub>) δ 162.41, 146.20, 61.42, 25.91, 18.18, 14.22, -5.23.

FTIR (AT-IR) 2931.13, 2858.75, 1748.31, 1724.71, 1596.54, 1472.39, 1370.02, 1315.12, 1258.21, 1189.18, 1034.56, 967.56, 835.8, 785.55, 690.19, 667.95 cm<sup>-1</sup>

HRMS (TOF, ES+) calc'd for C<sub>20</sub>H<sub>21</sub>NO<sub>3</sub>Si [M+H]<sup>+</sup> 232.1363, found 232.1365 (ppm=-0.66)

*Preparation of silylated oxime 12b*

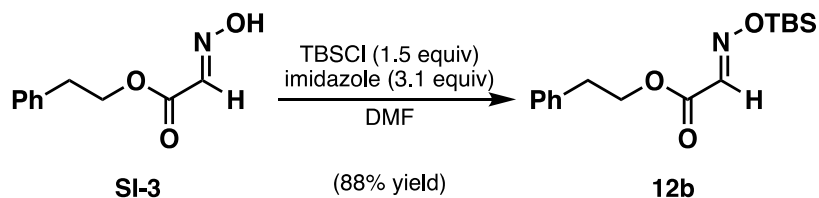

Take up **SI-3** (566.5 mg, 2.93 mmol, 1.0 equiv) in DMF (5 mL). Add imidazole (618.2 mg, 9.08 mmol, 1.5 equiv) and TBSCl (663.2 mg, 4.40 mmol, 3.1 equiv) and stir at ambient temperature for 24h. Dilute in 6:1 DI H<sub>2</sub>O:brine (26 mL) and extract with Et<sub>2</sub>O (19 mL). Wash organic layer with brine (3.5 mL). Dry over Na<sub>2</sub>SO<sub>4</sub>, filter, and concentrate to yield the crude product. Purify by flash chromatography (silica, 3→5% EtOAc/Hexanes) to yield pure **12b** (795.1 mg, 2.59 mmol, 88% yield)

**<sup>1</sup>H NMR** (400 MHz, CDCl<sub>3</sub>) δ 7.60 (d, *J* = 1.2 Hz, 1H), 7.33 – 7.26 (m, 2H), 7.26 – 7.19 (m, 3H), 4.42 (td, *J* = 6.9, 1.3 Hz, 2H), 2.98 (t, *J* = 6.9 Hz, 2H), 0.97 (d, *J* = 1.7 Hz, 9H), 0.25 (d, *J* = 1.7 Hz, 6H).

**<sup>13</sup>C NMR** (101 MHz, CDCl<sub>3</sub>) δ 162.24, 145.88, 137.57, 129.05, 128.52, 126.67, 65.78, 35.01, 25.89, 18.14, -5.28.

**FTIR** (AT-IR) 2930.10, 2857.88, 1746.89, 1724.23, 1595.23, 1471.85, 1314.23, 1252.38, 1182.26, 1012.32, 974.59, 834.85, 784.87, 748.45, 697.31 cm<sup>-1</sup>

**HRMS** (TOF, ES+) calc'd for C<sub>16</sub>H<sub>25</sub>NO<sub>3</sub>Si [M+H]<sup>+</sup> 308.1676, found 308.1676 (ppm=0.15)

*Synthesis of neopenylboronate 13b*

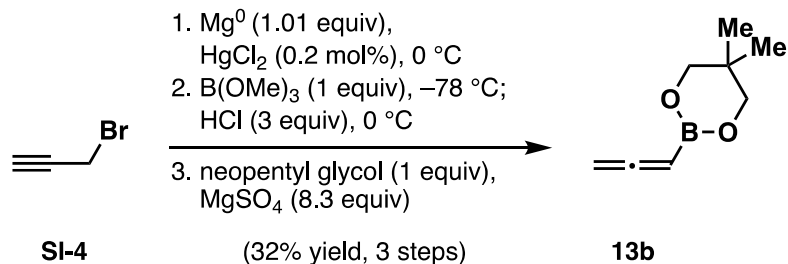

Adapted from: OL, 2011, p.4020; Org Syn. 1981, 60,41.

To freshly activated  $\text{Mg}^0$  (6.11g, 251.3mmol, 1.01 equiv), add  $\text{HgCl}_2$  (115mg, 0.425 mmol, 0.2 mol%) and suspend in  $\text{Et}_2\text{O}$  (50 mL). Propargyl bromide (29.79g, 250 mmol, 1.0 equiv) in PhMe (80 wt%, 27.8mL) was further diluted with additional  $\text{Et}_2\text{O}$  (170 mL). A small amount of the propargyl bromide solution (10 mL) was added to the suspension of  $\text{Mg}^0$ . Initiation was achieved through gentle heating of the resulting mixture. Cool in a salt/ice bath and add the remaining propargyl bromide solution as a slow, steady stream. After addition is complete, stir at ambient temperature for 1h. Cannulate the resulting Grignard solution, over 45 minute period, into a solution of freshly distilled trimethyl borate (26.0g, 27.9mL, 250 mmol, 1.0 equiv) in  $\text{Et}_2\text{O}$  (250 mL) cooled to  $-78 \text{ }^\circ\text{C}$ . After completion of Grignard addition, allow mixture to warm to ambient temperature. Cool the suspension once more to  $0 \text{ }^\circ\text{C}$  and cannulate 3M  $\text{HCl}_{(\text{aq})}$  (250 mL, 3 equiv) dropwise into over 3h. Stir mixture until solids disappear, approximately 1h, and a further 20 minutes at ambient temperature. Separate the organic layer and wash the aqueous layer with  $\text{Et}_2\text{O}$  ( $3 \times 150$  mL); dry the combined organics over  $\text{MgSO}_4$ . Decant dried organics into a 2L round bottom flask and wash the remaining solids with dry  $\text{Et}_2\text{O}$  (100 mL). Concentrate solution under reduced pressure until the 500mL remain and backfill with argon. Add anhydrous  $\text{MgSO}_4$  (250g, 2.08 mol, 8.31 equiv) and neopentyl glycol (26.04g, 250 mmol, 1.0 equiv). Rinse down solids with  $\text{Et}_2\text{O}$  (50 mL) and stir under argon with an overhead stirrer for 40h. Filter off solids using a large swivel frit. Take the caked solids and rinse with  $\text{Et}_2\text{O}$  ( $4 \times 100$  mL) through a packed sand filter. Recombine organic and remove solvent through a vacuum transfer. Add pentanes (400mL) to the remaining residue and cool to  $0 \text{ }^\circ\text{C}$ . Filter off precipitated solids with a large swivel frit and remove pentane through a vacuum transfer. The remaining yellow oil is purified by kugelrohr distillation ( $90 \text{ }^\circ\text{C}/ 5.0 \text{ Torr} \rightarrow 110 \text{ }^\circ\text{C}/1.0 \text{ Torr}$ ) to yield **13b** (12.61g, 83.0 mmol, 32% yield) as a clear oil.

**<sup>1</sup>H NMR** (400 MHz, CDCl<sub>3</sub>) δ 4.82 (t, *J* = 7.0 Hz, 1H), 4.61 (d, *J* = 7.0 Hz, 2H), 3.66 (s, 4H), 0.98 (s, 6H).

**<sup>13</sup>C NMR** (126 MHz, CDCl<sub>3</sub>) δ 217.90, 72.47, 69.77, 31.84, 21.82.

**<sup>11</sup>B NMR** (128 MHz, CDCl<sub>3</sub>) δ 26.48.

**FTIR** (AT-IR) 2961.46, 2886.72, 1934.21, 1477.56, 1414.40, 1377.85, 1327.80, 1256.69, 1224.66, 1181.98, 1129.78, 812.31, 681.34, 667.05 cm<sup>-1</sup>

*Small-scale enantioselective preparation of 11b*

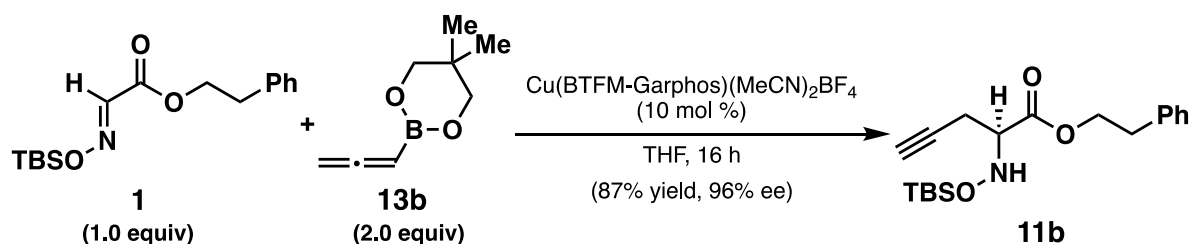

In a N<sub>2</sub>-filled glovebox, dilute Cu(*S*-BTFMGarphos)(MeCN)<sub>2</sub>BF<sub>4</sub> (28 mg, 0.020 mmol, 0.10 equiv) with THF (0.5 mL). Add **12b** (61.5 mg, 0.200 mmol) followed by **13b** (60.8 mg, 0.40 mmol, 2.0 equiv, 2 equiv) directly to the solution. Seal solution under N<sub>2</sub> and stir at ambient temperature for 16h. Dilute with EtOAc (2 mL) and diethanolamine (80 μL) and stir 15 minutes. Dilute with DI H<sub>2</sub>O (3.0 mL) and extract with EtOAc (3×4.0 mL). Dry organics over Na<sub>2</sub>SO<sub>4</sub>, filter and concentrate *in vacuo* to yield crude product. <sup>1</sup>H NMR yields with dimethyl terephthalate (10 mol%) as a standard. Purification by flash chromatography. (silica, 2.5%Et<sub>2</sub>O/ 10%CH<sub>2</sub>Cl<sub>2</sub>/10%PhMe/Hexanes) to yield **11b** (60.4 mg, 0.174 mmol, 87% yield) as a clear oil. The enantiomeric excess was determined to be 96% by chiral SFC analysis (AD, 2.5 mL/min, 1% IPA in CO<sub>2</sub>, λ = 254 nm): *t<sub>R</sub>*(minor) = 6.148 min, *t<sub>R</sub>*(major) = 5.116 min.

**<sup>1</sup>H NMR** (400 MHz, CDCl<sub>3</sub>): δ 7.33 – 7.28 (m, 2H), 7.24 (ddt, *J* = 7.6, 1.2, 0.6 Hz, 4H), 4.47 – 4.30 (m, 3H), 3.63 (t, *J* = 6.4 Hz, 1H), 2.98 (t, *J* = 7.1 Hz, 3H), 2.53 (tdd, *J* = 16.8, 6.4, 2.6 Hz, 2H), 2.04 – 1.93 (m, 1H), 0.89 (d, *J* = 0.5 Hz, 11H), 0.11 (d, *J* = 3.2 Hz, 6H).



$^{13}\text{C}$  NMR (101 MHz,  $\text{CDCl}_3$ )  $\delta$  171.71, 137.73, 129.01, 128.64, 126.73, 79.34, 70.98, 65.68, 63.94, 35.19, 26.28, 19.41, 18.07, -5.38, -5.43.

FTIR (AT-IR) 3309.43, 2928.68, 2856.23, 1739.08, 1497.68, 1471.5, 1389, 1345.74, 1279.25, 1248.5, 1178.39, 1055.21, 974.31, 900.14, 833.73, 780.66, 747.8, 698.5, 644.51  $\text{cm}^{-1}$

HRMS (TOF, ES+) calc'd for  $\text{C}_{19}\text{H}_{29}\text{NO}_3\text{Si}$   $[\text{M}+\text{H}]^+$  348.1989, found 348.1998 (ppm=-2.45)

$[\alpha]_D^{23}$  -16.3 ( $c = 1.0$ ,  $\text{CHCl}_3$ ).

### *rac*-11b

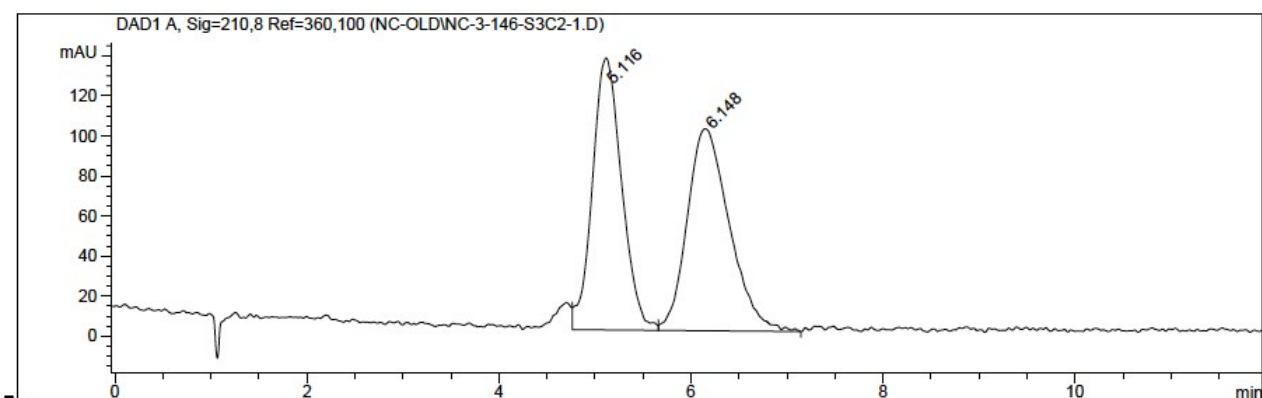

| Peak # | RetTime [min] | Type | Width [min] | Area [mAU*s] | Height [mAU] | Area %  |
|--------|---------------|------|-------------|--------------|--------------|---------|
| 1      | 5.116         | VV   | 0.3203      | 2889.85913   | 135.78705    | 48.4120 |
| 2      | 6.148         | VV   | 0.4361      | 3079.43994   | 100.88213    | 51.5880 |

### 11b

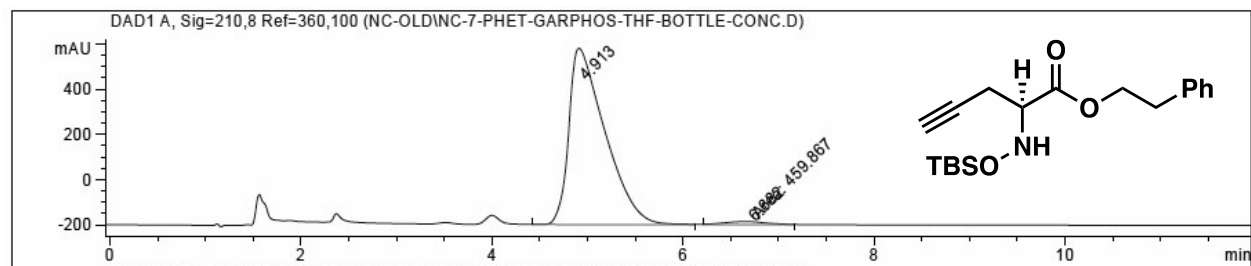

| Peak # | RetTime [min] | Type | Width [min] | Area [mAU*s] | Height [mAU] | Area %  |
|--------|---------------|------|-------------|--------------|--------------|---------|
| 1      | 4.913         | VB   | 0.3876      | 2.05818e4    | 780.59052    | 97.8145 |
| 2      | 6.682         | MM   | 0.5361      | 459.86694    | 14.29552     | 2.1855  |

### Gram-scale enantioselective preparation of **11a**

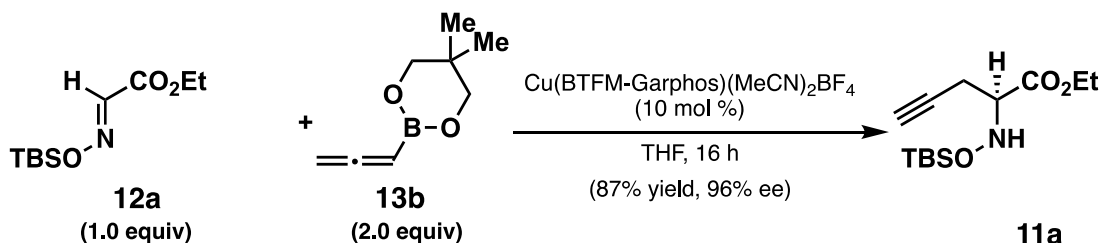

Stir  $\text{Cu}(\text{MeCN})_4\text{BF}_4$  (135.9 mg, 0.432 mmol, 0.10 equiv) and *S*-BTFMGarphos (512.6 mg, 0.432 mmol, 0.10 equiv) in MeCN (4.0 mL) for 10 minutes before concentrating *in vacuo* to yield a white powder. Dilute freshly prepared  $\text{Cu}(\text{S-BTFMGarphos})(\text{MeCN})_2\text{BF}_4$  (0.432 mmol, 0.10 equiv) in THF (21.6 mL), add **12a** (1.00 g, 4.322 mmol, 1.0 equiv) and **13b** (295 mg, 1.944 mmol, 2.0 equiv). Stir at ambient temperature for 16h. Dilute with EtOAc (40 mL) and diethanolamine (3.2 mL) and stir 15 minutes. Dilute with DI  $\text{H}_2\text{O}$  (120 mL) and extract with EtOAc (3×150 mL). Dry organics over  $\text{Na}_2\text{SO}_4$ , filter and concentrate *in vacuo* to yield crude product.  $^1\text{H}$  NMR yields with dimethyl terephthalate (10 mol%) as a standard. Purification by flash chromatography (silica, 2.5% $\text{Et}_2\text{O}$ /10% $\text{CH}_2\text{Cl}_2$ /10%PhMe/Hexanes) provided both **11a** (1.01 g, 3.76 mmol, 87% yield) and recovered ligand (450 mg, 88% recovery) Note: Any product fractions contaminated with ligand were concentrated and triturated with cold pentanes, before an azeotrope with PhMe. The enantiomeric excess was determined after benzylation to be 95% by chiral SFC analysis.

$^1\text{H}$  NMR (400 MHz,  $\text{CDCl}_3$ )  $\delta$  5.58 (s, 1H), 4.22 (q,  $J = 7.1$  Hz, 2H), 3.60 (t,  $J = 6.4$  Hz, 1H), 2.55 (dt,  $J = 6.4, 3.0$  Hz, 2H), 2.00 (t,  $J = 2.7$  Hz, 1H), 1.27 (td,  $J = 7.1, 0.7$  Hz, 3H), 0.86 (d,  $J = 1.0$  Hz, 9H), 0.08 (s, 6H).

$^{13}\text{C}$  NMR (101 MHz,  $\text{CDCl}_3$ )  $\delta$  171.77, 79.37, 70.86, 63.89, 61.25, 26.21, 19.37, 18.01, 14.34, -5.43, -5.49.

FTIR (AT-IR) 3313.49, 2929.08, 2856.83, 2361.12, 2340.34, 1738.61, 1472.12, 1370.05, 1342.99, 1248.41, 1215.41, 1186.14, 1054.34, 904.00, 834.61, 780.54, 667.96  $\text{cm}^{-1}$

**HRMS** (TOF, ES+) calc'd for C<sub>13</sub>H<sub>25</sub>NO<sub>3</sub>Si [M+H]<sup>+</sup> 272.1676, found 272.1674 (ppm=0.91)

[ $\alpha$ ]<sub>D</sub><sup>23</sup> -18.0° (c = 1.0, CHCl<sub>3</sub>).

#### Preparation of *N*-benzyl **14**

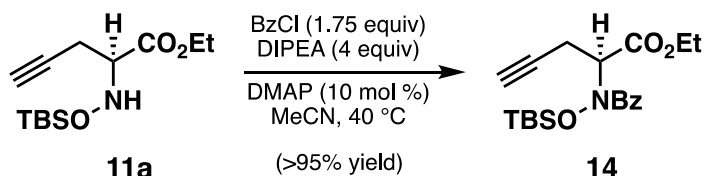

To a solution of **11a** (3.99 g, 14.70 mmol, 1.0 equiv) in MeCN (14.7 mL) add DIPEA (5.13 mL, 3.80 g, 29.40 mmol, 2.0 equiv) and benzoyl chloride (2.99 mL, 3.62 g, 25.73 mmol, 1.75 equiv) at ambient temperature and stir 30 minutes. Heat mixture to 40 °C stirring vigorously for 7 hours. Dilute in Et<sub>2</sub>O (140 mL) and wash organics with with pH=7 phosphate buffer (30 mL), then brine (30 mL). Dry organic layer with Na<sub>2</sub>SO<sub>4</sub>, filter through celite, and concentrate. Purify by flash chromatography (florisil, 20% Et<sub>2</sub>O/Hexanes) to yield **14** (5.5g, 14.65 mmol, >95% yield) as pale white crystals.

SFC analysis (IC, 5% *i*-PrOH in CO<sub>2</sub>) peak 1(major): 6.748 min; peak 2(minor): 8.324 min; 95% ee

**<sup>1</sup>H NMR** (400 MHz, CDCl<sub>3</sub>) δ 7.76 – 7.65 (m, 2H), 7.53 – 7.35 (m, 3H), 4.65 (dd, *J* = 10.5, 4.5 Hz, 1H), 4.21 (qdd, *J* = 10.7, 7.0, 3.6 Hz, 2H), 2.97 (ddd, *J* = 17.4, 10.6, 2.7 Hz, 1H), 2.89 – 2.70 (m, 1H), 2.14 (t, *J* = 2.7 Hz, 1H), 1.30 (t, *J* = 7.1 Hz, 3H), 0.95 (s, 9H), 0.30 (s, 3H), 0.21 (s, 3H).

**<sup>13</sup>C NMR** (101 MHz, CDCl<sub>3</sub>) δ 173.13, 168.28, 134.61, 131.05, 128.59, 128.48, 80.35, 71.70, 63.97, 62.11, 26.18, 18.58, 14.31, -4.31, -4.51.

**FTIR** (AT-IR) 3310.03, 2929.56, 2857.22, 2359.18, 1744.02, 1694.62, 1472.02, 1446.93, 1390.26, 1362.25, 1289.85, 1250.00, 1226.16, 1186.10, 1072.43, 1017.66, 964.62, 920.36, 831.69, 809.32, 783.13, 748.13, 703.47, 674.24, 654.39 cm<sup>-1</sup>

**HRMS** (TOF, ES+) calc'd for C<sub>20</sub>H<sub>30</sub>NO<sub>4</sub>Si [M+H]<sup>+</sup> 376.1939, found 376.1934

[ $\alpha$ ]<sub>D</sub><sup>23</sup> -89.9° (c=1.0, CHCl<sub>3</sub>)

*rac-14*

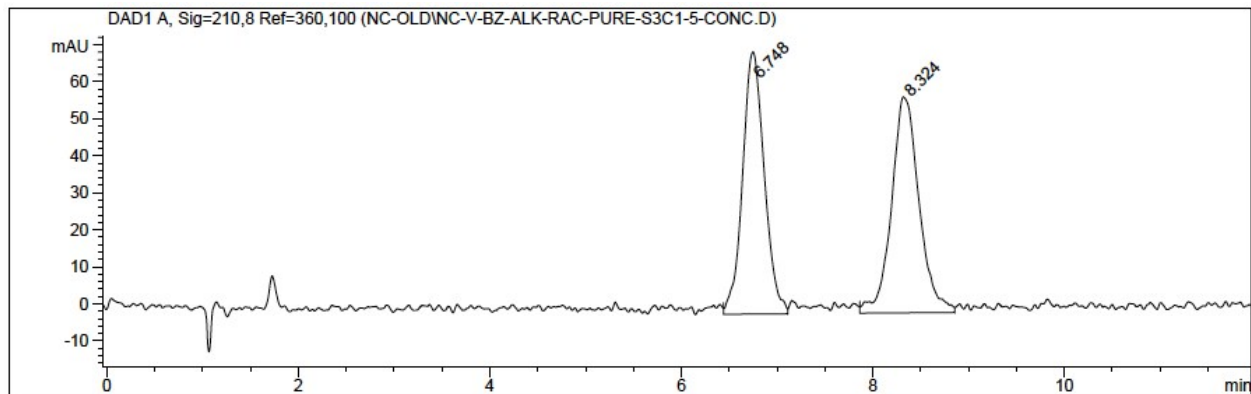

| Peak # | RetTime [min] | Type | Width [min] | Area [mAU*s] | Height [mAU] | Area %  |
|--------|---------------|------|-------------|--------------|--------------|---------|
| 1      | 6.748         | VV   | 0.2318      | 1116.34790   | 70.85162     | 48.8551 |
| 2      | 8.324         | VV   | 0.2857      | 1168.67224   | 58.33414     | 51.1449 |

14

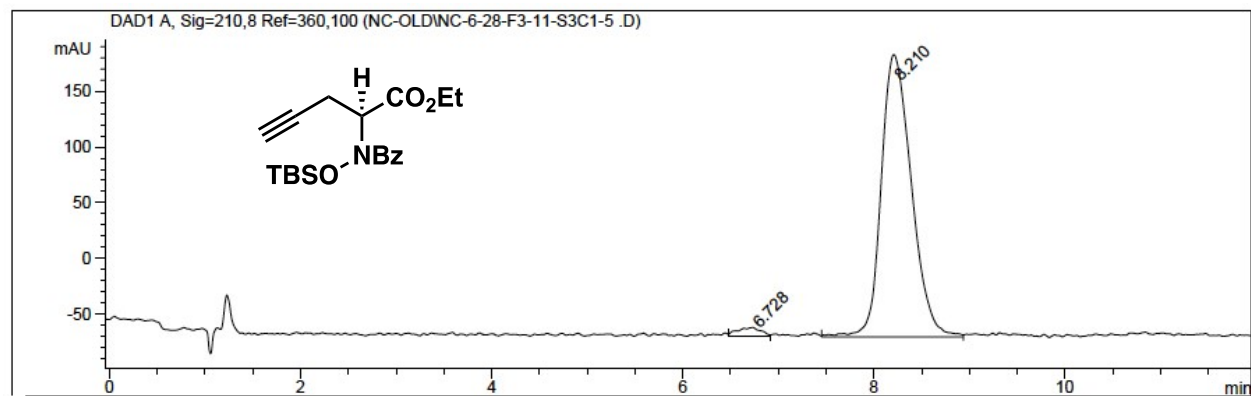

| Peak # | RetTime [min] | Type | Width [min] | Area [mAU*s] | Height [mAU] | Area %  |
|--------|---------------|------|-------------|--------------|--------------|---------|
| 1      | 6.728         | VV   | 0.2246      | 147.39131    | 8.40454      | 2.5675  |
| 2      | 8.210         | VV   | 0.3533      | 5593.31201   | 253.61139    | 97.4325 |

*Racemic preparation of 11a*

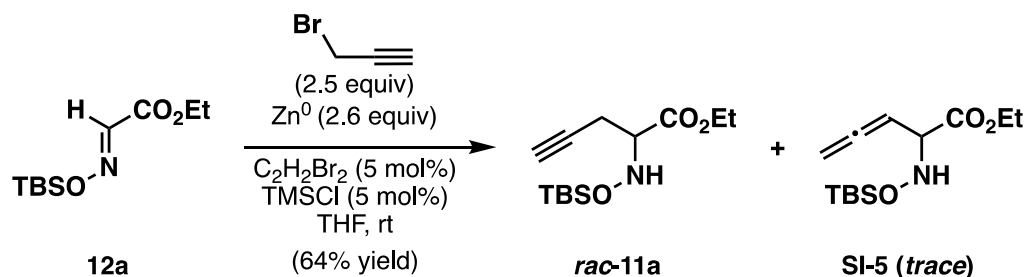

Suspend dry  $Zn^0$  (14.13 g, 224.74 mmol, 2.6 equiv) in THF (400 mL). Add 1,2-dibromoethane (0.37 mL, 812 mg, 4.32 mmol, 5 mol %) and  $TMSCl$  (0.55 mL, 469 mg, 4.32 mmol, 5 mol %), stir at room temperature for 45 min. Add a solution of propargyl bromide, 80%wt in PhMe, (0.20 mL, 1.80 mmol, 2 mol %). Heat gently until initiation is observed. Add the remainder of propargyl bromide, 80 wt% in PhMe, (23.9 mL, 214.57 mmol, 2.58 equiv) dropwise. With addition complete, stir 30 min at ambient temperature vigorously, until zinc is no longer consumed. Cannulate fresh organozinc into a solution of **12a** (20.00 g, 86.44 mmol, 1.0 equiv) in THF (400 mL) chilled to 0 °C, over a three hour period. Upon disappearance of starting material quench with  $NaHCO_3$ (sat) (200 mL). Filter off salts through a sand pad. Wash salts  $Et_2O$ (3×200 mL). Wash combined organics with 1:1 DI  $H_2O$ :brine then brine. Dry over  $Na_2SO_4$ , filter and concentrate in vacuo to yield crude product. Purification by flash chromatography (silica 500g, 5% EtOAc/Hexanes) yields **rac-11a** (15.1g, 55.6 mmol, 64% yield) as a pale yellow oil. Trace allene **SI-5** was also isolated for characterization.

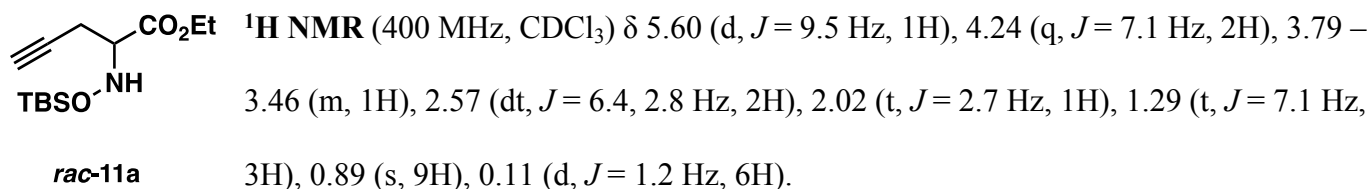

$^{13}C$  NMR (101 MHz,  $CDCl_3$ )  $\delta$  171.77, 79.37, 70.86, 63.89, 61.25, 26.21, 19.37, 18.01, 14.34, -5.43, -5.49.

FTIR (AT-IR) 3313.49, 2929.08, 2856.83, 2361.12, 2340.34, 1738.61, 1472.12, 1370.05, 1342.99, 1248.41, 1215.41, 1186.14, 1054.34, 904.00, 834.61, 780.54, 667.96  $cm^{-1}$

HRMS (TOF, ES+) calc'd for  $C_{13}H_{26}NO_3$   $[M+H]^+$  272.1676, found 272.1673(ppm=-1.28)

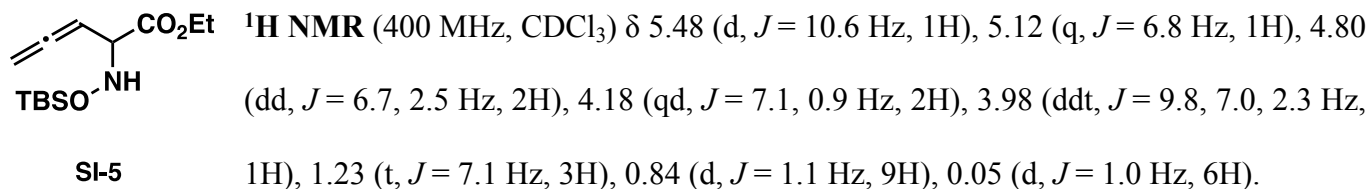

$^{13}\text{C NMR}$  (101 MHz,  $\text{CDCl}_3$ )  $\delta$  209.30, 171.64, 85.51, 77.47, 64.67, 64.64, 61.08, 26.19, 26.15, 26.13, 17.96, 14.34, 14.30, -5.49, -5.53, -5.57.

**FTIR** (AT-IR) 2929.12, 2856.96, 1957.66, 1741.62, 1472.28, 1390.00, 1368.67, 1301.88, 1247.48, 1183.61, 1043.73, 832.33, 779.68, 666.29  $\text{cm}^{-1}$

**HRMS** (TOF, ES+) calc'd for  $\text{C}_{11}\text{H}_{25}\text{NO}_3\text{Si}$   $[\text{M}+\text{H}]^+$  272.1676, found 272.1686 (ppm=3.67)

#### Preparation of *N*-acetyl alkyne **SI-6**

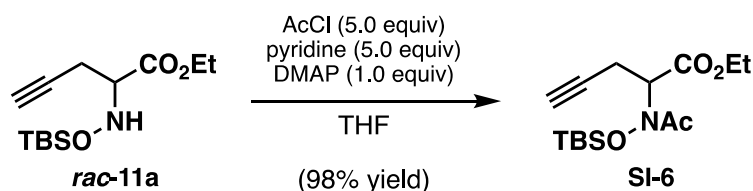

Add pyridine (1.48 mL, 1.46 g, 18.42 mmol, 5.0 equiv) and DMAP (450 mg, 3.83 mmol, 0.96 equiv) to solution of **rac-11a** (1.04 g, 3.83 mmol, 1.0 equiv) in THF (60 mL). Add acetyl chloride (1.31 mL, 1.45 g, 18.42 mmol, 5.0 equiv) and stir vigorously at ambient temperature for 18h. Dilute in  $\text{Et}_2\text{O}$  (50 mL) and wash with pH=7 phosphate buffer (50mL) then brine (50 mL). Dry organic phase over  $\text{Na}_2\text{SO}_4$ , filter and concentrate gave **SI-6** (1.18 g, 3.76 mmol, 98% yield) as a pale-yellow oil with no further purification necessary.

$^1\text{H NMR}$  (400 MHz,  $\text{CDCl}_3$ )  $\delta$  4.56 (t,  $J = 7.5$  Hz, 1H), 4.21 (q,  $J = 7.1$  Hz, 2H), 3.01 – 2.83 (m, 2H), 2.16 (s, 3H), 2.02 (t,  $J = 2.7$  Hz, 1H), 1.27 (t,  $J = 7.1$  Hz, 3H), 0.96 (s, 9H), 0.29 (s, 3H), 0.24 (s, 3H).

$^{13}\text{C NMR}$  (126 MHz,  $\text{CDCl}_3$ )  $\delta$  176.42, 168.14, 80.35, 70.42, 63.61, 61.72, 25.80, 21.52, 18.68, 17.93, 14.08, -4.51, -4.76.

**FTIR** (AT-IR) 3282.17, 2930.95, 2858.52, 2361.30, 1742.64, 1674.63, 1472.78, 1463.68, 1367.92, 1253.56, 1185.00, 1080.68, 1018.10, 983.77, 965.14, 938.25, 833.87, 784.10, 667.99  $\text{cm}^{-1}$

**HRMS** (TOF, ES+) calc'd for  $\text{C}_{15}\text{H}_{27}\text{NO}_4\text{Si}$   $[\text{M}+\text{H}]^+$  314.1782, found 314.1780 (ppm=0.67)

*Preparation of N-benzyl cyclohexadiene 15a*

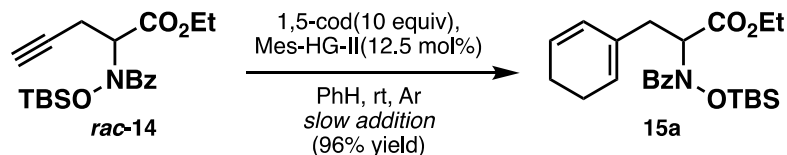

Solvate Mes-HG-II (692 mg, 1.103 mmol, 7.5 mol%) stored in the glovebox in benzene (55 mL). Maintain an Ar atmosphere. Add distilled and degassed 1,5-cyclooctadiene (18.0 mL, 15.90 g, 147.0 mmol, 10 equiv), stir five minutes. Concurrently, both a solution of *rac*-**14** (5.50 g, 14.70 mmol, 1.0 equiv) in benzene (360 mL) and a solution of Mes-HG-II (461 mg, 0.735 mmol, 5 mol%) in benzene (10.6 mL) were added by syringe pumps over 12h. Stir at room temperature for 2h. Concentrate the crude reaction onto celite (50 g) overnight. Purify by flash chromatography (silica 150 g, 10→20% Et<sub>2</sub>O/Hexanes). Concentrate to an oil and dilute in cold MeCN (50 mL). Filter off precipitate with celite and wash the celite pad twice with cold MeCN (50 mL). Concentrate to yield **15a** (6.09 g, 14.2 mmol, 96% yield) a beige oil.

**<sup>1</sup>H NMR** (400 MHz, CDCl<sub>3</sub>)  $\delta$  7.56 (dt,  $J = 6.8, 1.5$  Hz, 2H), 7.45 – 7.37 (m, 1H), 7.37 (s, 2H), 5.79 (dd,  $J = 9.5, 4.3$  Hz, 1H), 5.70 – 5.54 (m, 2H), 4.45 (dd,  $J = 10.1, 4.4$  Hz, 1H), 4.32 – 4.13 (m, 3H), 2.85 (dd,  $J = 14.2, 10.1$  Hz, 1H), 2.60 (d,  $J = 14.1$  Hz, 1H), 2.15 – 2.09 (m, 4H), 1.33 (t,  $J = 7.1$  Hz, 4H), 0.92 (s, 10H), 0.29 (s, 3H), 0.13 (s, 3H).

**<sup>13</sup>C NMR** (101 MHz, CDCl<sub>3</sub>)  $\delta$  170.80, 169.47, 134.72, 131.16, 130.60, 129.83, 128.26, 127.25, 126.70, 124.77, 64.74, 61.74, 33.61, 26.19, 22.55, 22.19, 18.87, 14.29, -3.86, -4.52.

**FTIR** (AT-IR) 2929.77, 2857.11, 2359.5, 2340.28, 1742.71, 1653.06, 1471.97, 1447.06, 1249.13, 1183.09, 1019.33, 969.71, 919.13, 826.95, 783.52, 735.42, 700.25, 667.9  $\text{cm}^{-1}$

**HRMS** (TOF, ES+) calc'd for  $\text{C}_{24}\text{H}_{35}\text{NO}_4\text{Si}$   $[\text{M}+\text{H}]^+$  430.2408, found 430.2395 (ppm=3.05)

Preparation of *N*-acetyl cyclohexadiene **15b**

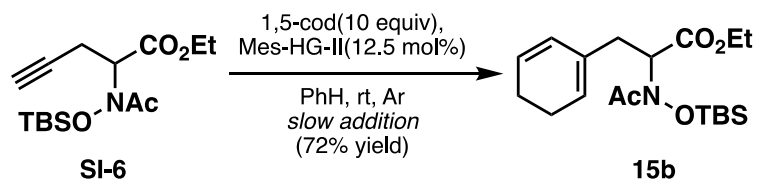

Solvate Mes-HG-II (176.7 mg, 0.282 mmol, 7.5 mol%) stored in the glovebox in benzene (14 mL). Maintain an Ar atmosphere. Add distilled and degassed 1,5-cyclooctadiene (4.62 mL, 4.07g, 37.64 mmol, 10 equiv), stirring vigorously (700 rpm). Concurrently, both a solution of **SI-6** (1.18g, 3.76mmol, 1 equiv) in benzene (90 mL) and a solution of Mes-HG-II (117.8 mg, 0.188 mmol, 5 mol%) in benzene (3.5 mL) were added by syringe pumps over 10h. Stir at room temperature for 3h. Concentrate the crude reaction onto celite overnight. Purify by flash chromatography (silica, 7.5→10% EtOAc/Hexanes). Add P(CH<sub>2</sub>CH<sub>2</sub>OH)<sub>3</sub> (1.16g, 20 equiv) to product-containing fractions along with silica and was sonicate until the combined solution is clear. Filter the solution was then and concentrate to yield **15b** (991mg, 2.70 mmol, 72% yield) a clear oil.

<sup>1</sup>H NMR (500 MHz, CDCl<sub>3</sub>) δ 5.81 (d, J = 1.3 Hz, 2H), 5.58 (d, J = 4.5 Hz, 1H), 4.47 (s, 1H), 4.26 – 4.08 (m, 2H), 2.78 (ddd, J = 14.2, 10.3, 0.9 Hz, 1H), 2.65 (dd, J = 14.4, 4.8 Hz, 1H), 2.10 – 2.04 (m, 7H), 1.27 (t, J = 7.1 Hz, 3H), 0.94 (s, 9H), 0.26 (s, 3H), 0.18 (s, 3H).

<sup>13</sup>C NMR (101 MHz, CDCl<sub>3</sub>) δ 175.10, 169.64, 131.84, 127.11, 126.84, 123.88, 64.01, 61.53, 33.64, 25.97, 22.52, 22.24, 21.62, 18.07, 14.22, -4.53.

FTIR (AT-IR) 2930.65, 2857.62, 2359.56, 2340.27, 1742.48, 1667.8, 1367.59, 1252.92, 1031.68, 832.83, 783.93, 667.92 cm<sup>-1</sup>

HRMS (TOF, ES+) calc'd for C<sub>19</sub>H<sub>33</sub>NO<sub>4</sub>Si [M+H]<sup>+</sup> 368.2252, found 368.2253 (ppm=-0.38)

Preparation of *N*-benzyl THO enone **8a**



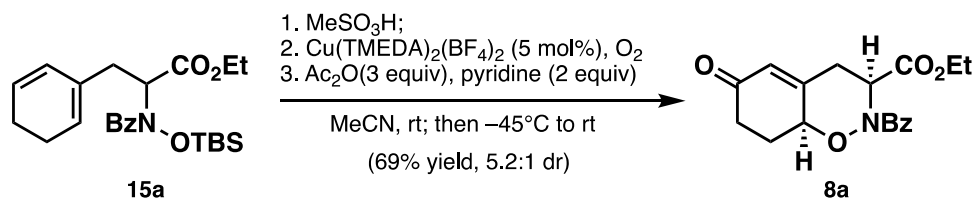

Add  $\text{MeSO}_3\text{H}$  (0.23 mL, 325 mg, 3.49 mmol, 0.5 equiv) to **15a** (3.00 g, 6.98 mmol, 1.00 equiv) under argon in wet MeCN (350 mL) and begin cool to  $-35^\circ\text{C}$ . Sparge reaction with  $\text{O}_2$  and add  $\text{Cu(TMEDA)}_2(\text{BF}_4)_2$  (0.0349 mmol, 0.05 equiv) as a solution in MeCN (1 mL). [Note:  $\text{Cu(TMEDA)}_2(\text{BF}_4)_2$  made by dissolving  $\text{Cu(BF}_4)_2 \cdot x\text{H}_2\text{O}$  (20 wt% Cu) (111 mg, 0.349 mmol, 0.05 equiv) and TMEDA (0.10 mL, 81 mg, 0.10 equiv) in MeCN (1 mL)]. Continue cooling to  $-45^\circ\text{C}$ . Stop  $\text{O}_2$  sparge after 10 minutes at  $-45^\circ\text{C}$ . Slowly allow reaction return to room temperature. Add acetic anhydride (3.84 mL, 4.16 g, 40.48 mmol, 6.0 equiv), stir 1 minute then add pyridine (0.54 mL, 534 mg, 6.75 mmol, 1 equiv) allow to stir under air overnight. Dilute with EtOAc (350 mL) wash with an aqueous solution (357 mL) composed of EDTA pH=9 buffer (7 mL), DI  $\text{H}_2\text{O}$  (175 mL) and brine (175 mL). Wash organic with additional brine (50 mL). Extract combined aqueous layer with EtOAc (2x100 mL). Dry combined organic layers over  $\text{Na}_2\text{SO}_4$ , filter and concentrate. Purify by flash chromatography (silica 215 g, 40% EtOAc/Hexanes) to yield **8a** and *anti-8a* as an overall 5.2:1 dr mixture (1.512 g, 4.59 mmol, 69% yield).

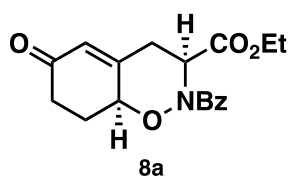

**8a**:  $^1\text{H NMR}$  (400 MHz,  $\text{CDCl}_3$ )  $\delta$  7.78 (d,  $J = 7.6$  Hz, 2H), 7.57 – 7.49 (m, 1H), 7.45 (ddt,  $J = 8.3, 6.6, 1.3$  Hz, 2H), 6.02 (d,  $J = 2.3$  Hz, 1H), 5.54 (s, 1H), 4.62 (s, 1H), 4.26 (q,  $J = 7.2$  Hz, 2H), 3.16 (d,  $J = 15.7$  Hz, 1H), 2.96 (dd,  $J = 15.8, 7.0$  Hz, 1H), 2.51 (d,  $J = 16.7$  Hz, 1H), 2.30 (td,  $J = 16.5, 15.9, 5.0$  Hz, 1H), 2.13 (d,  $J = 23.1$  Hz, 1H), 1.97 – 1.80 (m, 1H), 1.29 (t,  $J = 7.2$  Hz, 4H).

$^{13}\text{C NMR}$  (101 MHz,  $\text{CDCl}_3$ )  $\delta$  196.87, 170.20, 168.39, 153.52, 132.54, 131.83, 128.94, 128.27, 127.95, 78.86, 77.52, 62.33, 35.05, 31.33, 29.87, 26.33, 14.33.

**FTIR** (AT-IR) 2979.74, 2359.59, 1738.00, 1667.46, 1600.60, 1578.10, 1447.41, 1387.71, 1364.39, 1316.29, 1254.3, 1197.39, 1139.88, 1077.16, 1027.25, 975.89, 899.81, 871.89, 789.33, 758.51, 706.03, 617.25  $\text{cm}^{-1}$

**HRMS** (TOF, ES+) calc'd for C<sub>18</sub>H<sub>19</sub>NO<sub>5</sub> [M+H]<sup>+</sup> 330.1336, found 330.1337 (ppm=-0.31)

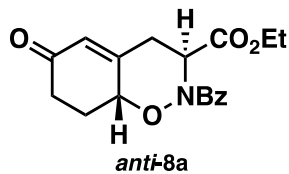

**anti-8a:** <sup>1</sup>H NMR (400 MHz, CDCl<sub>3</sub>) δ 7.80 (dt, *J* = 8.5, 1.6 Hz, 2H), 7.53 – 7.46 (m, 1H), 7.46 – 7.38 (m, 2H), 6.02 – 5.93 (m, 1H), 4.99 (dd, *J* = 9.6, 7.6 Hz, 1H), 4.76 (t, *J* = 8.3 Hz, 1H), 4.36 – 4.22 (m, 2H), 3.14 – 2.96 (m, 2H), 2.53 – 2.44 (m, 1H), 2.33 – 2.14 (m, 1H), 1.89 (ddd, *J* = 9.7, 8.0, 5.0 Hz, 2H), 1.35 – 1.29 (m, 3H).

<sup>1</sup>H NMR (500 MHz, CDCl<sub>3</sub>) δ 7.82 – 7.77 (m, 2H), 7.52 – 7.46 (m, 1H), 7.45 – 7.39 (m, 2H), 6.01 – 5.96 (m, 1H), 4.98 (dd, *J* = 9.6, 7.5 Hz, 1H), 4.81 – 4.68 (m, 1H), 4.28 (q, *J* = 7.1 Hz, 2H), 3.10 – 2.95 (m, 2H), 2.49 (dddd, *J* = 17.2, 4.4, 2.9, 1.2 Hz, 1H), 2.31 – 2.19 (m, 1H), 1.97 – 1.80 (m, 2H), 1.31 (t, *J* = 7.1 Hz, 3H).

<sup>13</sup>C NMR (101 MHz, CDCl<sub>3</sub>) δ 196.64, 170.15, 168.93, 157.09, 132.65, 131.60, 129.22, 128.10, 127.77, 80.96, 62.26, 58.14, 35.41, 30.86, 27.55, 14.28.

**FTIR** (AT-IR) 2359.53, 2340.23, 1729.8, 1637.97, 1577.29, 1448.88, 1394.9, 1300.99, 1245.96, 1199.42, 1098.44, 1008.47, 981.15, 962.42, 904.15, 844.43, 790.7, 736.73, 707.82, 667.97, 635.45 cm<sup>-1</sup>

**HRMS** (TOF, ES+) calc'd for C<sub>18</sub>H<sub>19</sub>NO<sub>5</sub> [M+H]<sup>+</sup> 330.1336, found 330.1334 (ppm=0.60)

### Preparation of *N*-acetyl THO enone **8b**

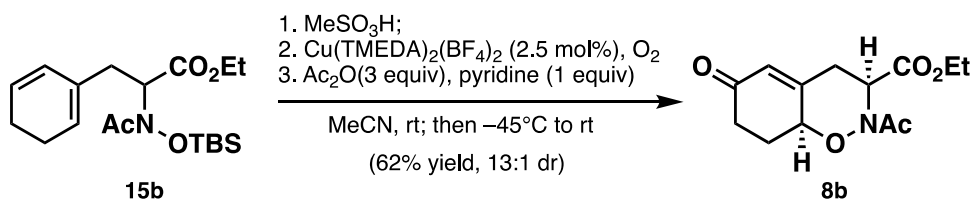

Add MeSO<sub>3</sub>H (18 μL, 26.1 mg, 0.272 mmol, 0.5 equiv) in MeCN (0.5 mL) to **15b** (200 mg, 0.544 mmol, 1.0 equiv) under argon in wet MeCN (26 mL) and begin cool to –35 °C. Sparge reaction with O<sub>2</sub> and add Cu(TMEDA)<sub>2</sub>(BF<sub>4</sub>)<sub>2</sub> (0.00136 mmol, 0.05 equiv) as a solution in MeCN (0.5 mL). Note: Cu(TMEDA)<sub>2</sub>(BF<sub>4</sub>)<sub>2</sub> made by dissolving Cu(BF<sub>4</sub>)<sub>2</sub>•xH<sub>2</sub>O (20 wt% Cu) (4.3 mg, 0.0136 mmol, 0.05 equiv) and TMEDA (4 μL, 3.2 mg, 0.0272 mmol, 0.10 equiv) in MeCN (0.5 mL). Continue cooling to –45 °C. Stop O<sub>2</sub> sparge after 10 minutes but continue stirring at –45 °C for 2h. Slowly allow reaction return to room temperature. Add acetic anhydride (0.16 mL, 168 mg, 1.632 mmol, 3.0 equiv), stir 1 minute then add pyridine (44 μL, 43 mg, 0.544 mmol, 1 equiv) allow to stir under air overnight. Dilute with EtOAc (20 mL) wash with an aqueous solution (35 mL) composed of EDTA pH=9 buffer (10 mL), DI H<sub>2</sub>O (5mL) and brine (5 mL). Extract combined aqueous with EtOAc (10 mL) Wash combined organics with additional brine (20 mL). Dry combined organic layers over Na<sub>2</sub>SO<sub>4</sub>, filter and concentrate. Purify crude material by flash chromatography on silica with 100% Et<sub>2</sub>O then 75% to 100%EtOAc/Hexanes. Recovered 90 mg (0.337 mmol, 62% yield) of **8b** as a mixture of diastereomers (13:1 dr).

**<sup>1</sup>H NMR** (600 MHz, CDCl<sub>3</sub>) δ 6.01 (q, *J* = 1.5 Hz, 1H), 5.41 (dd, *J* = 7.2, 1.4 Hz, 1H), 4.68 (dd, *J* = 10.7, 5.1 Hz, 1H), 4.27 – 4.15 (m, 2H), 3.11 (ddt, *J* = 15.7, 1.5, 0.7 Hz, 1H), 2.84 (dddd, *J* = 15.7, 7.2, 2.5, 1.6 Hz, 1H), 2.63 – 2.55 (m, 1H), 2.41 – 2.33 (m, 2H), 2.25 (s, 3H), 1.98 (dddd, *J* = 16.2, 14.1, 9.0, 3.3 Hz, 1H), 1.26 (td, *J* = 7.1, 1.0 Hz, 4H).

**<sup>13</sup>C NMR** (126 MHz, CDCl<sub>3</sub>) δ 196.79, 171.44, 168.28, 153.41, 127.93, 78.79, 62.19, 53.60, 35.02, 31.50, 26.38, 20.30, 14.26.

**FTIR** (AT-IR) 2931.38, 2360.54, 1737.83, 1668.55, 1402.03, 1368.95, 1314.81, 1256.65, 1198.38, 1026.43, 975.46, 945.41, 900.55, 725.65 cm<sup>-1</sup>

**HRMS** (TOF, ES<sup>+</sup>) calc'd for C<sub>13</sub>H<sub>17</sub>NO<sub>5</sub> [M+H]<sup>+</sup> 268.1179, found 268.1180 (ppm=-0.19)

*Preparation of epoxy ketone 17*

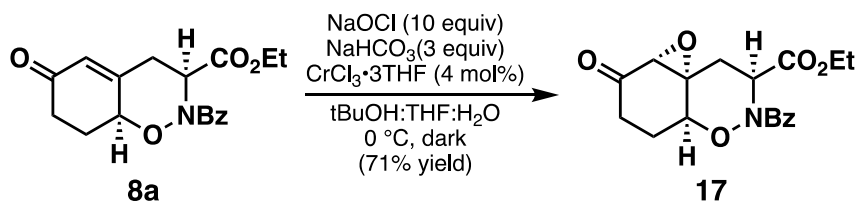

Substrate **8a** (726.8mg, 2.207 mmol, 1 equiv) was dissolved in THF (37 mL) and pH=7 phosphate buffer (11 mL), reaction is kept dark, cooled to 0 °C. Cannulate suspension of CrCl<sub>3</sub>·3THF (33mg, 0.088 mmol, 0.04 equiv) and NaHCO<sub>3</sub> (556 mg, 6.620 mmol, 3.0 equiv) in THF (74 mL) and H<sub>2</sub>O (33 mL) dropwise. After 75 minutes, reaction is complete. Add 0.20M sodium thiosulfate and pH=7 phosphate buffer, Extract with CH<sub>2</sub>Cl<sub>2</sub> three times (note: an emulsion forms, allow to settle). Wash organic layer with brine. Dry organics over Na<sub>2</sub>SO<sub>4</sub> filter and concentrate. Separate crude material on florisil (35g) with a gradient 20–50% EtOAc in Hexanes to provide **17** (540.7 mg, 1.56 mmol, 71% yield) as a white solid

**<sup>1</sup>H NMR** (500 MHz, CDCl<sub>3</sub>) δ 7.74 (d, *J* = 7.6 Hz, 2H), 7.55 – 7.49 (m, 1H), 7.48 – 7.40 (m, 2H), 5.68 (s, 1H), 4.36 (s, 1H), 3.30 (s, 1H), 2.62 (dd, *J* = 13.5, 6.1 Hz, 1H), 2.36 (dt, *J* = 17.3, 5.2 Hz, 1H), 2.22 (dd, *J* = 20.4, 15.0 Hz, 2H), 2.11 (d, *J* = 15.4 Hz, 1H), 1.79 (s, 1H), 1.28 (t, *J* = 7.2 Hz, 3H).

**<sup>13</sup>C NMR** (126 MHz, CDCl<sub>3</sub>) δ 202.53, 170.07, 168.33, 131.70, 128.81, 128.17, 78.81, 62.40, 60.80, 60.30, 55.39, 31.71, 30.86, 22.01, 14.29.

**FTIR**(AT-IR) 2979.80, 2359.60, 1716.02, 1656.84, 1578.52, 1447.13, 1389.33, 1366.88, 1309.09, 1257.56, 1178.77, 1092.65, 1026.42, 974.69, 920.18, 870.32, 788.06, 748.64, 707.41 cm<sup>-1</sup>

**HRMS** (TOF, ES+) calc'd for C<sub>18</sub>H<sub>19</sub>NO<sub>6</sub> [M+H]<sup>+</sup> 346.1285, found 346.1291 (ppm=−1.69)

*Preparation of epoxy enone 17*

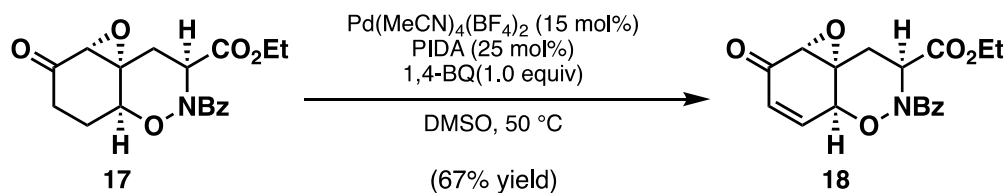

To a solution of substrate **17** (1.688 g, 4.89 mmol, 1.0 equiv) in DMSO(0.15M, 32.5 mL) add 1,4-benzoquinone (660 mg, 6.11 mmol, 1.25 equiv),  $\text{Pd}(\text{MeCN})_4(\text{BF}_4)_2$  (325.7 mg, 0.733 mmol, 0.15 equiv), and PIDA(394 mg, 1.22 mmol, 0.25 equiv). Heat to 50 °C, stir 96h. Cool to ambient temperature. Add 75 mL  $\text{NaHCO}_3(\text{aq})$ , extract 4x175 mL EtOAc. Wash organic layer with 40 mL brine. Dry organic layer with  $\text{Na}_2\text{SO}_4$ , filter, and concentrate. Purify by flash chromatography (silica 175 g, 15%EtOAc/40% $\text{CH}_2\text{Cl}_2$ /Hexanes) to yield **18** (1.12g, 3.26 mmol, 67% yield).

**$^1\text{H}$  NMR** (400 MHz,  $\text{CDCl}_3$ )  $\delta$  7.79 – 7.69 (m, 2H), 7.58 – 7.50 (m, 1H), 7.49 – 7.41 (m, 2H), 6.30 (s, 1H), 6.08 (dt,  $J = 10.6, 1.4$  Hz, 1H), 5.65 (s, 1H), 4.72 (s, 1H), 4.34 – 4.12 (m, 3H), 3.53 (t,  $J = 1.6$  Hz, 1H), 2.70 (dd,  $J = 13.9, 6.2$  Hz, 1H), 2.28 (d,  $J = 14.0$  Hz, 1H), 1.27 (t,  $J = 7.1$  Hz, 4H).

**$^{13}\text{C}$  NMR** (101 MHz,  $\text{CDCl}_3$ )  $\delta$  192.45, 170.22, 168.04, 136.07, 132.22, 131.90, 130.64, 128.71, 128.27, 76.11, 62.50, 60.42, 59.24, 55.60, 29.61, 14.19.

**FTIR** (AT-IR) 2982.21, 1737.29, 1690.76, 1661.42, 1600.80, 1579.13, 1447.34, 1390.80, 1365.58, 1334.93, 1306.37, 1266.83, 1226.57, 1187.35, 1026.36, 947.14, 910.44, 859.39, 826.78, 780.45, 729.61, 708.37, 647.95  $\text{cm}^{-1}$

**HRMS** (TOF, ES+) calc'd for  $\text{C}_{18}\text{H}_{17}\text{NO}_6$   $[\text{M}+\text{H}]^+$  344.1129, found 344.1127 (ppm=0.48)

#### Preparation of bis-epoxy ketone **19**

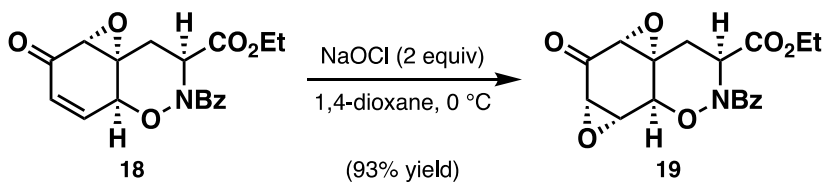

To chill a solution of **18** (1.1207g, 3.26 mmol, 1 equiv) in wet dioxane (13 mL dioxane, 0.1mL DI  $\text{H}_2\text{O}$ ) to 0 °C. Add NaOCl (12.5 wt% in  $\text{H}_2\text{O}$ ) (3.62mL, 4.37g (243 mg NaOCl), 2.25 equiv) Stir 5h at 0 °C. Dilute

in 1:1 brine/DI H<sub>2</sub>O (65 mL). Extract with EtOAc 3x75mL. Dry organics over Na<sub>2</sub>SO<sub>4</sub>. Filter and concentrate. Take up crude in benzene, concentrate; take up again in hexanes and re-concentrate. Yields **19** (1.09g, 93% yield) as a white foam. [Note: **19** was not amenable to chromatographic purification due to instability and was used with no further purification.]

<sup>1</sup>H NMR (400 MHz, CDCl<sub>3</sub>) δ 7.78 – 7.69 (m, 2H), 7.56 – 7.49 (m, 1H), 7.49 – 7.40 (m, 2H), 5.53 (s, 0H), 4.74 (s, 1H), 3.43 (d, *J* = 1.8 Hz, 1H), 3.40 (s, 1H), 3.39 – 3.33 (m, 1H), 2.63 (dd, *J* = 14.0, 6.1 Hz, 1H), 2.11 (dd, *J* = 14.1, 1.8 Hz, 1H), 1.28 (t, *J* = 7.1 Hz, 4H).

<sup>13</sup>C NMR (101 MHz, CDCl<sub>3</sub>) δ 197.03, 170.44, 167.70, 132.10, 131.96, 128.50, 128.32, 75.09, 63.75, 62.60, 61.63, 56.77, 55.37, 54.25, 31.10, 14.14.

FTIR (AT-IR) 1736.36, 1707.34, 1666.01, 1447.25, 1368.08, 1303.87, 1226.04, 1185.33, 1022.17, 947.87, 912.99, 868.45, 788.53, 708.45 cm<sup>-1</sup>

HRMS (TOF, ES+) calc'd for C<sub>18</sub>H<sub>17</sub>NO<sub>7</sub> [M+H]<sup>+</sup> 360.1078, found 360.1078 (ppm=−0.06)

#### Preparation of Wharton products **20a** and **20b**

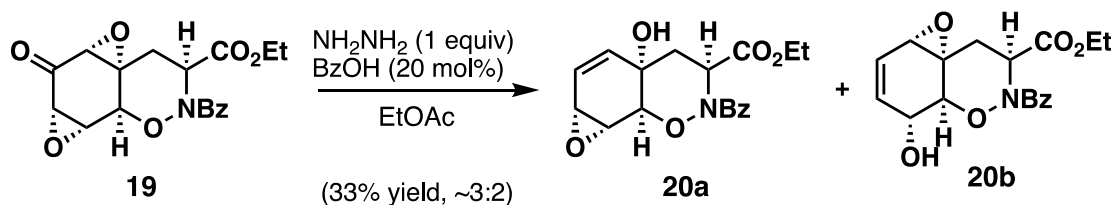

Cool to solution of benzoic acid (6.8 mg, 0.057 mmol, 0.20 equiv) in EtOAc (2mL) to 10 °C. Concurrently, add solutions of NH<sub>2</sub>NH<sub>2</sub> (8.9 mg, 8.7μL, 0.278 mmol) in EtOAc (5 mL) and **19** (100 mg, 0.278 mmol) in EtOAc (5 mL) dropwise via syringes to the cooled reaction flask over 30 minutes. Rinse substrate syringe with EtOAc (1 mL). Bring reaction to ambient temperature and stir five minutes before adding triethylamine (1 mL). Filter through a neutralized florisil plug and rinse plug with (5% NEt<sub>3</sub>/EtOAc). Purification of that crude mixture by flash chromatography (florisil 5.0g, 5% NEt<sub>3</sub>/50%EtOAc/Hexanes) to yield a 3:2 mixture

of **20a** and **20b** (31.4mg, 0.091mmol, 33% yield) which were carried forward as a mixture. **20b** could be isolated cleanly for characterization by flash chromatography (40%EtOAc/Hexanes).

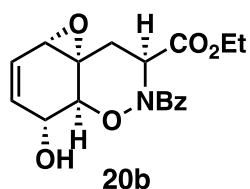

**20b**:  $^1\text{H NMR}$  (400 MHz,  $\text{CDCl}_3$ )  $\delta$  7.72 (d,  $J = 7.7$  Hz, 2H), 7.56 – 7.47 (m, 1H), 7.46 – 7.36 (m, 2H), 6.19 (dd,  $J = 9.8, 4.0$  Hz, 1H), 6.13 – 6.02 (m, 1H), 5.66 (s, 1H), 4.30 (s, 1H), 4.24 (q,  $J = 7.1$  Hz, 2H), 3.92 (s, 1H), 3.41 (dt,  $J = 4.1, 1.3$  Hz, 1H), 2.69

(dd,  $J = 13.3, 6.2$  Hz, 1H), 2.39 – 2.22 (m, 1H), 1.73 – 1.62 (m, 1H), 1.27 (t,  $J = 7.1$  Hz, 3H).

$^{13}\text{C NMR}$  (101 MHz,  $\text{CDCl}_3$ )  $\delta$  170.16, 168.79, 136.71, 133.28, 131.70, 128.76, 128.19, 126.98, 81.68, 64.57, 62.28, 59.83, 55.26, 54.45, 31.04, 14.34.

**FTIR** (AT-IR) 3457.65, 2981.45, 2359.53, 2340.24, 1739.24, 1652.54, 1576.29, 1447.92, 1394.23, 1317.61, 1274.82, 1267.49, 1230.14, 1189.56, 1028.04, 954.06, 867.43, 809.44, 788.73, 763.78, 749.59, 708.28, 667.92  $\text{cm}^{-1}$

**HRMS** (TOF, ES+) alc'd for  $\text{C}_{18}\text{H}_{19}\text{NO}_6$   $[\text{M}+\text{H}]^+$  346.1285, found 346.1282 (ppm=0.91)

#### Preparation of silylated allylic alcohol **21**

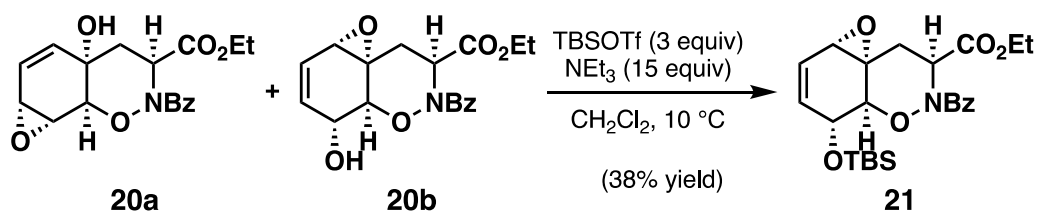

Cool solution of **20a** and **20b** (31.6 mg, 0.0915 mmol) to  $-5^\circ\text{C}$ . Add triethylamine (93mg, 128  $\mu\text{L}$ , 0.915 mmol, 10 equiv) followed by TBSOTf (48.4 mg, 42  $\mu\text{L}$ , 0.183 mmol, 2.0 equiv). Warm to  $10^\circ\text{C}$  and stir 25 minutes. Add additional triethylamine (44 mg, 60  $\mu\text{L}$ , 0.430 mmol, 4.7 equiv) followed by TBSOTf (23 mg, 20  $\mu\text{L}$ , 0.087 mmol, 0.95 equiv). Quench excess TBSOTf with *i*-PrOH (25  $\mu\text{L}$ ) and stir at ambient temperature for 5 minutes. Concentrate crude reaction and purify by flash chromatography (florisil 3.6g, 2%  $\text{NEt}_3/5 \rightarrow 15\%$ EtOAc/Hexanes) provides **21** (9.6mg, 0.0209 mmol, 38% yield).

**<sup>1</sup>H NMR** (400 MHz, CDCl<sub>3</sub>) δ 7.78 – 7.68 (m, 2H), 7.48 (d, *J* = 1.6 Hz, 1H), 7.44 – 7.38 (m, 2H), 6.04 (ddd, *J* = 10.0, 3.6, 1.3 Hz, 1H), 5.77 (ddd, *J* = 10.0, 4.1, 1.1 Hz, 1H), 5.46 (s, 1H), 4.23 (d, *J* = 5.7 Hz, 2H), 4.16 (s, 1H), 4.08 (d, *J* = 3.8 Hz, 1H), 3.24 (dt, *J* = 3.6, 1.0 Hz, 1H), 2.45 (dd, *J* = 13.8, 5.1 Hz, 2H), 1.29 (t, *J* = 7.1 Hz, 3H), 0.78 (s, 9H), -0.10 (d, *J* = 34.0 Hz, 6H).

**<sup>13</sup>C NMR** (101 MHz, CDCl<sub>3</sub>) δ 169.81, 169.07, 134.70, 132.72, 131.30, 128.61, 128.04, 124.94, 84.87, 66.65, 61.89, 58.77, 52.47, 30.67, 29.69, 25.75, 18.04, 14.19, -4.88, -4.92.

**FTIR** (AT-IR) 2954.10, 2928.42, 2856.26, 2361.06, 2340.36, 1739.52, 1652.91, 1471.97, 1447.94, 1389.33, 1315.95, 1253.02, 1226.52, 1188.91, 1094.5, 1027.62, 915.93, 878.84, 837.35, 814.81, 778.37, 746.41, 706.37, 668.03, 654.57, 648.90, 632.41, 617.5, 608.61 cm<sup>-1</sup>

**HRMS** (TOF, ES+) calc'd for C<sub>24</sub>H<sub>33</sub>NO<sub>6</sub>Si [M+H]<sup>+</sup> 460.2150, found 460.2146 (ppm=0.85)

#### Preparation of *N*-H THO derivative **22**

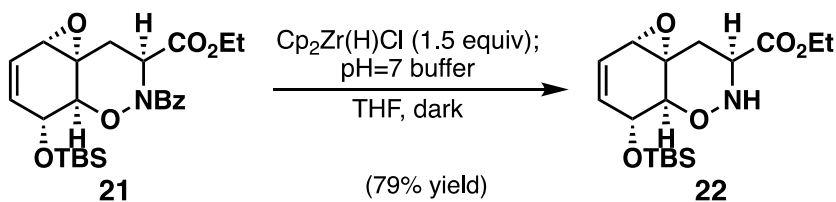

To a stirred suspension of Cp<sub>2</sub>Zr(H)Cl (12.4 mg, 0.0320 mmol, 1.5 equiv) in THF (0.15 mL) add **21** (14.7 mg, 0.0320 mmol, 1.0 equiv) in a steady stream as a solution in THF (1.75 mL). Rinse substrate syringe with THF (3×0.15mL) Stir at ambient temperature for 10 minutes. Quench reaction with the rapid addition of a pH=7 phosphate buffer (0.50 mL). Extract aqueous four times with EtOAc. Dry organics over Na<sub>2</sub>SO<sub>4</sub>. Filter and concentrate, purify crude product by flash chromatography (florisil 1.50 g, 10–60% EtOAc/Hexanes, +10% EtOAc/10 mL eluent). Concentrate and re-concentrate from dry toluene to yield **22** as a white solid (9.0 mg, 0.0253 mmol, 79% yield).

**<sup>1</sup>H NMR** (400 MHz, CDCl<sub>3</sub>) δ 6.41 (s, 1H), 6.06 (d, *J* = 3.8 Hz, 1H), 5.82 (dddd, *J* = 10.0, 5.0, 1.3, 0.7 Hz, 1H), 4.34 – 4.16 (m, 2H), 4.15 (dt, *J* = 1.7, 0.8 Hz, 1H), 4.13 (ddd, *J* = 5.0, 1.9, 0.8 Hz, 1H), 3.90 (ddd, *J* =



6.0, 2.8, 1.0 Hz, 1H), 3.21 (dt,  $J = 4.0, 1.2$  Hz, 1H), 2.57 (dd,  $J = 13.4, 5.9$  Hz, 1H), 2.12 (dt,  $J = 13.4, 2.3$  Hz, 1H), 1.29 (t,  $J = 7.1$  Hz, 3H), 0.89 (s, 9H), 0.09 (d,  $J = 8.4$  Hz, 6H).

$^{13}\text{C}$  NMR (126 MHz,  $\text{CDCl}_3$ )  $\delta$  171.70, 133.48, 125.45, 81.96, 67.70, 61.78, 59.88, 59.68, 53.79, 31.59, 26.08, 18.43, 14.41, -4.34.

**FTIR** (AT-IR) 2928.00, 2855.59, 2361.23, 2339.00, 1734.81, 1472.07, 1462.93, 1388.10, 1251.36, 1225.94, 1180.11, 1082.99, 1026.99, 1005.17, 931.05, 859.36, 836.96, 776.80, 739.28, 667.95  $\text{cm}^{-1}$

**HRMS** (TOF, ES+) calc'd for  $\text{C}_{17}\text{H}_{29}\text{NO}_5\text{Si}$   $[\text{M}+\text{H}]^+$  356.1888, found 356.1891 (ppm=-0.91)

#### Derivatization of **18** for X-ray crystallography

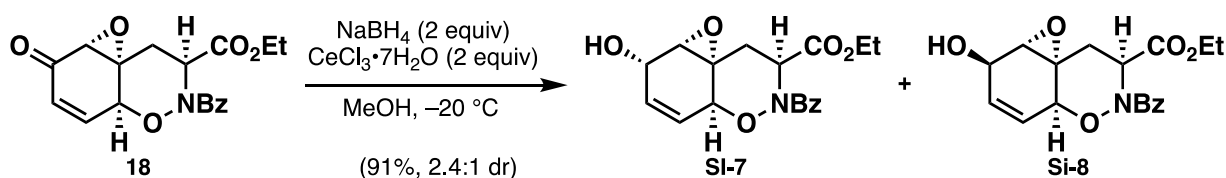

Cool **18** (140 mg, 0.408 mmol, 1.0 equiv) and  $\text{CeCl}_3 \cdot 7\text{H}_2\text{O}$  (304 mg, 0.816 mmol, 2.0 equiv) in MeOH (6.7 mL) to  $-20\text{ }^\circ\text{C}$ . Add a solution of  $\text{NaBH}_4$  (30.9 mg, 0.816 mmol, 2.0 equiv) and stir for 30 minutes before raising the temperature to  $0\text{ }^\circ\text{C}$ . Add  $\text{NaHCO}_3(\text{aq})$  (9 mL). Extract with EtOAc four times. Wash combined organics with brine. Dry over  $\text{Na}_2\text{SO}_4$ , filter, and concentrate. Purification by flash chromatography (fine silica, 20% PhMe/40% Acetone/Hexanes) provided **SI-7** (63.3 mg, 0.183 mmol, 45% yield) and some mixed fractions which were subsequently purified on normal phase prep-HPLC (45% EtOAc/Hexanes) to provide additional **SI-7** (27.0 mg, 0.078 mmol, 19% yield) and **SI-8** (38.4 mg, 0.111 mmol, 27% yield).

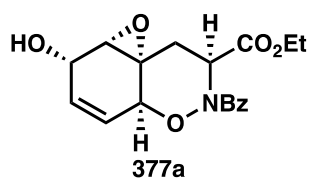

**SI-7**:  $^1\text{H}$  NMR (500 MHz,  $\text{CDCl}_3$ )  $\delta$  7.74 (d,  $J = 7.6$  Hz, 2H), 7.54 – 7.48 (m, 1H), 7.46 – 7.39 (m, 2H), 5.79 (d,  $J = 10.3$  Hz, 1H), 5.66 (s, 1H), 5.38 (s, 1H), 4.47 (s, 1H), 4.40 (s, 1H), 4.32 – 4.18 (m, 2H), 3.59 (t,  $J = 2.0$  Hz, 1H), 2.66 –

2.53 (m, 1H), 2.24 (d,  $J = 13.7$  Hz, 1H), 2.08 (s, 1H), 1.64 (s, 1H), 1.29 (t,  $J = 7.1$  Hz, 3H).

$^{13}\text{C}$  NMR (126 MHz,  $\text{CDCl}_3$ )  $\delta$  170.09, 168.74, 133.50, 131.72, 128.88, 128.16, 119.84, 76.90, 65.00, 62.29, 62.01, 56.89, 55.35, 30.65, 14.31.

**FTIR** (AT-IR) 3515.22, 2359.36, 2340.32, 1713.29, 1651.27, 1448.14, 1400.82, 1371.84, 1300.75, 1271.34, 1237.79, 1198.4, 1086.26, 1044.77, 1015.91, 974.42, 917.96, 850.56, 808.77, 791.48, 707.66, 668.00, 627.70  $\text{cm}^{-1}$

**HRMS** (TOF, ES+) calc'd for  $\text{C}_{18}\text{H}_{19}\text{NO}_6$   $[\text{M}+\text{H}]^+$  346.1285, found 346.1281 (ppm=1.20)

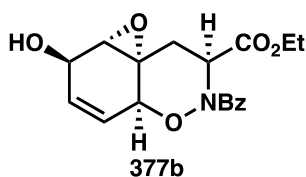

$^{13}\text{C}$  NMR (126 MHz,  $\text{CDCl}_3$ )  $\delta$  170.24, 168.80, 131.97, 131.75, 128.90, 128.18, 120.92, 76.79, 63.26, 62.39, 60.50, 55.64, 53.93, 30.96, 14.32.

**FTIR** (AT-IR) 3506.46, 2925.60, 2359.53, 2340.3, 1733.94, 1653.54, 1578.26, 1447.05, 1367.84, 1298.39, 1233.21, 1189.33, 1025.82, 905.79, 867.34, 831.29, 790.72, 768.16, 730.21, 706.66, 667.91  $\text{cm}^{-1}$

**HRMS** (TOF, ES+) calc'd for  $\text{C}_{18}\text{H}_{19}\text{NO}_6$   $[\text{M}+\text{H}]^+$  346.1285, found 346.1275 (ppm=1.20)

### 3. Single Crystal X-ray Diffraction Data

#### *Determination of enantiomeric series – desilylated S-hydroxylamine (p16469\_b)*

Crystal was obtained in analogy to **14** with 2-Br-benzoyl chloride. Material was recrystallized from  $\text{CHCl}_3$ /hexanes. Layer diffusion between 1:1  $\text{CHCl}_3$ /Hexanes and Hexanes yielded X-ray quality crystals of a desilylated hydroxylamine.

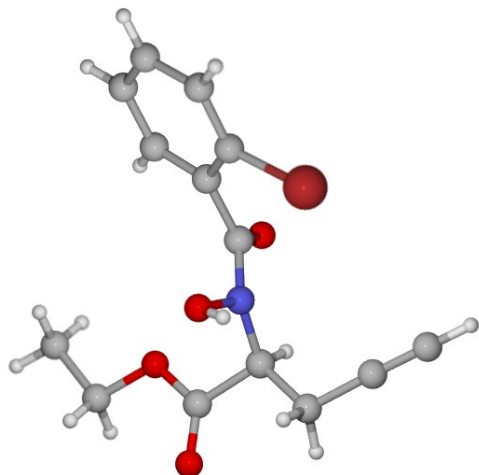

Table 1. Crystal data and structure refinement for final p16469\_b.

|                                   |                                                                 |                                                                          |
|-----------------------------------|-----------------------------------------------------------------|--------------------------------------------------------------------------|
| Identification code               | p16469_b                                                        |                                                                          |
| Empirical formula                 | C <sub>14</sub> H <sub>14</sub> BrN <sub>1</sub> O <sub>4</sub> |                                                                          |
| Formula weight                    | 340.17                                                          |                                                                          |
| Temperature                       | 100(2) K                                                        |                                                                          |
| Wavelength                        | 0.71073 Å                                                       |                                                                          |
| Crystal system                    | Monoclinic                                                      |                                                                          |
| Space group                       | P12 <sub>1</sub> 1                                              |                                                                          |
| Unit cell dimensions              | a = 8.6346(7) Å<br>b = 5.6380(5) Å<br>c = 15.6510(13) Å         | $\alpha = 90^\circ$<br>$\beta = 103.728(3)^\circ$<br>$\gamma = 90^\circ$ |
| Volume                            | 740.15(11) Å <sup>3</sup>                                       |                                                                          |
| Z                                 | 2                                                               |                                                                          |
| Density (calculated)              | 1.410 Mg/m <sup>3</sup>                                         |                                                                          |
| Absorption coefficient $\mu$      | 2.788 mm <sup>-1</sup>                                          |                                                                          |
| F(000)                            | 344                                                             |                                                                          |
| Crystal size                      | 0.23 × 0.15 × 0.07 mm <sup>3</sup>                              |                                                                          |
| Theta range for data collection   | 2.428 to 45.369°                                                |                                                                          |
| Index ranges                      | -16 ≤ h ≤ 17, -11 ≤ k ≤ 11, -31 ≤ l ≤ 31                        |                                                                          |
| Reflections collected             | 68030                                                           |                                                                          |
| Independent reflections           | 12256 [R(int) = 0.0378]                                         |                                                                          |
| Completeness to theta = 25.000°   | 99.7 %                                                          |                                                                          |
| Absorption correction             | Semi-empirical from equivalents                                 |                                                                          |
| Max. and min. transmission        | 0.747 and 0.716                                                 |                                                                          |
| Refinement method                 | Full-matrix least-squares on F <sup>2</sup>                     |                                                                          |
| Data / restraints / parameters    | 12256/1/183                                                     |                                                                          |
| Goodness-of-fit on F <sup>2</sup> | 0.989                                                           |                                                                          |
| Final R indices [I > 2σ(I)]       | R <sub>1</sub> = 0.0241, wR <sub>2</sub> = 0.0526               |                                                                          |
| R indices (all data)              | R <sub>1</sub> = 0.0305, wR <sub>2</sub> = 0.0541               |                                                                          |
| Extinction coefficient            | n/a                                                             |                                                                          |
| Largest diff. peak and hole       | 0.526 and -0.838 e.Å <sup>-3</sup>                              |                                                                          |

Table 2. Atomic coordinates ( $\times 10^4$ ) and equivalent isotropic displacement parameters ( $\text{Å}^2 \times 10^3$ ) for final p16469\_b.  $U(\text{eq})$  is defined as one third of the trace of the orthogonalized  $U^{\text{ij}}$  tensor.

|     | x          | y           | z          | $U_{\text{eq}}$ |
|-----|------------|-------------|------------|-----------------|
| Br1 | 0.15673(2) | 0.20544(3)  | 0.66433(2) | 0.02070(3)      |
| O1  | 0.86808(9) | 0.26712(16) | 0.92479(6) | 0.01991(14)     |

|     |             |             |            |             |
|-----|-------------|-------------|------------|-------------|
| O2  | 0.80569(9)  | 0.56641(15) | 0.82777(6) | 0.01865(13) |
| O3  | 0.54192(7)  | 0.19604(14) | 0.73103(4) | 0.01256(9)  |
| O4  | 0.492       | 0.0738      | 0.7396     | 0.019       |
| N1  | 0.43360(9)  | 0.76829(12) | 0.77810(5) | 0.01514(11) |
| C1  | 0.50418(9)  | 0.38290(13) | 0.78093(5) | 0.00968(10) |
| C2  | 0.77148(10) | 0.39468(16) | 0.87841(6) | 0.01261(12) |
| C3  | 0.59223(10) | 0.38553(15) | 0.87231(5) | 0.00991(11) |
| C4  | 0.5623      | 0.5331      | 0.9        | 0.012       |
| C5  | 0.55204(9)  | 0.17365(15) | 0.92407(5) | 0.01207(13) |
| C6  | 0.5754      | 0.025       | 0.8959     | 0.014       |
| C7  | 0.6205      | 0.1778      | 0.9845     | 0.014       |
| C8  | 0.38480(10) | 0.17397(16) | 0.92825(6) | 0.01385(14) |
| C9  | 0.24845(11) | 0.1758(2)   | 0.93395(7) | 0.01919(18) |
| C10 | 0.1407      | 0.1773      | 0.9384     | 0.023       |
| C11 | 0.43888(10) | 0.58063(14) | 0.73832(5) | 0.00977(11) |
| C12 | 0.37367(10) | 0.56879(15) | 0.64074(5) | 0.01081(11) |
| C13 | 0.25012(11) | 0.42021(17) | 0.59858(6) | 0.01398(13) |
| C14 | 0.18903(13) | 0.4296(2)   | 0.50811(7) | 0.01944(17) |

Table 3. Bond lengths [Å] and angles [°] for final p16469\_b

|           |            |
|-----------|------------|
| Br1–C8    | 1.8892(9)  |
| O1–C1     | 1.2052(12) |
| O2–C1     | 1.3282(11) |
| O2–C13    | 1.4559(13) |
| O3–H3     | 0.8400     |
| O3–N1     | 1.3953(10) |
| O4–C6     | 1.2340(11) |
| N1–C2     | 1.4518(11) |
| N1–C6     | 1.3517(11) |
| C1–C2     | 1.5288(12) |
| C2–H2     | 1.0000     |
| C2–C3     | 1.5287(11) |
| C3–H3A    | 0.9900     |
| C3–H3B    | 0.9900     |
| C3–C4     | 1.4610(11) |
| C4–C5     | 1.2017(12) |
| C5–H5     | 0.9500     |
| C6–C7     | 1.4986(11) |
| C7–C8     | 1.3932(13) |
| C7–C12    | 1.3987(12) |
| C8–C9     | 1.3899(14) |
| C9–H9     | 0.9500     |
| C9–C10    | 1.3905(15) |
| C10–H10   | 0.9500     |
| C10–C11   | 1.3858(16) |
| C11–H11   | 0.9500     |
| C11–C12   | 1.3931(13) |
| C12–H12   | 0.9500     |
| C13–H13A  | 0.9900     |
| C13–H13B  | 0.9900     |
| C13–C14   | 1.5054(17) |
| C14–H14A  | 0.9800     |
| C14–H14B  | 0.9800     |
| C14–H14C  | 0.9800     |
| C1–O2–C13 | 115.36(8)  |

|               |            |
|---------------|------------|
| N1–O3–H3      | 109.5      |
| O3–N1–C2      | 114.95(6)  |
| C6–N1–O3      | 118.17(7)  |
| C6–N1–C2      | 122.50(7)  |
| O1–C1–O2      | 125.05(9)  |
| O1–C1–C2      | 124.28(8)  |
| O2–C1–C2      | 110.65(8)  |
| N1–C2–C1      | 110.34(7)  |
| N1–C2–H2      | 107.8      |
| N1–C2–C3      | 112.48(7)  |
| C1–C2–H2      | 107.8      |
| C3–C2–C1      | 110.31(7)  |
| C3–C2–H2      | 107.8      |
| C2–C3–H3A     | 109.2      |
| C2–C3–H3B     | 109.2      |
| H3A–C3–H3B    | 107.9      |
| C4–C3–C2      | 111.95(7)  |
| C4–C3–H3A     | 109.2      |
| C4–C3–H3B     | 109.2      |
| C5–C4–C3      | 178.30(10) |
| C4–C5–H5      | 180.0      |
| O4–C6–N1      | 121.28(8)  |
| O4–C6–C7      | 120.17(8)  |
| N1–C6–C7      | 118.55(7)  |
| C8–C7–C6      | 124.73(7)  |
| C8–C7–C12     | 118.27(8)  |
| C12–C7–C6     | 116.78(8)  |
| C7–C8–Br1     | 120.35(6)  |
| C9–C8–Br1     | 118.14(7)  |
| C9–C8–C7      | 121.49(9)  |
| C8–C9–H9      | 120.4      |
| C8–C9–C10     | 119.29(10) |
| C10–C9–H9     | 120.4      |
| C9–C10–H10    | 119.8      |
| C11–C10–C9    | 120.33(9)  |
| C11–C10–H10   | 119.8      |
| C10–C11–H11   | 120.1      |
| C10–C11–C12   | 119.88(9)  |
| C12–C11–H11   | 120.1      |
| C7–C12–H12    | 119.6      |
| C11–C12–C7    | 120.70(9)  |
| C11–C12–H12   | 119.6      |
| O2–C13–H13A   | 110.3      |
| O2–C13–H13B   | 110.3      |
| O2–C13–C14    | 107.04(9)  |
| H13A–C13–H13B | 108.6      |
| C14–C13–H13A  | 110.3      |
| C14–C13–H13B  | 110.3      |
| C13–C14–H14A  | 109.5      |
| C13–C14–H14B  | 109.5      |
| C13–C14–H14C  | 109.5      |
| H14A–C14–H14B | 109.5      |
| H14A–C14–H14C | 109.5      |

Symmetry transformations used to generate equivalent atoms:

Table 4. Anisotropic displacement parameters ( $\text{\AA}^2$ ) for final p16469\_b. The anisotropic displacement factor exponent takes the form:  $-2p^2[h^2 a^*U^{11} + \dots + 2 h k a^* b^*U^{12}]$

|     | $U^{11}$   | $U^{22}$   | $U^{33}$   | $U^{23}$   | $U^{13}$   | $U^{12}$    |
|-----|------------|------------|------------|------------|------------|-------------|
| Br1 | 0.01666(4) | 0.02574(5) | 0.01784(4) | 0.00477(4) | 0.00036(3) | -0.01092(4) |

|     |           |           |           |              |             |             |
|-----|-----------|-----------|-----------|--------------|-------------|-------------|
| O1  | 0.0128(2) | 0.0248(4) | 0.0218(3) | 0.0102(3)    | 0.0035(2)   | 0.0027(2)   |
| O2  | 0.0128(2) | 0.0203(3) | 0.0226(3) | 0.0095(3)    | 0.0035(2)   | -0.0029(2)  |
| O3  | 0.0179(2) | 0.0080(2) | 0.0122(2) | -0.0020(2)   | 0.00421(17) | 0.0012(2)   |
| O4  | 0.0234(3) | 0.0083(2) | 0.0131(2) | -0.00124(19) | 0.0030(2)   | 0.0014(2)   |
| N1  | 0.0128(2) | 0.0076(2) | 0.0080(2) | -0.00085(18) | 0.00111(19) | 0.00054(19) |
| C1  | 0.0118(3) | 0.0137(3) | 0.0119(3) | 0.0014(2)    | 0.0019(2)   | -0.0021(2)  |
| C2  | 0.0109(3) | 0.0099(3) | 0.0084(3) | 0.0002(2)    | 0.0013(2)   | -0.0013(2)  |
| C3  | 0.0123(3) | 0.0127(4) | 0.0108(3) | 0.0025(2)    | 0.0019(2)   | -0.0012(2)  |
| C4  | 0.0139(3) | 0.0153(4) | 0.0119(3) | 0.0031(2)    | 0.0024(2)   | -0.0019(2)  |
| C5  | 0.0148(3) | 0.0245(5) | 0.0180(3) | 0.0066(3)    | 0.0035(3)   | -0.0002(3)  |
| C6  | 0.0115(3) | 0.0083(3) | 0.0095(3) | 0.0004(2)    | 0.0023(2)   | 0.0000(2)   |
| C7  | 0.0129(3) | 0.0101(3) | 0.0092(3) | 0.0010(2)    | 0.0023(2)   | -0.0001(2)  |
| C8  | 0.0126(3) | 0.0166(3) | 0.0114(3) | 0.0020(3)    | 0.0003(2)   | -0.0022(3)  |
| C9  | 0.0164(4) | 0.0268(5) | 0.0123(3) | 0.0014(3)    | -0.0022(3)  | -0.0031(3)  |
| C10 | 0.0211(4) | 0.0267(5) | 0.0104(3) | 0.0041(3)    | 0.0004(3)   | 0.0014(3)   |
| C11 | 0.0262(4) | 0.0187(5) | 0.0120(3) | 0.0044(3)    | 0.0058(3)   | -0.0009(3)  |
| C12 | 0.0216(3) | 0.0122(4) | 0.0122(3) | 0.0016(2)    | 0.0048(2)   | -0.0025(3)  |
| C13 | 0.0139(4) | 0.0264(5) | 0.0263(5) | 0.0092(4)    | 0.0048(3)   | -0.0038(3)  |
| C14 | 0.0238(5) | 0.0323(6) | 0.0394(7) | 0.0178(5)    | 0.0113(5)   | -0.0040(4)  |

*Conformational preferences of bicyclic tetrahydro-1,2-oxazine – epoxy allylic alcohol (a16027\_a)*

X-ray quality crystals of **SI-8** obtained layer diffusion between 1:1 CHCl<sub>3</sub>/hexanes and hexanes.

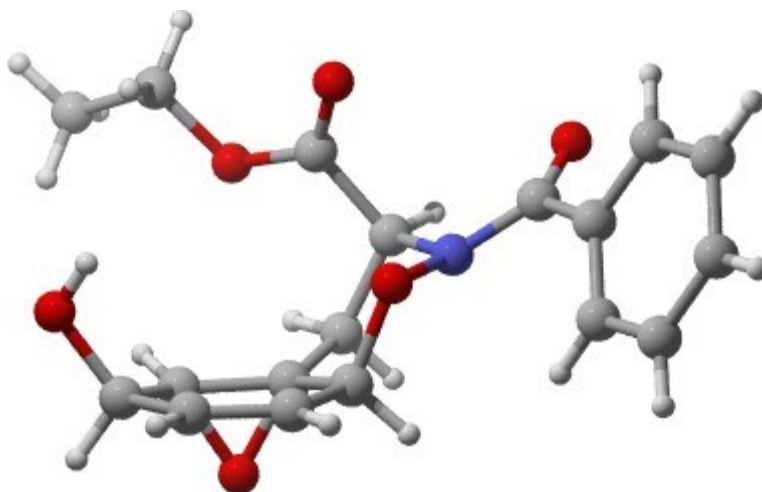

Table 1. Crystal data and structure refinement for a16027\_a.cif.

|                      |                                                  |                  |
|----------------------|--------------------------------------------------|------------------|
| Identification code  | a16027_a                                         |                  |
| Empirical formula    | C <sub>18</sub> H <sub>19</sub> N O <sub>6</sub> |                  |
| Formula weight       | 345.34                                           |                  |
| Temperature          | 99.99 K                                          |                  |
| Wavelength           | 0.71073 Å                                        |                  |
| Crystal system       | Triclinic                                        |                  |
| Space group          | P-1                                              |                  |
| Unit cell dimensions | a = 9.4539(6) Å                                  | ∠ = 114.437(3)°. |
|                      | b = 9.8703(7) Å                                  | ∠ = 105.326(3)°. |
|                      | c = 10.6887(7) Å                                 | ∠ = 102.469(3)°. |

|                                   |                                             |
|-----------------------------------|---------------------------------------------|
| Volume                            | 813.45(10) Å <sup>3</sup>                   |
| Z                                 | 2                                           |
| Density (calculated)              | 1.410 Mg/m <sup>3</sup>                     |
| Absorption coefficient            | 0.107 mm <sup>-1</sup>                      |
| F(000)                            | 364                                         |
| Crystal size                      | 0.8 x 0.45 x 0.35 mm <sup>3</sup>           |
| Theta range for data collection   | 2.281 to 37.744°.                           |
| Index ranges                      | -15<=h<=16, -16<=k<=16, -18<=l<=18          |
| Reflections collected             | 65383                                       |
| Independent reflections           | 8412 [R(int) = 0.0252]                      |
| Completeness to theta = 26.000°   | 99.9 %                                      |
| Absorption correction             | Semi-empirical from equivalents             |
| Max. and min. transmission        | 0.7474 and 0.7156                           |
| Refinement method                 | Full-matrix least-squares on F <sup>2</sup> |
| Data / restraints / parameters    | 8412 / 0 / 228                              |
| Goodness-of-fit on F <sup>2</sup> | 1.043                                       |
| Final R indices [I>2sigma(I)]     | R1 = 0.0343, wR2 = 0.1005                   |
| R indices (all data)              | R1 = 0.0395, wR2 = 0.1046                   |
| Extinction coefficient            | n/a                                         |
| Largest diff. peak and hole       | 0.555 and -0.205 e.Å <sup>-3</sup>          |

Table 2. Atomic coordinates ( $\times 10^4$ ) and equivalent isotropic displacement parameters ( $\text{Å}^2 \times 10^3$ ) for a16027\_a.  $U_{(\text{eq})}$  is defined as one third of the trace of the orthogonalized  $U_{ij}$  tensor.

|       | x        | y        | z       | U(eq) |
|-------|----------|----------|---------|-------|
| O(1)  | 6873(1)  | 5237(1)  | 993(1)  | 23(1) |
| O(2)  | 4078(1)  | 7342(1)  | 4849(1) | 21(1) |
| O(3)  | 1513(1)  | 4450(1)  | 837(1)  | 21(1) |
| O(4)  | 6198(1)  | 8195(1)  | 2623(1) | 12(1) |
| O(5)  | 10068(1) | 8470(1)  | 3357(1) | 20(1) |
| O(6)  | 5780(1)  | 4128(1)  | 2137(1) | 17(1) |
| N(1)  | 7672(1)  | 8243(1)  | 3435(1) | 13(1) |
| C(1)  | 6678(1)  | 5329(1)  | 2092(1) | 14(1) |
| C(2)  | 7469(1)  | 6856(1)  | 3630(1) | 14(1) |
| C(3)  | 6542(1)  | 6982(1)  | 4627(1) | 17(1) |
| C(4)  | 5059(1)  | 7241(1)  | 4009(1) | 14(1) |
| C(5)  | 3483(1)  | 6000(1)  | 3339(1) | 17(1) |
| C(6)  | 2082(1)  | 5930(1)  | 2205(1) | 18(1) |
| C(7)  | 2411(1)  | 7354(1)  | 1984(1) | 18(1) |
| C(8)  | 3827(1)  | 8515(1)  | 2614(1) | 17(1) |
| C(9)  | 5306(1)  | 8516(1)  | 3564(1) | 14(1) |
| C(10) | 8946(1)  | 8903(1)  | 3200(1) | 14(1) |
| C(11) | 8956(1)  | 10245(1) | 2885(1) | 15(1) |
| C(12) | 9779(1)  | 10449(1) | 2025(1) | 20(1) |
| C(13) | 9905(1)  | 11734(1) | 1767(1) | 26(1) |
| C(14) | 9229(1)  | 12823(1) | 2380(1) | 27(1) |
| C(15) | 8441(1)  | 12645(1) | 3270(1) | 23(1) |
| C(16) | 8295(1)  | 11352(1) | 3517(1) | 17(1) |
| C(17) | 4949(1)  | 2613(1)  | 725(1)  | 22(1) |
| C(18) | 4116(1)  | 1415(1)  | 1064(1) | 27(1) |

Table 3. Bond lengths [ $\text{Å}$ ] and angles [ $^\circ$ ] for a16027\_a

|           |           |
|-----------|-----------|
| O(1)-C(1) | 1.2069(7) |
| O(2)-C(4) | 1.4424(7) |

|                 |            |
|-----------------|------------|
| O(2)-C(5)       | 1.4510(7)  |
| O(3)-H(3)       | 0.8400     |
| O(3)-C(6)       | 1.4277(8)  |
| O(4)-N(1)       | 1.4127(6)  |
| O(4)-C(9)       | 1.4561(6)  |
| O(5)-C(10)      | 1.2234(7)  |
| O(6)-C(1)       | 1.3270(7)  |
| O(6)-C(17)      | 1.4591(7)  |
| N(1)-C(2)       | 1.4480(7)  |
| N(1)-C(10)      | 1.3767(7)  |
| C(1)-C(2)       | 1.5316(7)  |
| C(2)-H(2)       | 1.0000     |
| C(3)-H(3A)      | 0.9900     |
| C(3)-H(3B)      | 0.9900     |
| C(3)-C(4)       | 1.5075(8)  |
| C(4)-C(5)       | 1.4682(8)  |
| C(4)-C(9)       | 1.5140(8)  |
| C(5)-H(5)       | 1.0000     |
| C(5)-C(6)       | 1.5068(9)  |
| C(6)-H(6)       | 1.0000     |
| C(6)-C(7)       | 1.5011(8)  |
| C(7)-H(7)       | 0.9500     |
| C(7)-C(8)       | 1.3347(8)  |
| C(8)-H(8)       | 0.9500     |
| C(8)-C(9)       | 1.4944(8)  |
| C(9)-H(9)       | 1.0000     |
| C(10)-C(11)     | 1.4945(8)  |
| C(11)-C(12)     | 1.3977(8)  |
| C(11)-C(16)     | 1.3956(8)  |
| C(12)-H(12)     | 0.9500     |
| C(12)-C(13)     | 1.3932(10) |
| C(13)-H(13)     | 0.9500     |
| C(13)-C(14)     | 1.3882(12) |
| C(14)-H(14)     | 0.9500     |
| C(14)-C(15)     | 1.3950(10) |
| C(15)-H(15)     | 0.9500     |
| C(15)-C(16)     | 1.3928(8)  |
| C(16)-H(16)     | 0.9500     |
| C(17)-H(17A)    | 0.9900     |
| C(17)-H(17B)    | 0.9900     |
| C(17)-C(18)     | 1.5017(10) |
| C(18)-H(18A)    | 0.9800     |
| C(18)-H(18B)    | 0.9800     |
| C(18)-H(18C)    | 0.9800     |
|                 |            |
| C(4)-O(2)-C(5)  | 60.99(3)   |
| C(6)-O(3)-H(3)  | 109.5      |
| N(1)-O(4)-C(9)  | 109.45(4)  |
| C(1)-O(6)-C(17) | 116.14(5)  |
| O(4)-N(1)-C(2)  | 110.53(4)  |
| C(10)-N(1)-O(4) | 116.60(4)  |
| C(10)-N(1)-C(2) | 122.41(4)  |
| O(1)-C(1)-O(6)  | 124.83(5)  |
| O(1)-C(1)-C(2)  | 123.79(5)  |
| O(6)-C(1)-C(2)  | 111.38(4)  |
| N(1)-C(2)-C(1)  | 109.45(4)  |
| N(1)-C(2)-H(2)  | 108.5      |
| N(1)-C(2)-C(3)  | 107.27(4)  |
| C(1)-C(2)-H(2)  | 108.5      |
| C(1)-C(2)-C(3)  | 114.37(4)  |
| C(3)-C(2)-H(2)  | 108.5      |



|                     |           |
|---------------------|-----------|
| C(2)-C(3)-H(3A)     | 109.6     |
| C(2)-C(3)-H(3B)     | 109.6     |
| H(3A)-C(3)-H(3B)    | 108.1     |
| C(4)-C(3)-C(2)      | 110.42(4) |
| C(4)-C(3)-H(3A)     | 109.6     |
| C(4)-C(3)-H(3B)     | 109.6     |
| O(2)-C(4)-C(5)      | 59.80(4)  |
| O(2)-C(4)-C(9)      | 114.11(5) |
| C(3)-C(4)-C(9)      | 114.18(4) |
| C(5)-C(4)-C(3)      | 122.07(5) |
| C(5)-C(4)-C(9)      | 119.51(5) |
| O(2)-C(5)-C(4)      | 59.22(3)  |
| O(2)-C(5)-H(5)      | 115.7     |
| O(2)-C(5)-C(6)      | 115.76(5) |
| C(4)-C(5)-H(5)      | 115.7     |
| C(4)-C(5)-C(6)      | 122.52(5) |
| C(6)-C(5)-H(5)      | 115.7     |
| O(3)-C(6)-C(5)      | 109.05(5) |
| O(3)-C(6)-H(6)      | 107.2     |
| O(3)-C(6)-C(7)      | 112.48(5) |
| C(5)-C(6)-H(6)      | 107.2     |
| C(7)-C(6)-C(5)      | 113.46(5) |
| C(7)-C(6)-H(6)      | 107.2     |
| C(6)-C(7)-H(7)      | 117.8     |
| C(8)-C(7)-C(6)      | 124.41(5) |
| C(8)-C(7)-H(7)      | 117.8     |
| C(7)-C(8)-H(8)      | 117.9     |
| C(7)-C(8)-C(9)      | 124.22(5) |
| C(9)-C(8)-H(8)      | 117.9     |
| O(4)-C(9)-C(4)      | 108.30(4) |
| O(4)-C(9)-C(8)      | 104.16(4) |
| O(4)-C(9)-H(9)      | 109.8     |
| C(4)-C(9)-H(9)      | 109.8     |
| C(8)-C(9)-C(4)      | 114.81(4) |
| C(8)-C(9)-H(9)      | 109.8     |
| O(5)-C(10)-N(1)     | 120.20(5) |
| O(5)-C(10)-C(11)    | 122.11(5) |
| N(1)-C(10)-C(11)    | 117.49(4) |
| C(12)-C(11)-C(10)   | 117.52(5) |
| C(16)-C(11)-C(10)   | 122.35(5) |
| C(16)-C(11)-C(12)   | 119.92(5) |
| C(11)-C(12)-H(12)   | 120.0     |
| C(13)-C(12)-C(11)   | 120.05(6) |
| C(13)-C(12)-H(12)   | 120.0     |
| C(12)-C(13)-H(13)   | 120.0     |
| C(14)-C(13)-C(12)   | 119.93(6) |
| C(14)-C(13)-H(13)   | 120.0     |
| C(13)-C(14)-H(14)   | 119.9     |
| C(13)-C(14)-C(15)   | 120.18(6) |
| C(15)-C(14)-H(14)   | 119.9     |
| C(14)-C(15)-H(15)   | 119.9     |
| C(16)-C(15)-C(14)   | 120.11(6) |
| C(16)-C(15)-H(15)   | 119.9     |
| C(11)-C(16)-H(16)   | 120.1     |
| C(15)-C(16)-C(11)   | 119.79(5) |
| C(15)-C(16)-H(16)   | 120.1     |
| O(6)-C(17)-H(17A)   | 110.4     |
| O(6)-C(17)-H(17B)   | 110.4     |
| O(6)-C(17)-C(18)    | 106.77(5) |
| H(17A)-C(17)-H(17B) | 108.6     |
| C(18)-C(17)-H(17A)  | 110.4     |

|                     |       |
|---------------------|-------|
| C(18)-C(17)-H(17B)  | 110.4 |
| C(17)-C(18)-H(18A)  | 109.5 |
| C(17)-C(18)-H(18B)  | 109.5 |
| C(17)-C(18)-H(18C)  | 109.5 |
| H(18A)-C(18)-H(18B) | 109.5 |
| H(18A)-C(18)-H(18C) | 109.5 |
| H(18B)-C(18)-H(18C) | 109.5 |

Symmetry transformations used to generate equivalent atoms:

Table 4. Anisotropic displacement parameters ( $\text{\AA}^2 \times 10^3$ ) for a16027\_a. The anisotropic displacement factor exponent takes the form:  $-2p2[ h_2 a^* 2U_{11} + \dots + 2 h k a^* b^* U_{12} ]$

|       | $U^{11}$ | $U^{22}$ | $U^{33}$ | $U^{23}$ | $U^{13}$ | $U^{12}$ |
|-------|----------|----------|----------|----------|----------|----------|
| O(1)  | 34(1)    | 20(1)    | 18(1)    | 9(1)     | 16(1)    | 9(1)     |
| O(2)  | 23(1)    | 22(1)    | 17(1)    | 6(1)     | 14(1)    | 4(1)     |
| O(3)  | 19(1)    | 17(1)    | 21(1)    | 8(1)     | 7(1)     | 0(1)     |
| O(4)  | 9(1)     | 14(1)    | 14(1)    | 6(1)     | 6(1)     | 5(1)     |
| O(5)  | 15(1)    | 29(1)    | 24(1)    | 15(1)    | 10(1)    | 13(1)    |
| O(6)  | 23(1)    | 12(1)    | 15(1)    | 7(1)     | 6(1)     | 5(1)     |
| N(1)  | 10(1)    | 14(1)    | 16(1)    | 8(1)     | 5(1)     | 4(1)     |
| C(1)  | 18(1)    | 13(1)    | 15(1)    | 8(1)     | 7(1)     | 8(1)     |
| C(2)  | 14(1)    | 15(1)    | 13(1)    | 7(1)     | 5(1)     | 5(1)     |
| C(3)  | 18(1)    | 19(1)    | 11(1)    | 7(1)     | 5(1)     | 5(1)     |
| C(4)  | 16(1)    | 14(1)    | 12(1)    | 5(1)     | 8(1)     | 4(1)     |
| C(5)  | 18(1)    | 15(1)    | 16(1)    | 8(1)     | 10(1)    | 3(1)     |
| C(6)  | 14(1)    | 16(1)    | 22(1)    | 9(1)     | 10(1)    | 3(1)     |
| C(7)  | 13(1)    | 18(1)    | 27(1)    | 12(1)    | 11(1)    | 7(1)     |
| C(8)  | 14(1)    | 14(1)    | 26(1)    | 11(1)    | 11(1)    | 7(1)     |
| C(9)  | 13(1)    | 12(1)    | 16(1)    | 5(1)     | 9(1)     | 4(1)     |
| C(10) | 11(1)    | 17(1)    | 13(1)    | 7(1)     | 6(1)     | 5(1)     |
| C(11) | 10(1)    | 18(1)    | 15(1)    | 9(1)     | 5(1)     | 3(1)     |
| C(12) | 14(1)    | 28(1)    | 20(1)    | 13(1)    | 8(1)     | 4(1)     |
| C(13) | 17(1)    | 34(1)    | 27(1)    | 21(1)    | 8(1)     | 2(1)     |
| C(14) | 19(1)    | 27(1)    | 34(1)    | 23(1)    | 6(1)     | 1(1)     |
| C(15) | 17(1)    | 19(1)    | 31(1)    | 16(1)    | 7(1)     | 4(1)     |
| C(16) | 13(1)    | 17(1)    | 21(1)    | 10(1)    | 7(1)     | 4(1)     |
| C(17) | 30(1)    | 13(1)    | 17(1)    | 5(1)     | 6(1)     | 6(1)     |
| C(18) | 23(1)    | 18(1)    | 28(1)    | 11(1)    | 3(1)     | 0(1)     |

4.

Table 5. Hydrogen coordinates ( $\times 10^4$ ) and isotropic displacement parameters ( $\text{\AA}^2 \times 10^3$ ) for a16027\_a.

|       | x    | y    | z    | U(eq) |
|-------|------|------|------|-------|
| H(3)  | 2000 | 4558 | 310  | 31    |
| H(2)  | 8535 | 6899 | 4164 | 17    |
| H(3A) | 6262 | 5987 | 4680 | 20    |
| H(3B) | 7208 | 7887 | 5655 | 20    |
| H(5)  | 3460 | 4949 | 3261 | 20    |
| H(6)  | 1229 | 5920 | 2593 | 21    |

H(7)

1553

7434

1352

22

|        |       |       |      |    |
|--------|-------|-------|------|----|
| H(8)   | 3900  | 9397  | 2448 | 20 |
| H(9)   | 5908  | 9597  | 4480 | 17 |
| H(12)  | 10252 | 9711  | 1616 | 24 |
| H(13)  | 10453 | 11866 | 1172 | 31 |
| H(14)  | 9304  | 13692 | 2194 | 32 |
| H(15)  | 8003  | 13407 | 3708 | 27 |
| H(16)  | 7748  | 11224 | 4113 | 20 |
| H(17A) | 5707  | 2261  | 308  | 27 |
| H(17B) | 4178  | 2734  | -14  | 27 |
| H(18A) | 3545  | 373   | 142  | 40 |
| H(18B) | 3366  | 1775  | 1470 | 40 |
| H(18C) | 4892  | 1313  | 1801 | 40 |

---

Table 6. Torsion angles [°] for a16027\_a.

|                        |            |
|------------------------|------------|
| O(1)-C(1)-C(2)-N(1)    | 32.43(7)   |
| O(1)-C(1)-C(2)-C(3)    | 152.80(6)  |
| O(2)-C(4)-C(5)-C(6)    | 102.72(6)  |
| O(2)-C(4)-C(9)-O(4)    | -175.31(4) |
| O(2)-C(4)-C(9)-C(8)    | -59.41(6)  |
| O(2)-C(5)-C(6)-O(3)    | -172.59(4) |
| O(2)-C(5)-C(6)-C(7)    | 61.20(6)   |
| O(3)-C(6)-C(7)-C(8)    | -118.76(6) |
| O(4)-N(1)-C(2)-C(1)    | 59.09(5)   |
| O(4)-N(1)-C(2)-C(3)    | -65.52(5)  |
| O(4)-N(1)-C(10)-O(5)   | -151.78(5) |
| O(4)-N(1)-C(10)-C(11)  | 33.40(6)   |
| O(5)-C(10)-C(11)-C(12) | 33.04(8)   |
| O(5)-C(10)-C(11)-C(16) | -141.58(6) |
| O(6)-C(1)-C(2)-N(1)    | -148.56(4) |
| O(6)-C(1)-C(2)-C(3)    | -28.19(6)  |
| N(1)-O(4)-C(9)-C(4)    | -60.15(5)  |
| N(1)-O(4)-C(9)-C(8)    | 177.21(4)  |
| N(1)-C(2)-C(3)-C(4)    | 52.05(5)   |
| N(1)-C(10)-C(11)-C(12) | -152.25(5) |
| N(1)-C(10)-C(11)-C(16) | 33.14(7)   |
| C(1)-O(6)-C(17)-C(18)  | 175.96(5)  |
| C(1)-C(2)-C(3)-C(4)    | -69.52(6)  |
| C(2)-N(1)-C(10)-O(5)   | -10.28(8)  |
| C(2)-N(1)-C(10)-C(11)  | 174.90(4)  |
| C(2)-C(3)-C(4)-O(2)    | 178.71(4)  |
| C(2)-C(3)-C(4)-C(5)    | 110.02(5)  |
| C(2)-C(3)-C(4)-C(9)    | -46.69(6)  |
| C(3)-C(4)-C(5)-O(2)    | 102.16(5)  |
| C(3)-C(4)-C(5)-C(6)    | -155.13(5) |
| C(3)-C(4)-C(9)-O(4)    | 49.71(6)   |
| C(3)-C(4)-C(9)-C(8)    | 165.61(4)  |
| C(4)-O(2)-C(5)-C(6)    | -114.03(5) |
| C(4)-C(5)-C(6)-O(3)    | 118.90(5)  |
| C(4)-C(5)-C(6)-C(7)    | -7.31(8)   |
| C(5)-O(2)-C(4)-C(3)    | -114.02(5) |
| C(5)-O(2)-C(4)-C(9)    | 111.34(5)  |
| C(5)-C(4)-C(9)-O(4)    | -107.64(5) |
| C(5)-C(4)-C(9)-C(8)    | 8.26(7)    |
| C(5)-C(6)-C(7)-C(8)    | 5.62(8)    |

|                         |            |
|-------------------------|------------|
| C(6)-C(7)-C(8)-C(9)     | 3.49(9)    |
| C(7)-C(8)-C(9)-O(4)     | 107.72(6)  |
| C(7)-C(8)-C(9)-C(4)     | -10.54(8)  |
| C(9)-O(4)-N(1)-C(2)     | 71.68(5)   |
| C(9)-O(4)-N(1)-C(10)    | -142.45(4) |
| C(9)-C(4)-C(5)-O(2)     | -102.33(5) |
| C(9)-C(4)-C(5)-C(6)     | 0.39(8)    |
| C(10)-N(1)-C(2)-C(1)    | -84.44(6)  |
| C(10)-N(1)-C(2)-C(3)    | 150.94(5)  |
| C(10)-C(11)-C(12)-C(13) | -176.34(5) |
| C(10)-C(11)-C(16)-C(15) | 175.33(5)  |
| C(11)-C(12)-C(13)-C(14) | 0.77(9)    |
| C(12)-C(11)-C(16)-C(15) | 0.83(8)    |
| C(12)-C(13)-C(14)-C(15) | 0.80(10)   |
| C(13)-C(14)-C(15)-C(16) | -1.55(10)  |
| C(14)-C(15)-C(16)-C(11) | 0.73(9)    |
| C(16)-C(11)-C(12)-C(13) | -1.59(8)   |
| C(17)-O(6)-C(1)-O(1)    | -1.75(8)   |
| C(17)-O(6)-C(1)-C(2)    | 179.25(5)  |

---

Symmetry transformations used to generate equivalent atoms:

#### 4. $^1\text{H}$ and $^{13}\text{C}$ NMR Spectral Data

| Parameter                 | Value                                        |
|---------------------------|----------------------------------------------|
| 1 Data File Name          | /Volumes/data-1/nc-6-Et-TBS-oxime-1H.fid/fid |
| 2 Title                   | nc-6-Et-TBS-oxime-1H                         |
| 3 Origin                  | Varian                                       |
| 4 Spectrometer            | nmrs                                         |
| 5 Solvent                 | cdcl3                                        |
| 6 Temperature             | 50.0                                         |
| 7 Pulse Sequence          | s2pul                                        |
| 8 Experiment              | 1D                                           |
| 9 Probe                   | OneNMR                                       |
| 10 Number of Scans        | 1                                            |
| 11 Receiver Gain          | 18                                           |
| 12 Relaxation Delay       | 1.0000                                       |
| 13 Pulse Width            | 4.1500                                       |
| 14 Acquisition Date       | 2018-05-28T01:31:30                          |
| 15 Spectrometer Frequency | 399.80                                       |
| 16 Spectral Width         | 6410.3                                       |
| 17 Lowest Frequency       | -805.6                                       |
| 18 Nucleus                | $^1\text{H}$                                 |
| 19 Acquired Size          | 16384                                        |
| 20 Spectral Size          | 65536                                        |

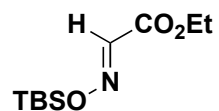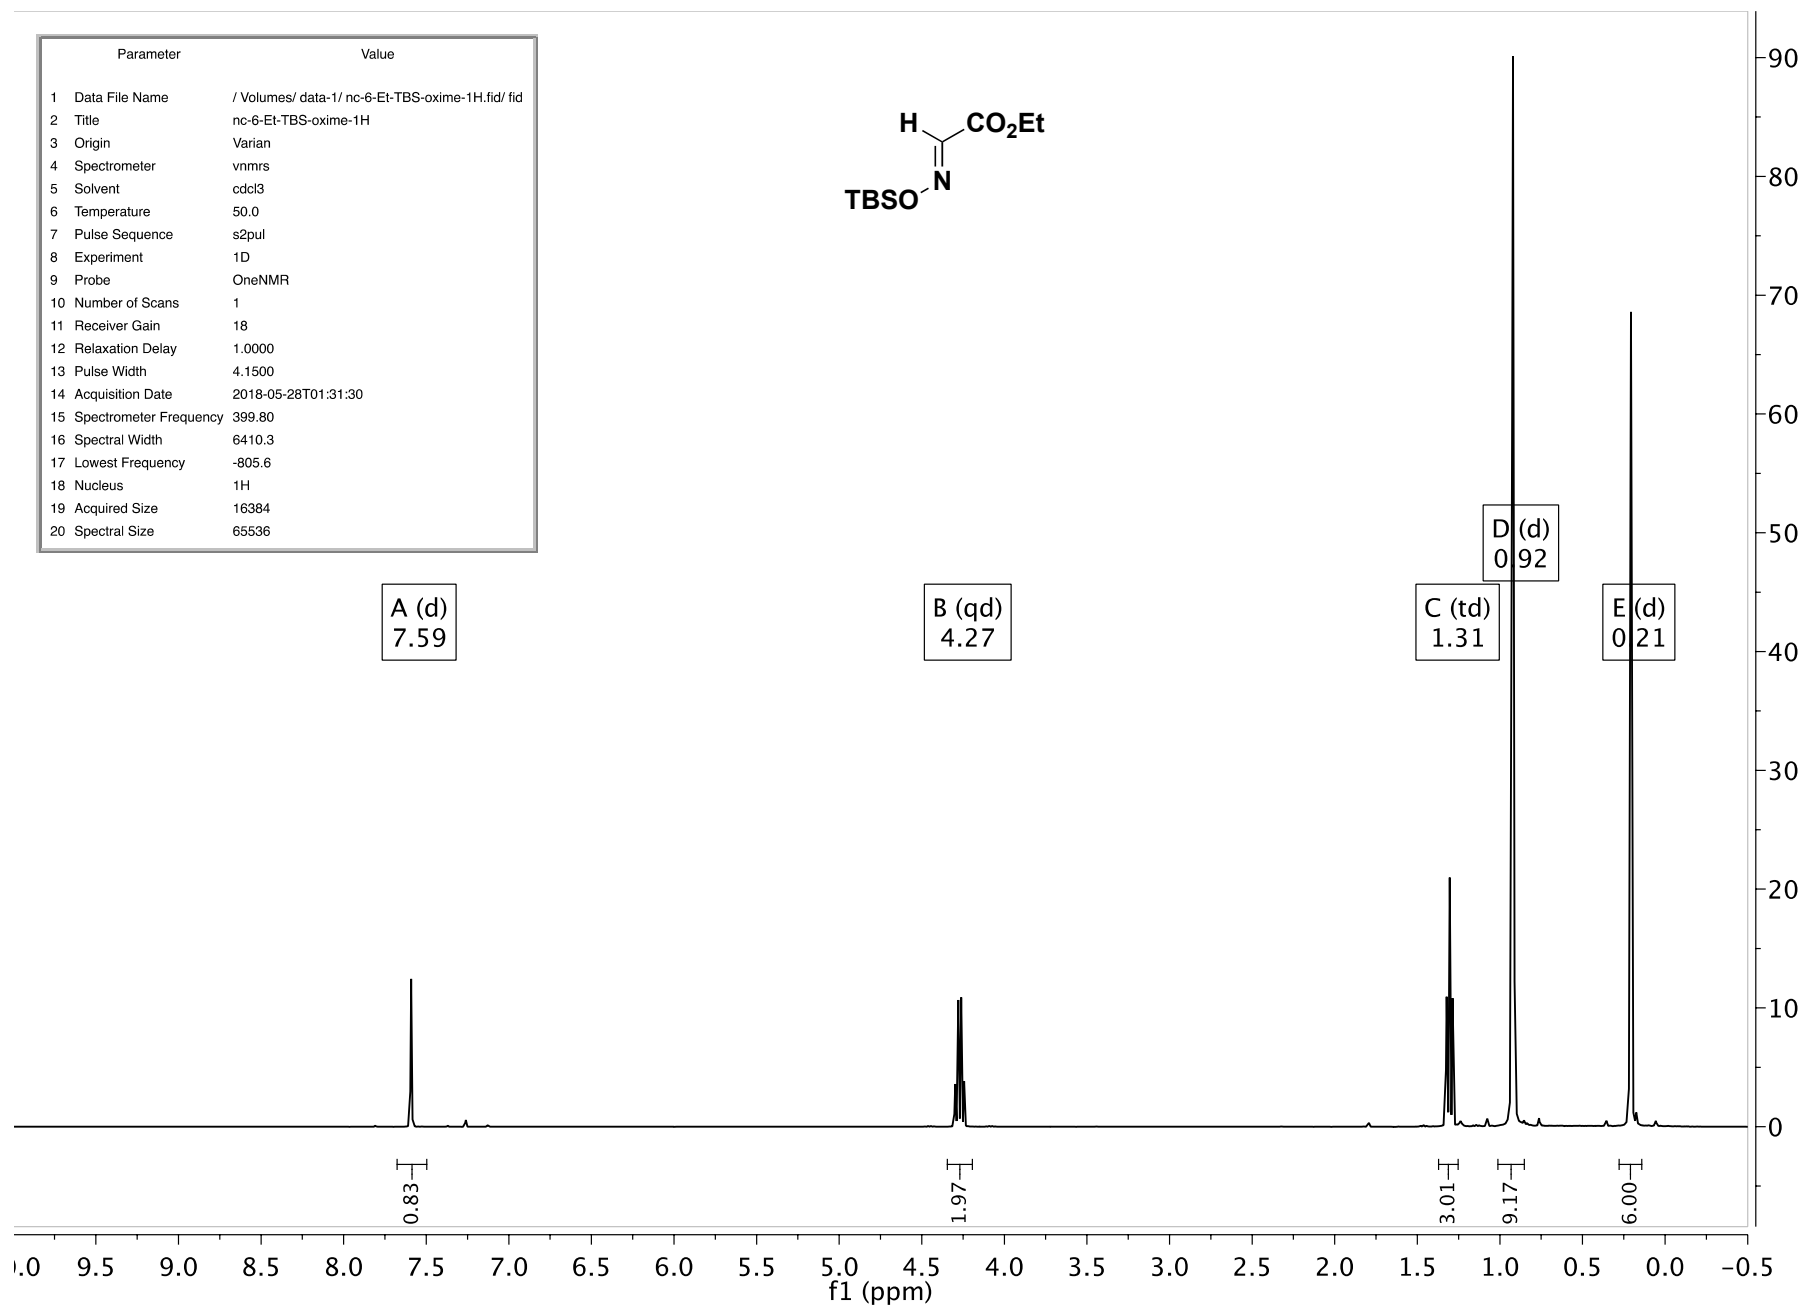

S38

| Parameter                 | Value                                         |
|---------------------------|-----------------------------------------------|
| 1 Data File Name          | /Volumes/data-1/nc-6-Et-TBS-oxime-13C.fid/fid |
| 2 Title                   | nc-6-Et-TBS-oxime-13C                         |
| 3 Origin                  | Varian                                        |
| 4 Spectrometer            | vnmrs                                         |
| 5 Solvent                 | cdcl3                                         |
| 6 Temperature             | 50.0                                          |
| 7 Pulse Sequence          | s2pul                                         |
| 8 Experiment              | 1D                                            |
| 9 Probe                   | OneNMR                                        |
| 10 Number of Scans        | 48                                            |
| 11 Receiver Gain          | 60                                            |
| 12 Relaxation Delay       | 1.0000                                        |
| 13 Pulse Width            | 3.5125                                        |
| 14 Acquisition Date       | 2018-05-28T01:32:13                           |
| 15 Spectrometer Frequency | 100.54                                        |
| 16 Spectral Width         | 25000.0                                       |
| 17 Lowest Frequency       | -1425.8                                       |
| 18 Nucleus                | 13C                                           |
| 19 Acquired Size          | 32768                                         |
| 20 Spectral Size          | 65536                                         |

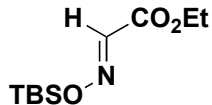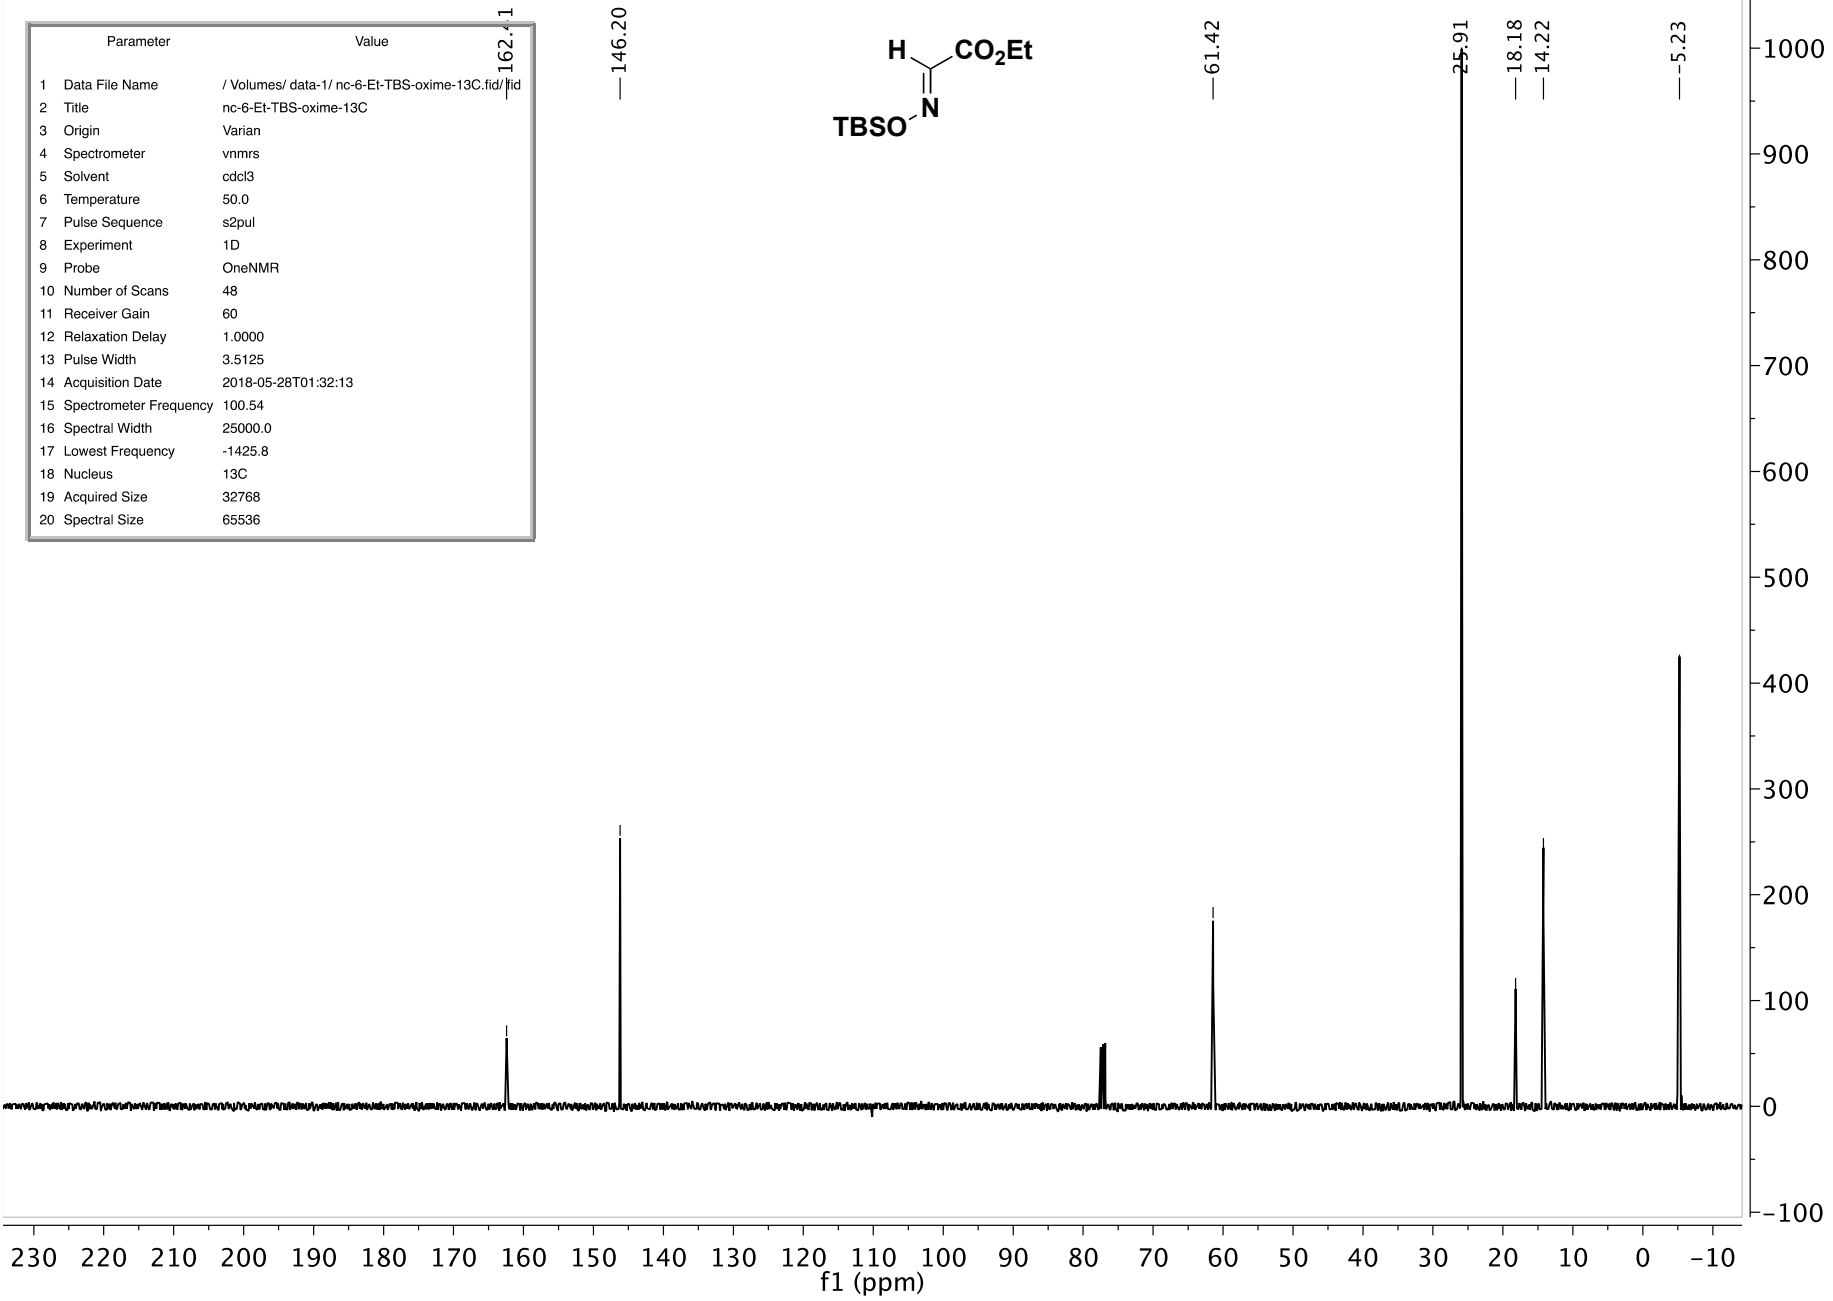

| Parameter                 | Value                                      |
|---------------------------|--------------------------------------------|
| 1 Data File Name          | /Volumes/nmr/nc-7-et-NH-alkyne/1/fid       |
| 2 Title                   | nc-7-et-NH-alkyne.1.fid                    |
| 3 Origin                  | Bruker BioSpin GmbH                        |
| 4 Solvent                 | CDCl3                                      |
| 5 Temperature             | 297.2                                      |
| 6 Pulse Sequence          | zg30                                       |
| 7 Probe                   | Z122623_0045 (CPP BBO 400S1 BB-H&F-D-05 Z) |
| 8 Number of Scans         | 16                                         |
| 9 Receiver Gain           | 10.0                                       |
| 10 Relaxation Delay       | 1.0000                                     |
| 11 Pulse Width            | 11.7000                                    |
| 12 Acquisition Time       | 4.0894                                     |
| 13 Acquisition Date       | 2018-06-08T17:21:52                        |
| 14 Spectrometer Frequency | 400.13                                     |
| 15 Spectral Width         | 8012.8                                     |
| 16 Lowest Frequency       | -1545.0                                    |
| 17 Nucleus                | 1H                                         |
| 18 Acquired Size          | 32768                                      |
| 19 Spectral Size          | 65536                                      |
| 20 Absolute Reference     |                                            |

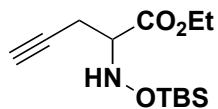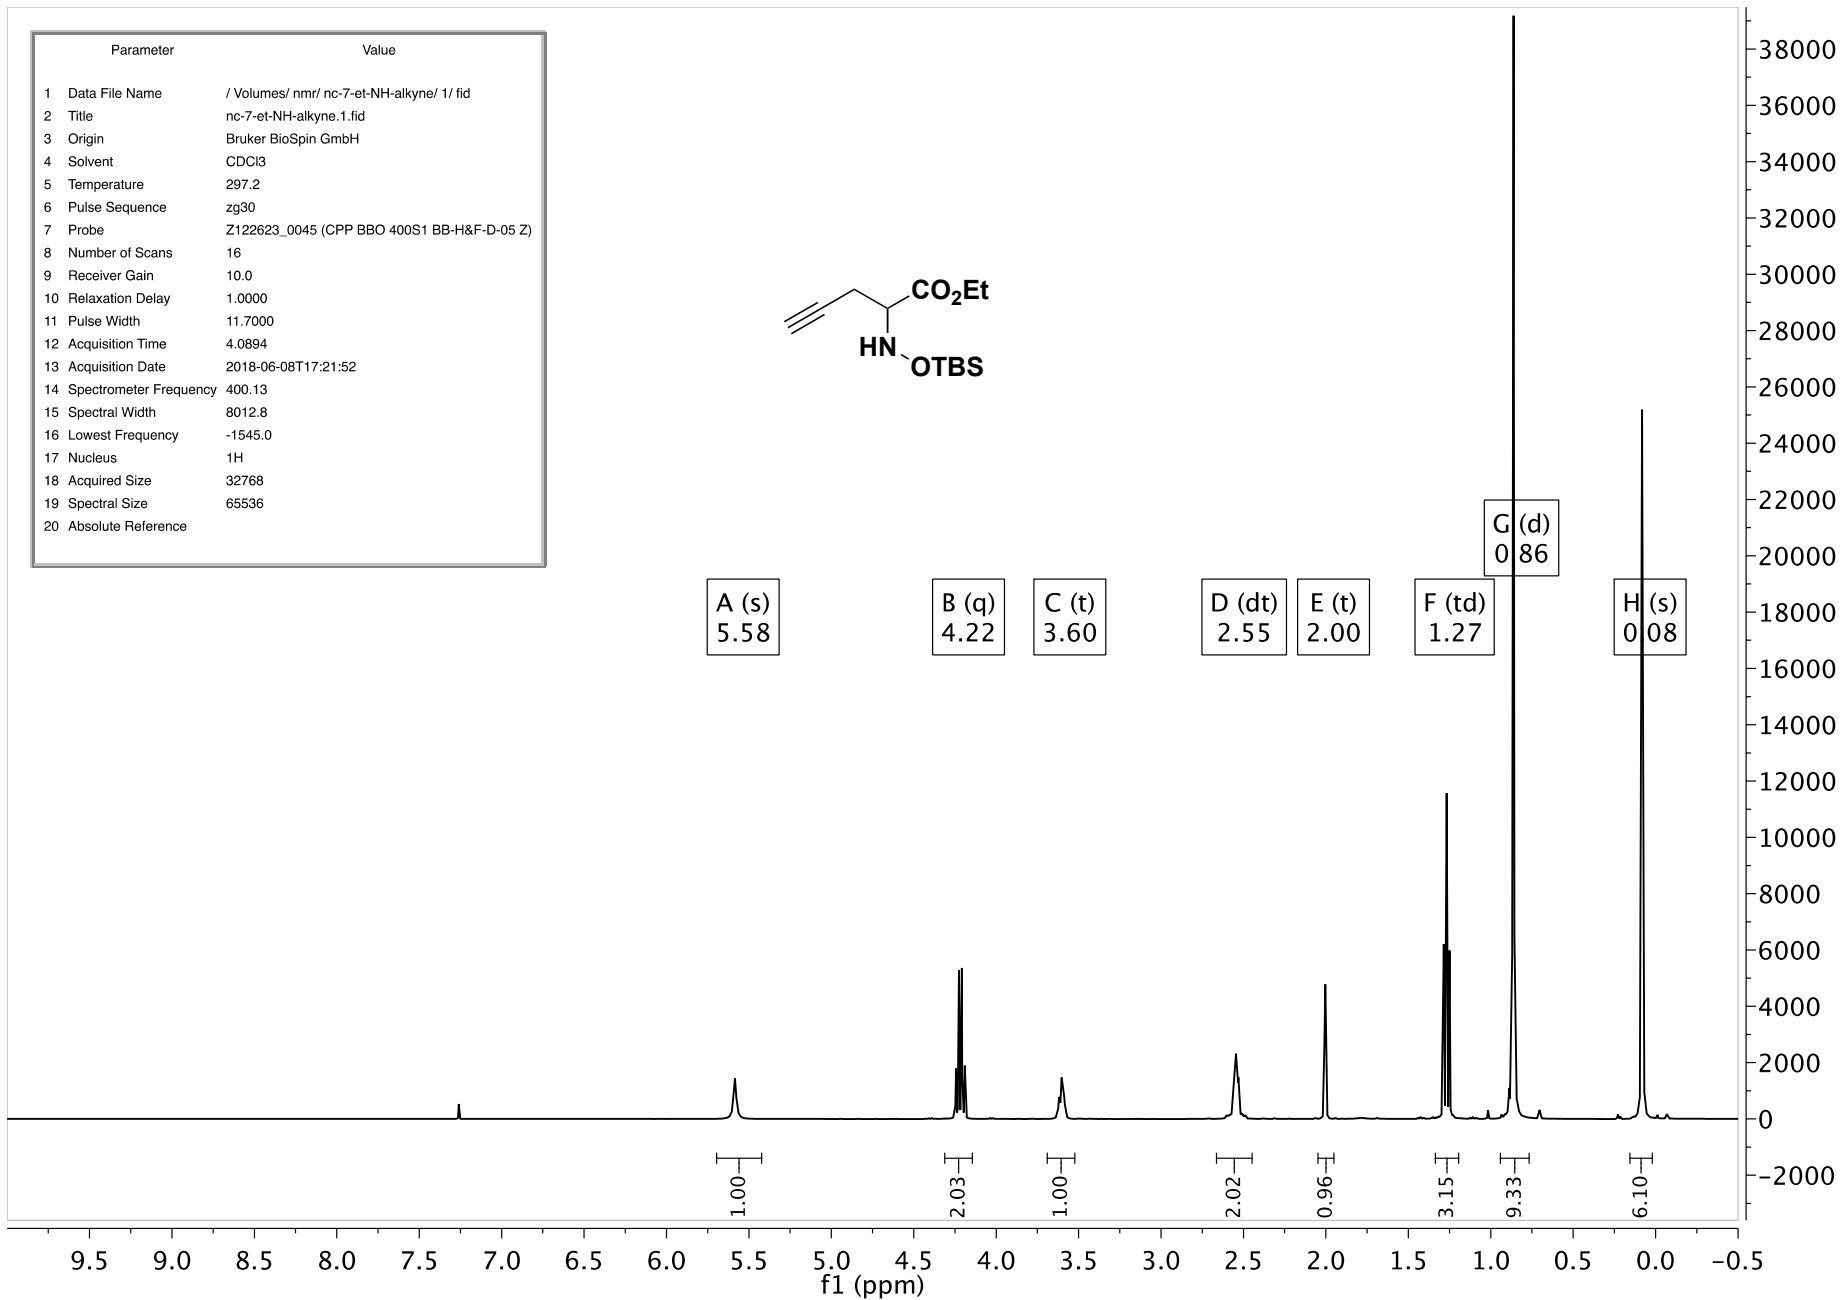



| Parameter                 | Value                                           |
|---------------------------|-------------------------------------------------|
| 1 Data File Name          | /Volumes/nmr/nc-7- <sup>13</sup> C-alkyne/3/fid |
| 2 Title                   | nc-7- <sup>13</sup> C-alkyne.3.fid              |
| 3 Origin                  | Bruker BioSpin GmbH                             |
| 4 Solvent                 | CDCl <sub>3</sub>                               |
| 5 Temperature             | 297.2                                           |
| 6 Pulse Sequence          | zgpg30                                          |
| 7 Probe                   | Z122623_0045 (CPP BBO 400S1 BB-H&F-D-05 Z)      |
| 8 Number of Scans         | 512                                             |
| 9 Receiver Gain           | 87.8                                            |
| 10 Relaxation Delay       | 1.0000                                          |
| 11 Pulse Width            | 10.0000                                         |
| 12 Acquisition Time       | 1.3631                                          |
| 13 Acquisition Date       | 2018-06-08T17:55:02                             |
| 14 Spectrometer Frequency | 100.62                                          |
| 15 Spectral Width         | 24038.5                                         |
| 16 Lowest Frequency       | -1947.2                                         |
| 17 Nucleus                | <sup>13</sup> C                                 |
| 18 Acquired Size          | 32768                                           |
| 19 Spectral Size          | 65536                                           |
| 20 Absolute Reference     |                                                 |

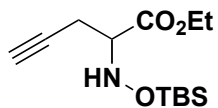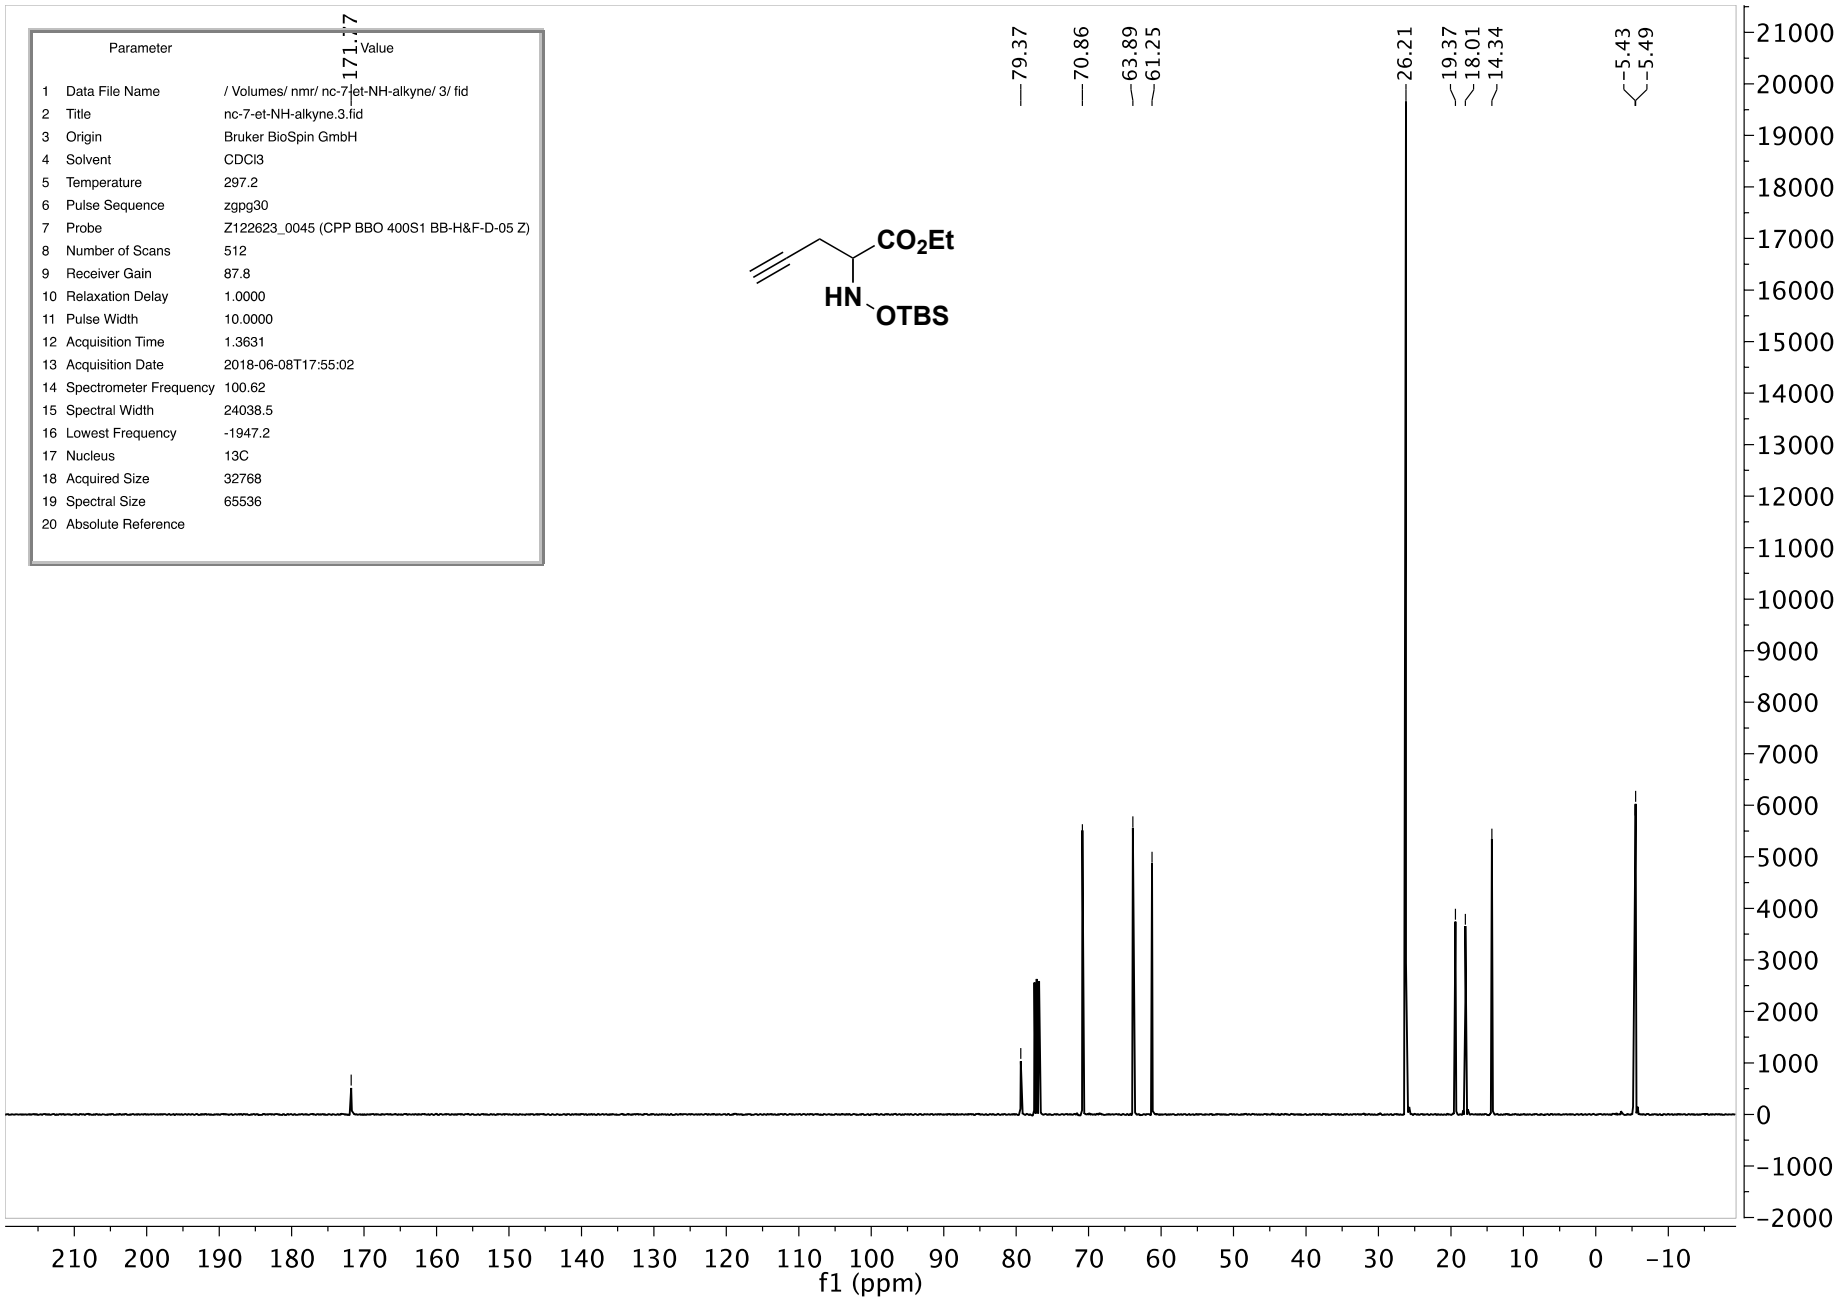

| Parameter                 | Value                                       |
|---------------------------|---------------------------------------------|
| 1 Data File Name          | / Volumes/ data/ nc-7-et-NH-allene.fid/ fid |
| 2 Title                   | nc-7-et-NH-allene                           |
| 3 Origin                  | Varian                                      |
| 4 Spectrometer            | vnmsr                                       |
| 5 Solvent                 | cdcl3                                       |
| 6 Temperature             | 50.0                                        |
| 7 Pulse Sequence          | s2pul                                       |
| 8 Experiment              | 1D                                          |
| 9 Probe                   | OneNMR                                      |
| 10 Number of Scans        | 1                                           |
| 11 Receiver Gain          | 14                                          |
| 12 Relaxation Delay       | 1.0000                                      |
| 13 Pulse Width            | 4.1500                                      |
| 14 Acquisition Date       | 2018-06-08T17:21:49                         |
| 15 Spectrometer Frequency | 399.80                                      |
| 16 Spectral Width         | 6410.3                                      |
| 17 Lowest Frequency       | -702.8                                      |
| 18 Nucleus                | <sup>1</sup> H                              |
| 19 Acquired Size          | 64103                                       |
| 20 Spectral Size          | 65536                                       |

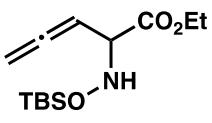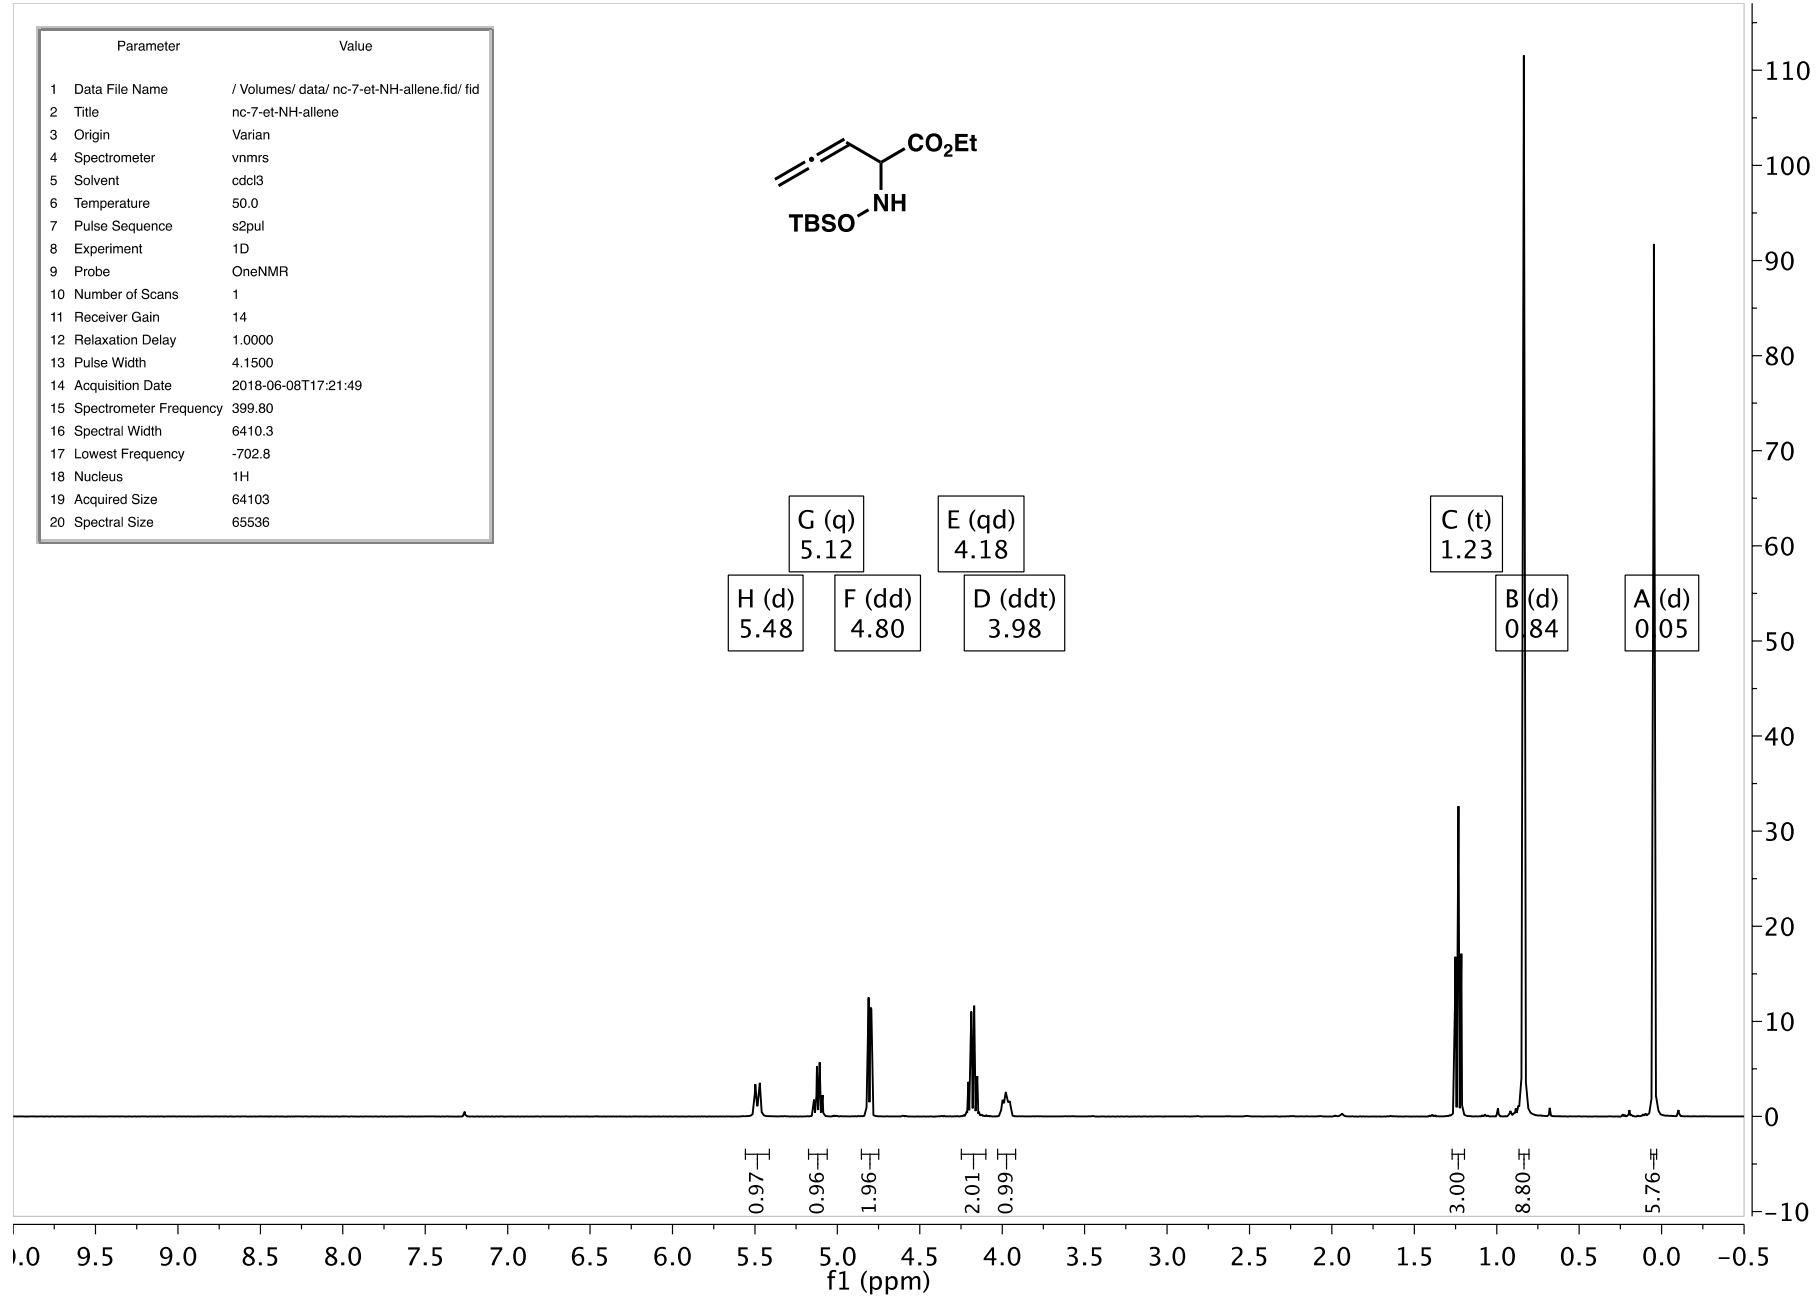



| Parameter                 | Value                                          |
|---------------------------|------------------------------------------------|
| 1 Data File Name          | /Volumes/ data/ nc-7-et-NH-allene-13C.fid/ fid |
| 2 Title                   | nc-7-et-NH-allene-13C                          |
| 3 Origin                  | Varian                                         |
| 4 Spectrometer            | vnmsr                                          |
| 5 Solvent                 | cdcl3                                          |
| 6 Temperature             | 50.0                                           |
| 7 Pulse Sequence          | s2pul                                          |
| 8 Experiment              | 1D                                             |
| 9 Probe                   | OneNMR                                         |
| 10 Number of Scans        | 100                                            |
| 11 Receiver Gain          | 60                                             |
| 12 Relaxation Delay       | 1.0000                                         |
| 13 Pulse Width            | 3.5125                                         |
| 14 Acquisition Date       | 2018-06-08T17:23:18                            |
| 15 Spectrometer Frequency | 100.54                                         |
| 16 Spectral Width         | 25000.0                                        |
| 17 Lowest Frequency       | -1411.6                                        |
| 18 Nucleus                | 13C                                            |
| 19 Acquired Size          | 32768                                          |
| 20 Spectral Size          | 65536                                          |

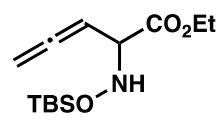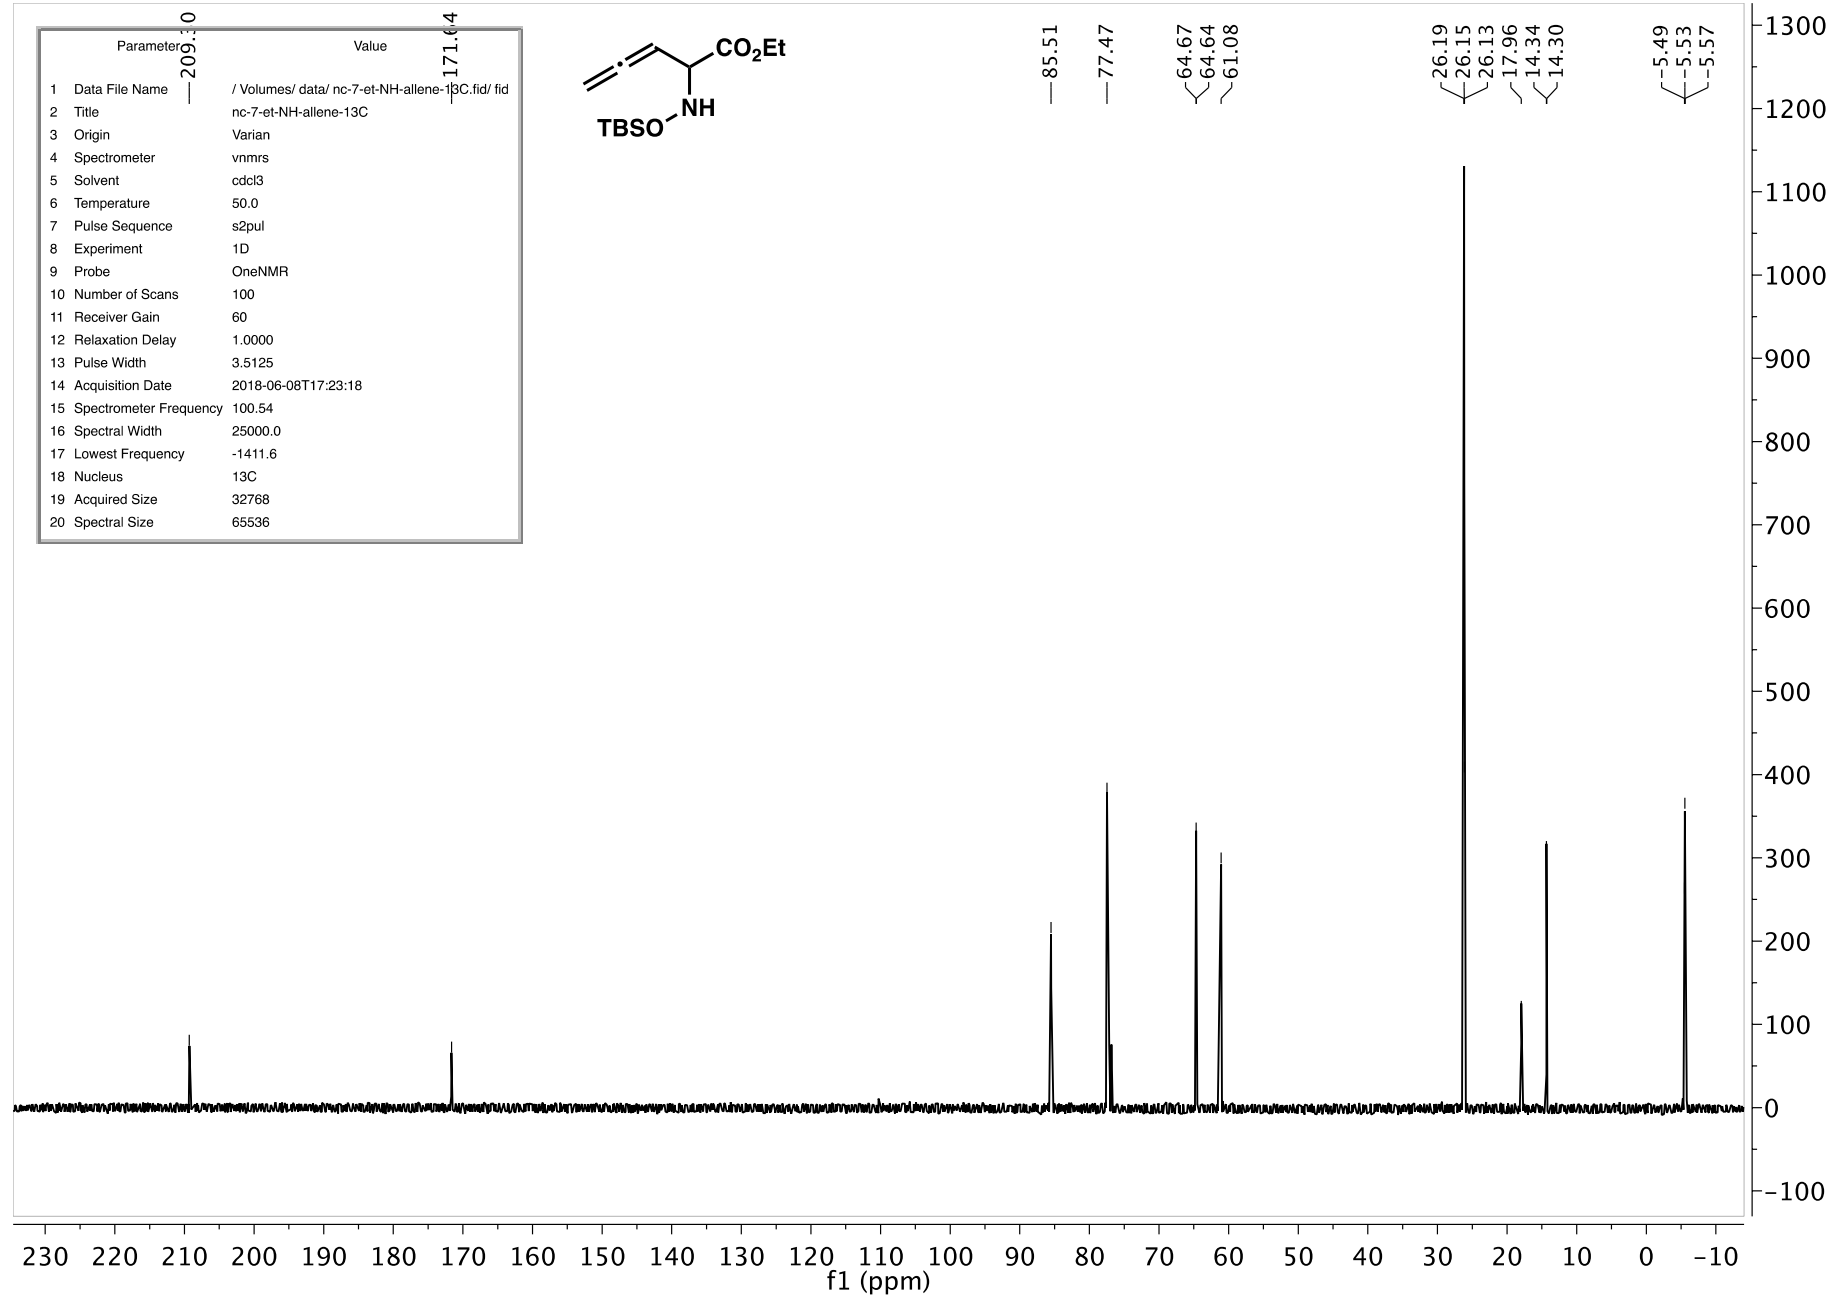

| Parameter                 | Value                                           |
|---------------------------|-------------------------------------------------|
| 1 Data File Name          | /Volumes/ data/ nc-7-et-NH-allene-HSQC.fid/ fid |
| 2 Title                   | nc-7-et-NH-allene-HSQC                          |
| 3 Origin                  | Varian                                          |
| 4 Spectrometer            | vnmrs                                           |
| 5 Solvent                 | edcl3                                           |
| 6 Temperature             | 50.0                                            |
| 7 Pulse Sequence          | HSQCAD                                          |
| 8 Experiment              | HSQC-EDITED                                     |
| 9 Probe                   | OneNMR                                          |
| 10 Number of Scans        | 2                                               |
| 11 Receiver Gain          | 30                                              |
| 12 Relaxation Delay       | 1.0000                                          |
| 13 Pulse Width            | 8.3000                                          |
| 14 Acquisition Date       | 2018-06-08T17:35:56                             |
| 15 Spectrometer Frequency | (399.80, 100.54)                                |
| 16 Spectral Width         | (6410.3, 20105.6)                               |
| 17 Lowest Frequency       | (-738.4, -1005.2)                               |
| 18 Nucleus                | (1H, 13C)                                       |
| 19 Acquired Size          | (962, 96)                                       |
| 20 Spectral Size          | (1024, 1024)                                    |

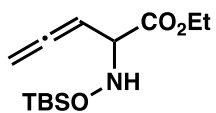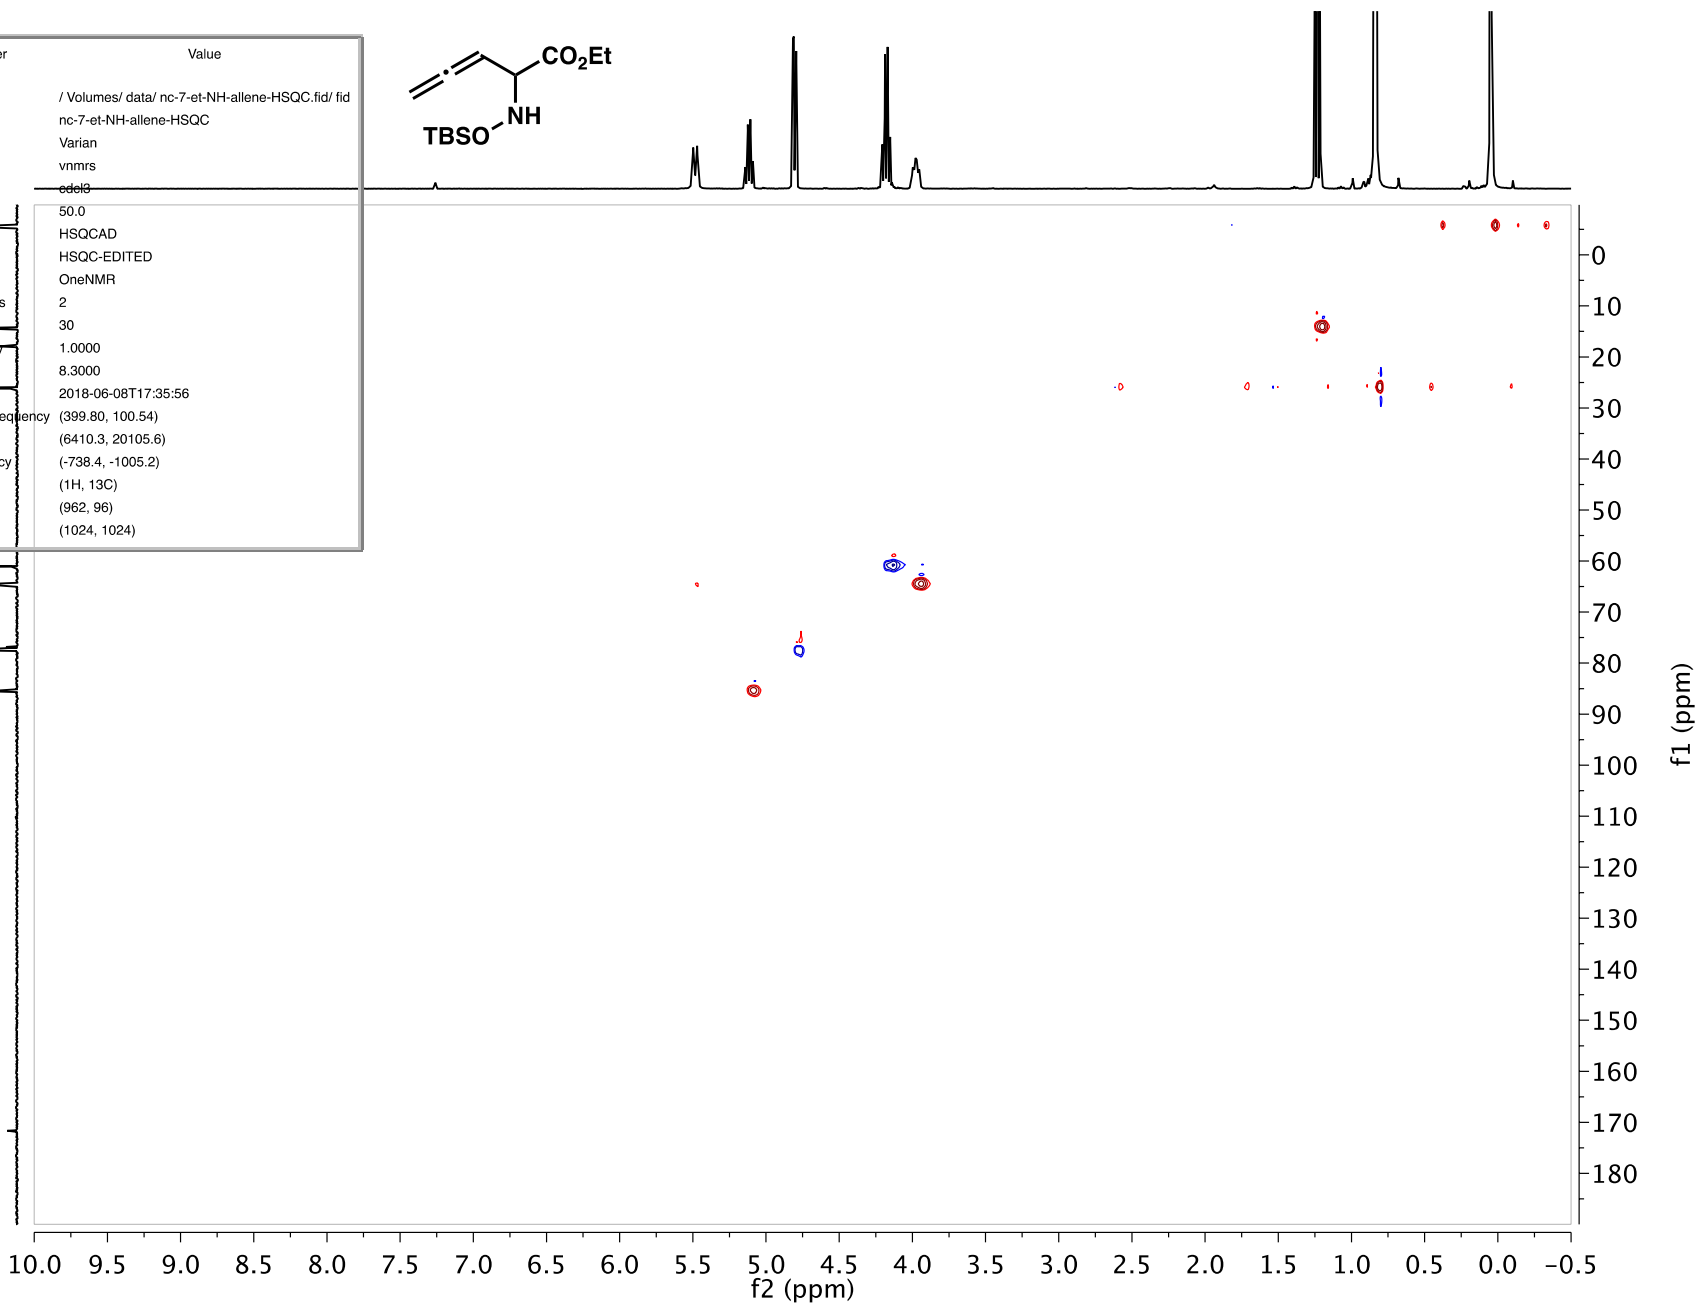

| Parameter                 | Value                                      |
|---------------------------|--------------------------------------------|
| 1 Data File Name          | /Volumes/nmr/nc-et-bz-alkyne-p/1/fid       |
| 2 Title                   | nc-et-bz-alkyne-p.1.fid                    |
| 3 Origin                  | Bruker BioSpin GmbH                        |
| 4 Solvent                 | CDCl3                                      |
| 5 Temperature             | 297.1                                      |
| 6 Pulse Sequence          | zg30                                       |
| 7 Probe                   | Z122623_0045 (CPP BBO 400S1 BB-H&F-D-05 Z) |
| 8 Number of Scans         | 16                                         |
| 9 Receiver Gain           | 64.2                                       |
| 10 Relaxation Delay       | 1.0000                                     |
| 11 Pulse Width            | 11.7000                                    |
| 12 Acquisition Time       | 4.0894                                     |
| 13 Acquisition Date       | 2018-06-08T08:28:33                        |
| 14 Spectrometer Frequency | 400.13                                     |
| 15 Spectral Width         | 8012.8                                     |
| 16 Lowest Frequency       | -1545.1                                    |
| 17 Nucleus                | 1H                                         |
| 18 Acquired Size          | 32768                                      |
| 19 Spectral Size          | 65536                                      |
| 20 Absolute Reference     |                                            |

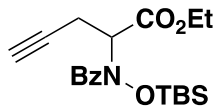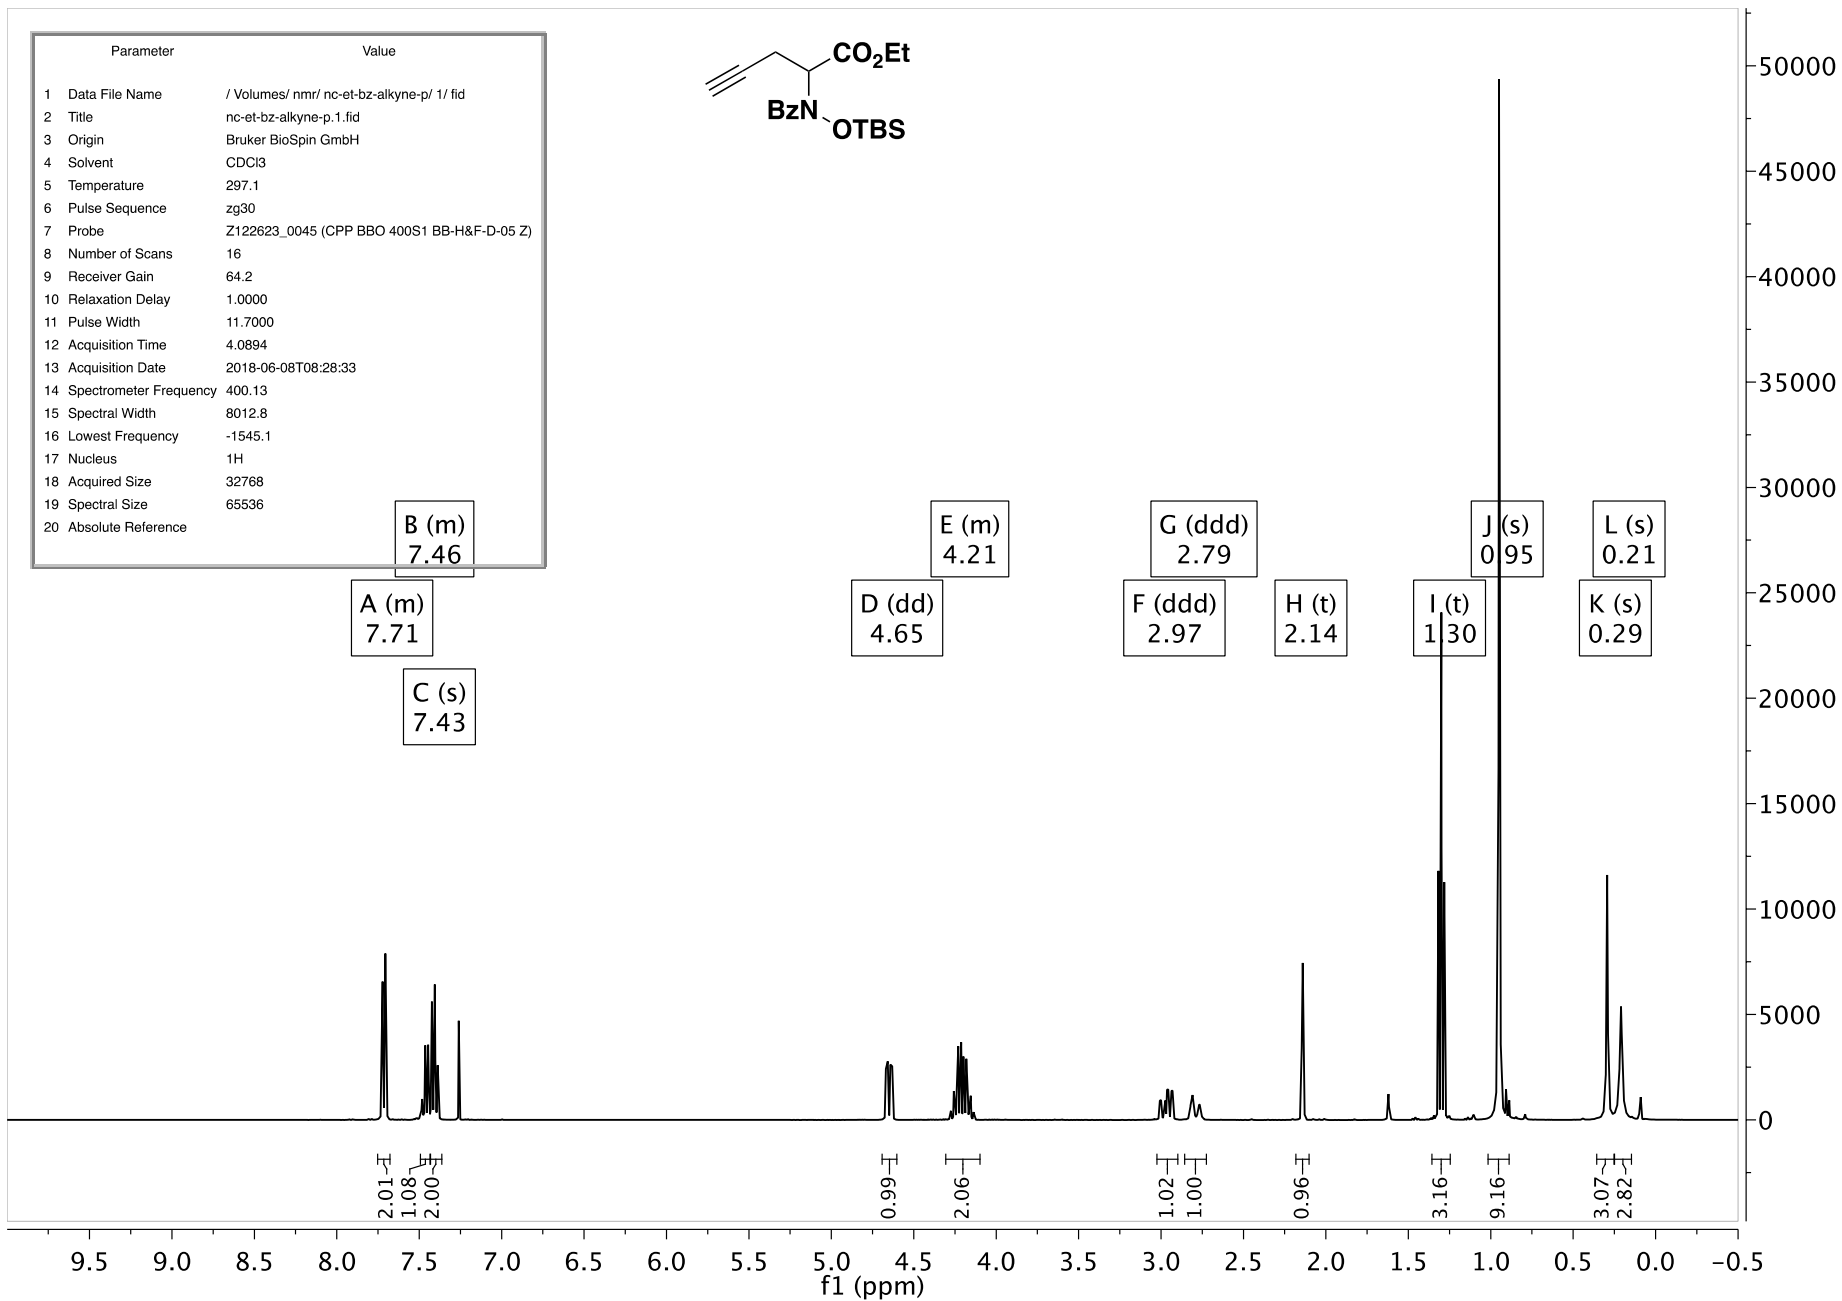

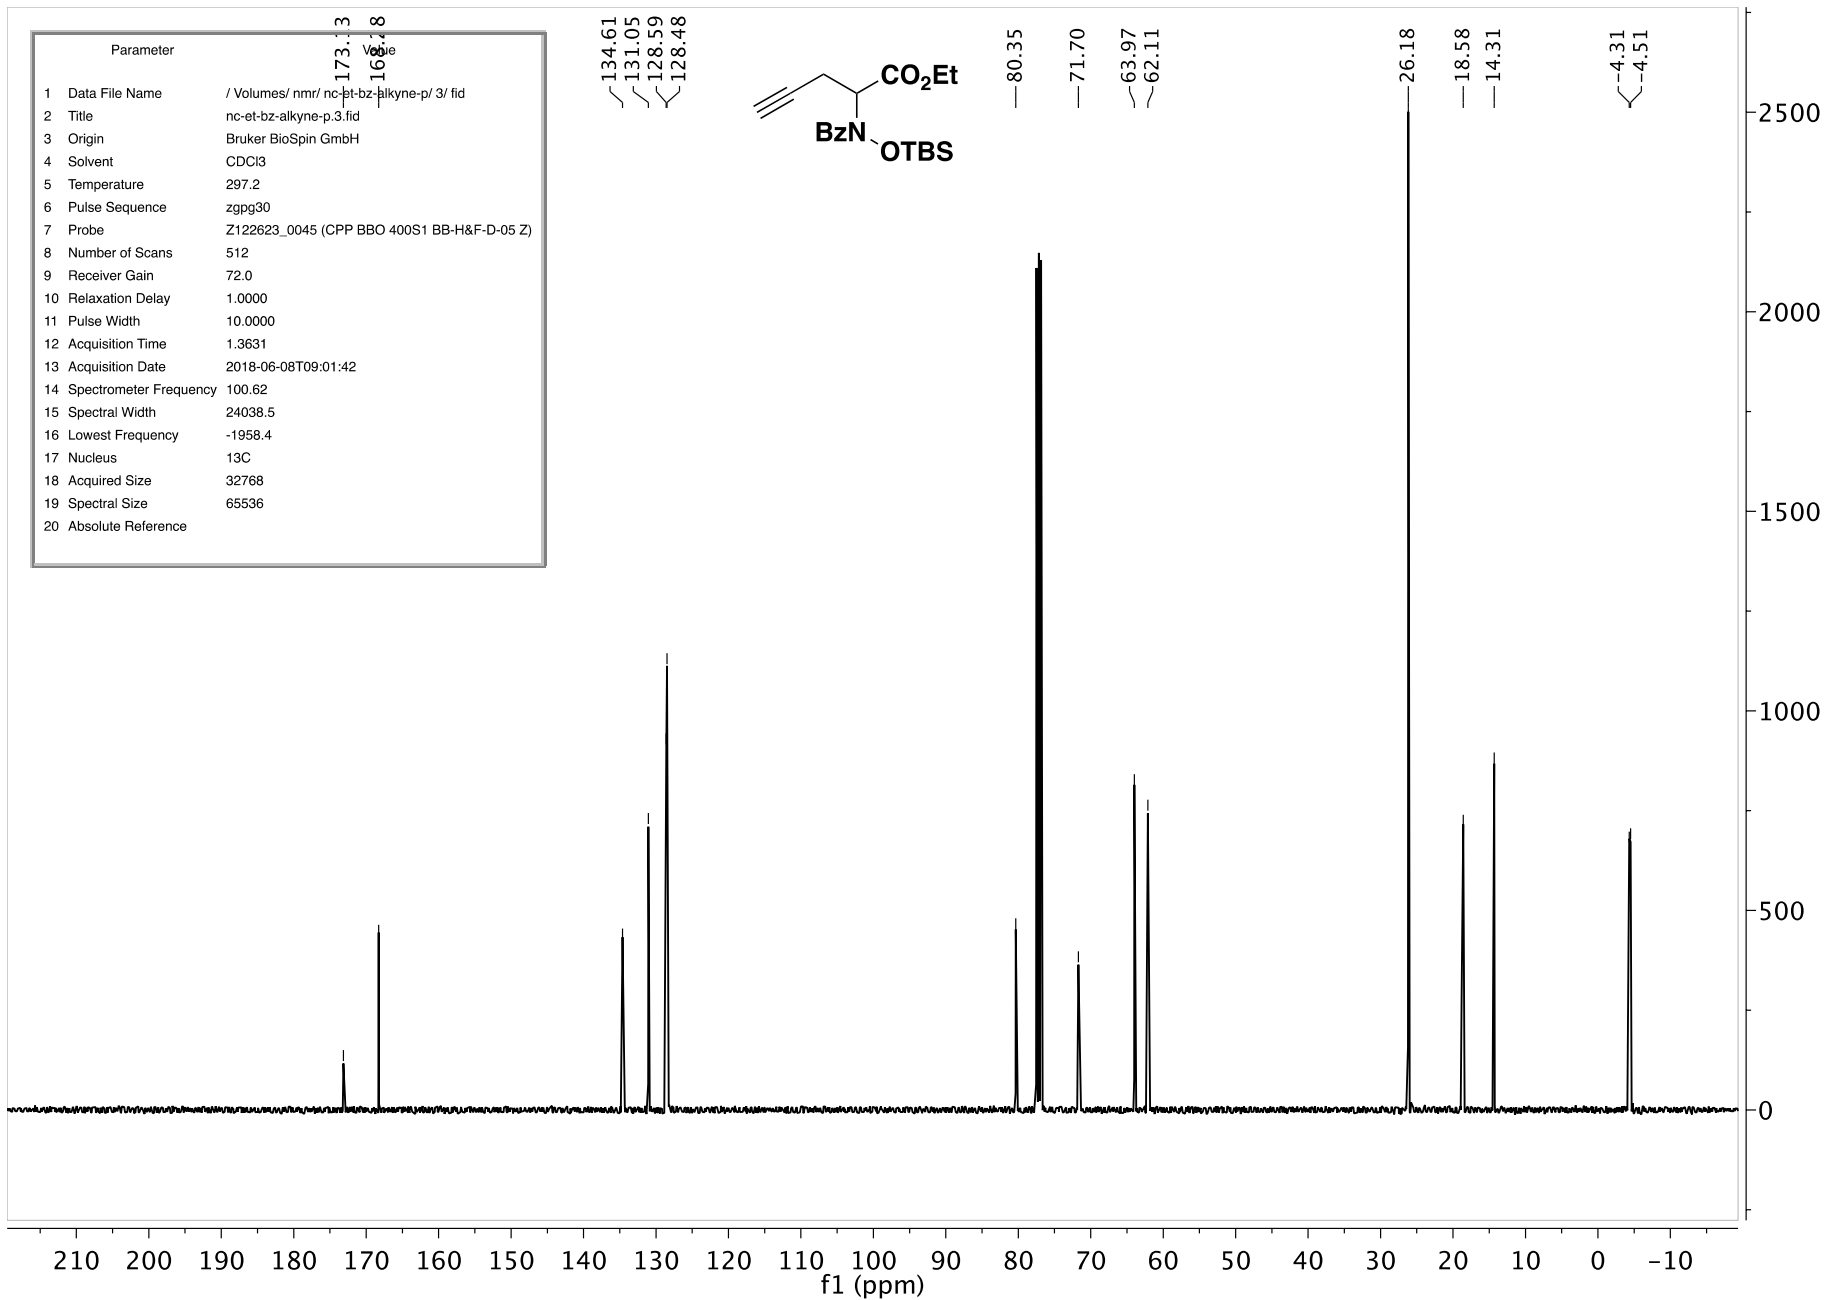

| Parameter                 | Value                                         |
|---------------------------|-----------------------------------------------|
| 1 Data File Name          | /Volumes/nmr/nc-4-011-Ac/1/fid                |
| 2 Title                   | nc-4-011-Ac.1.fid                             |
| 3 Origin                  | Bruker BioSpin GmbH                           |
| 4 Solvent                 | CDCl3                                         |
| 5 Temperature             | 295.0                                         |
| 6 Pulse Sequence          | zg30                                          |
| 7 Probe                   | 5 mm CPPBBO BB-1H/ 19F/ D Z-GRD Z122623/ 0045 |
| 8 Number of Scans         | 16                                            |
| 9 Receiver Gain           | 197.4                                         |
| 10 Relaxation Delay       | 1.0000                                        |
| 11 Pulse Width            | 11.7000                                       |
| 12 Acquisition Time       | 4.0894                                        |
| 13 Acquisition Date       | 2015-08-16T11:17:00                           |
| 14 Spectrometer Frequency | 400.13                                        |
| 15 Spectral Width         | 8012.8                                        |
| 16 Lowest Frequency       | -1545.4                                       |
| 17 Nucleus                | 1H                                            |
| 18 Acquired Size          | 32768                                         |
| 19 Spectral Size          | 65536                                         |

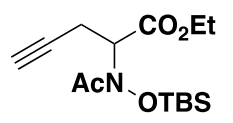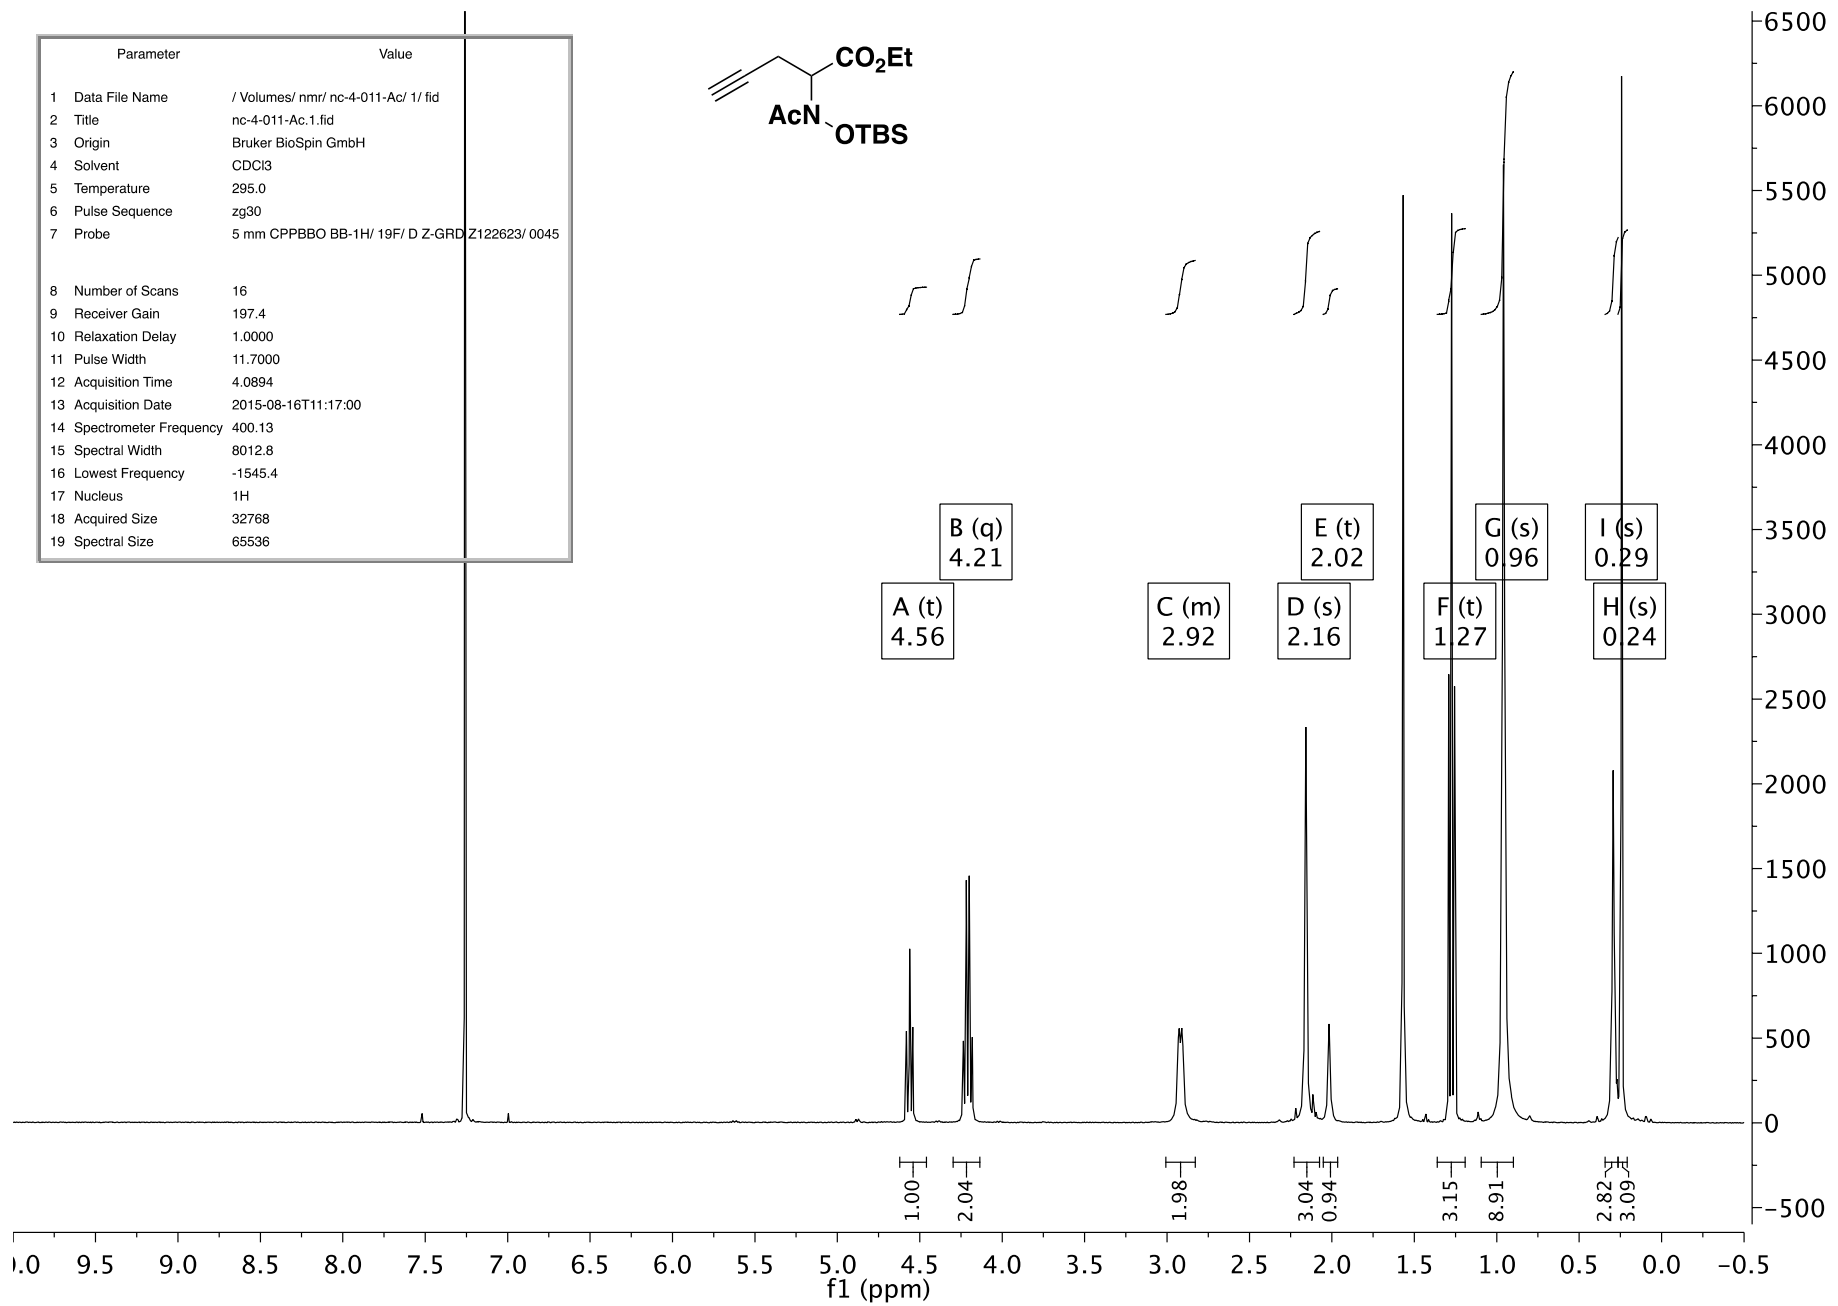



| Parameter                 |                                                           |
|---------------------------|-----------------------------------------------------------|
| 1 Data File Name          | /Volumes/ data-1/ nc-7-NAc-OTBS-alkyne/ CARBON01.fid/ fid |
| 2 Title                   | CARBON01                                                  |
| 3 Origin                  | Varian                                                    |
| 4 Spectrometer            | inova                                                     |
| 5 Solvent                 | cdcl3                                                     |
| 6 Temperature             | 25.0                                                      |
| 7 Pulse Sequence          | s2pul                                                     |
| 8 Experiment              | 1D                                                        |
| 9 Probe                   | autox7991                                                 |
| 10 Number of Scans        | 512                                                       |
| 11 Receiver Gain          | 30                                                        |
| 12 Relaxation Delay       | 1.0000                                                    |
| 13 Pulse Width            | 4.6125                                                    |
| 14 Acquisition Date       | 2018-06-20T23:39:25                                       |
| 15 Spectrometer Frequency | 125.65                                                    |
| 16 Spectral Width         | 31446.5                                                   |
| 17 Lowest Frequency       | -1903.7                                                   |
| 18 Nucleus                | <sup>13</sup> C                                           |
| 19 Acquired Size          | 32768                                                     |
| 20 Spectral Size          | 65536                                                     |

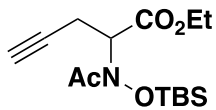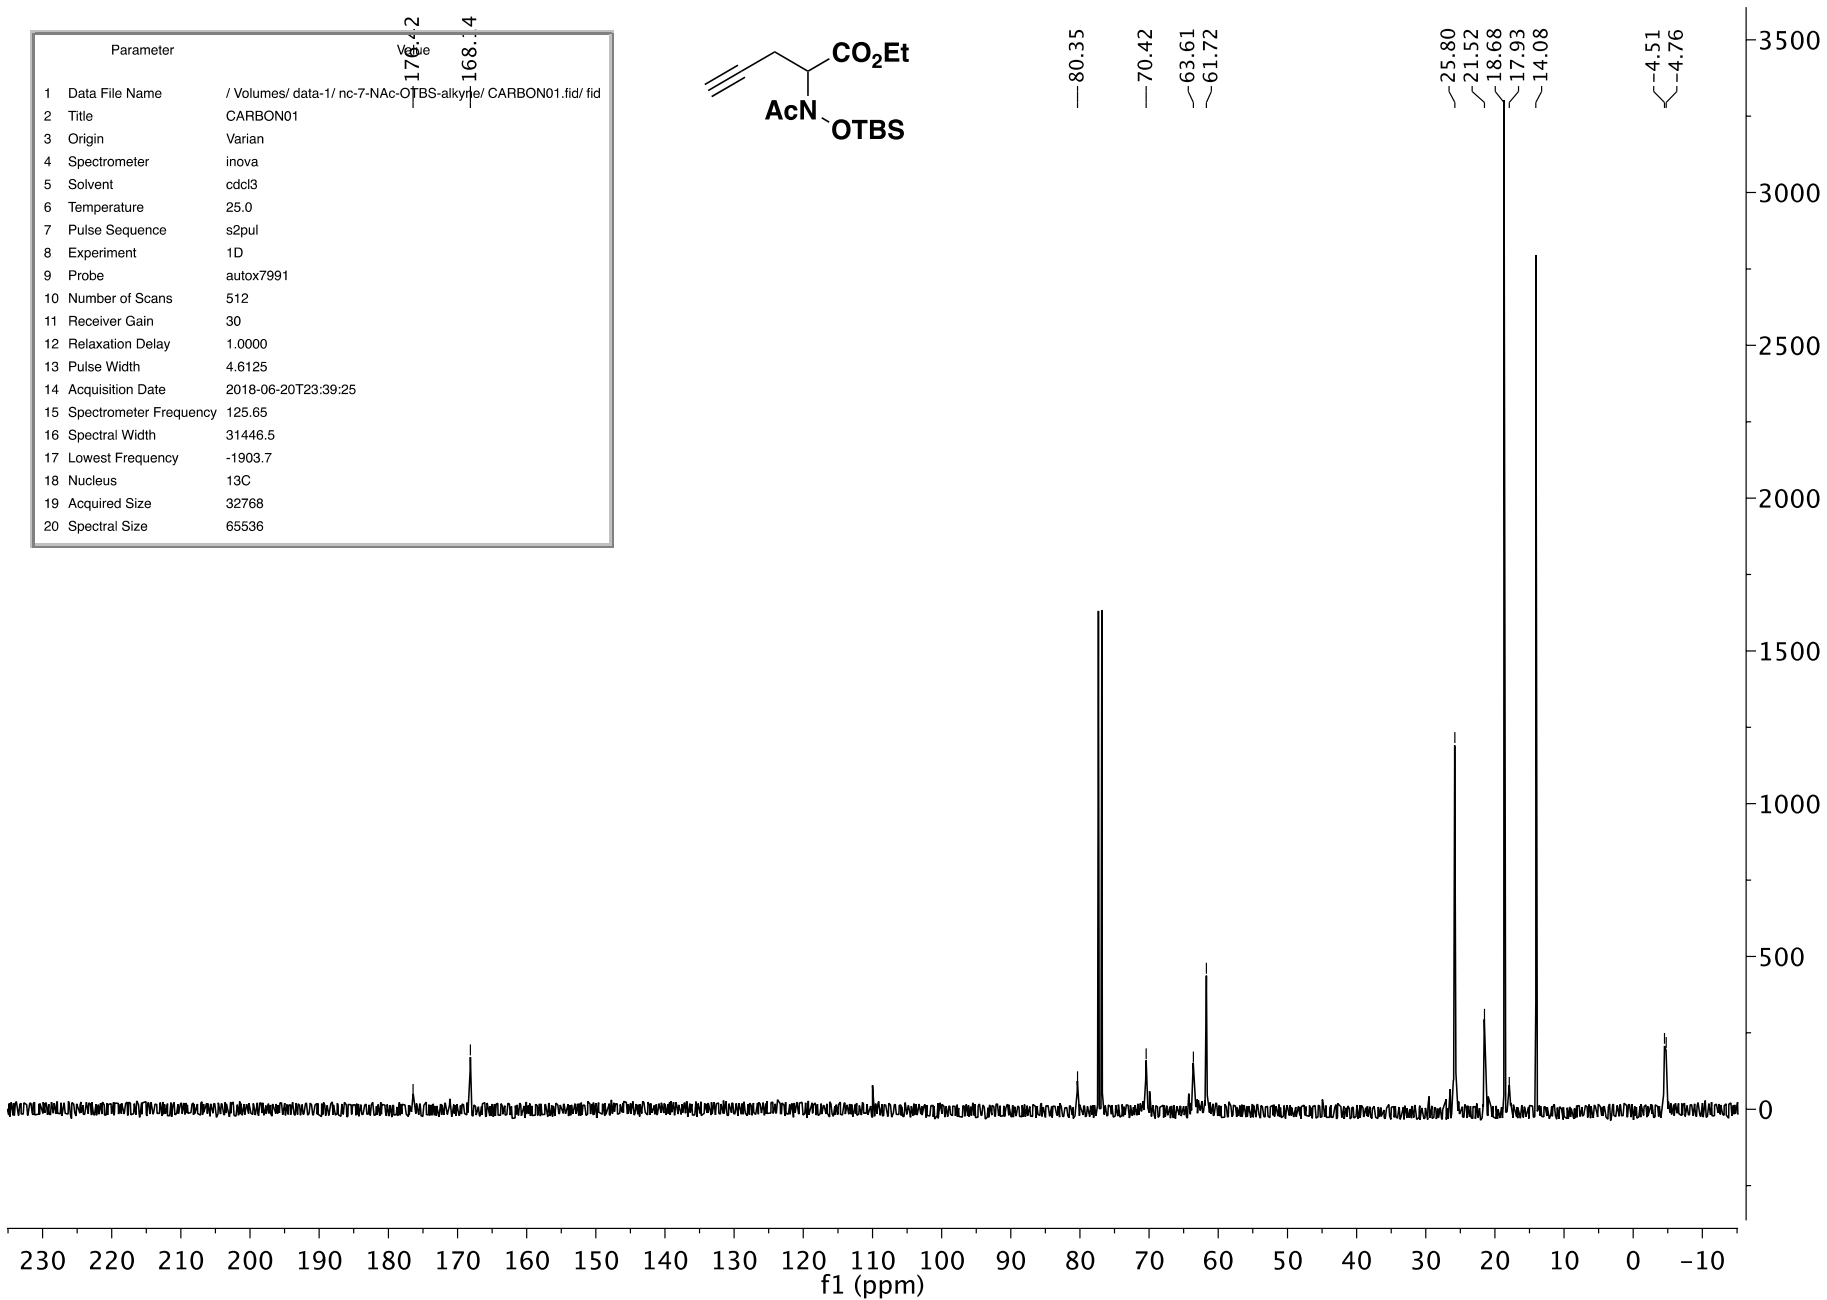

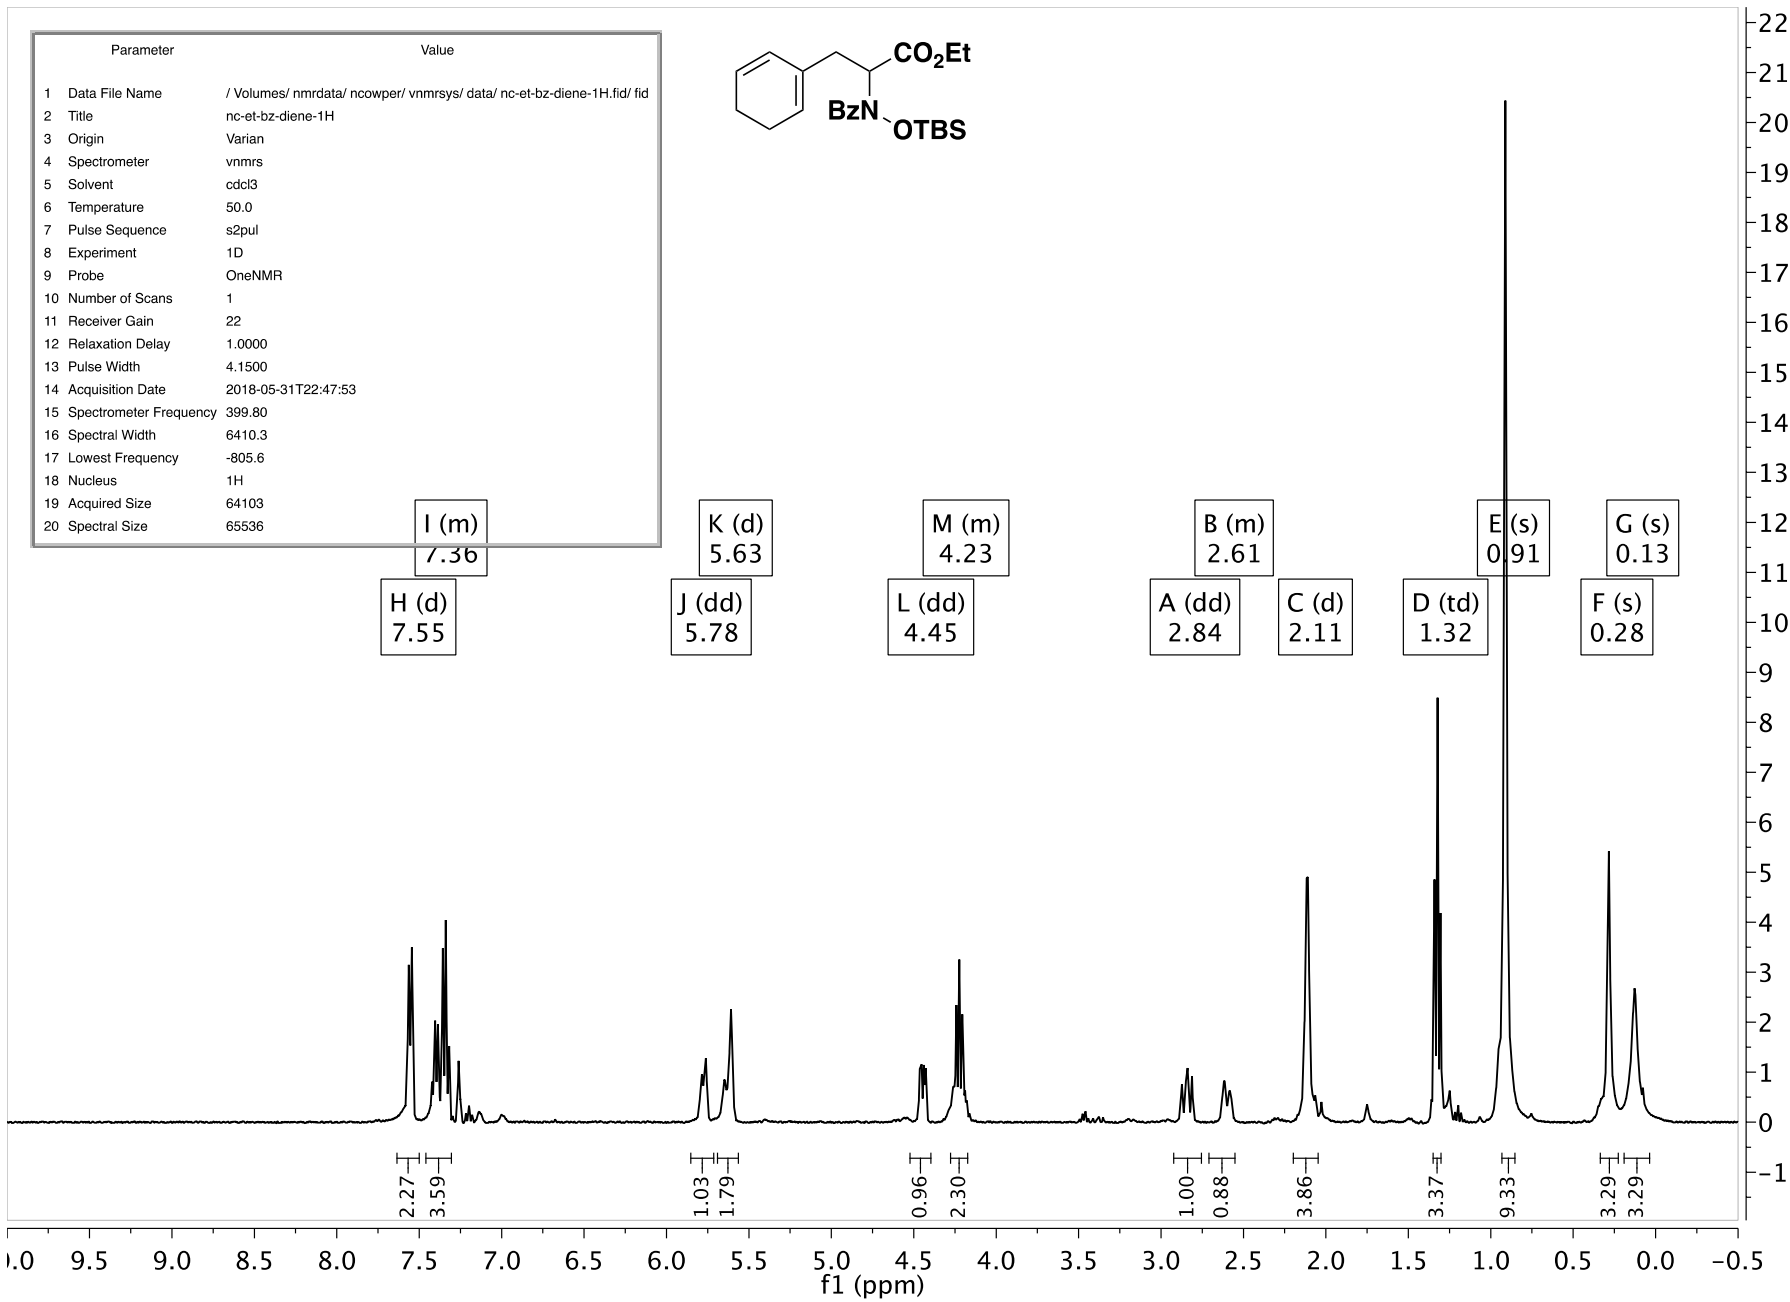

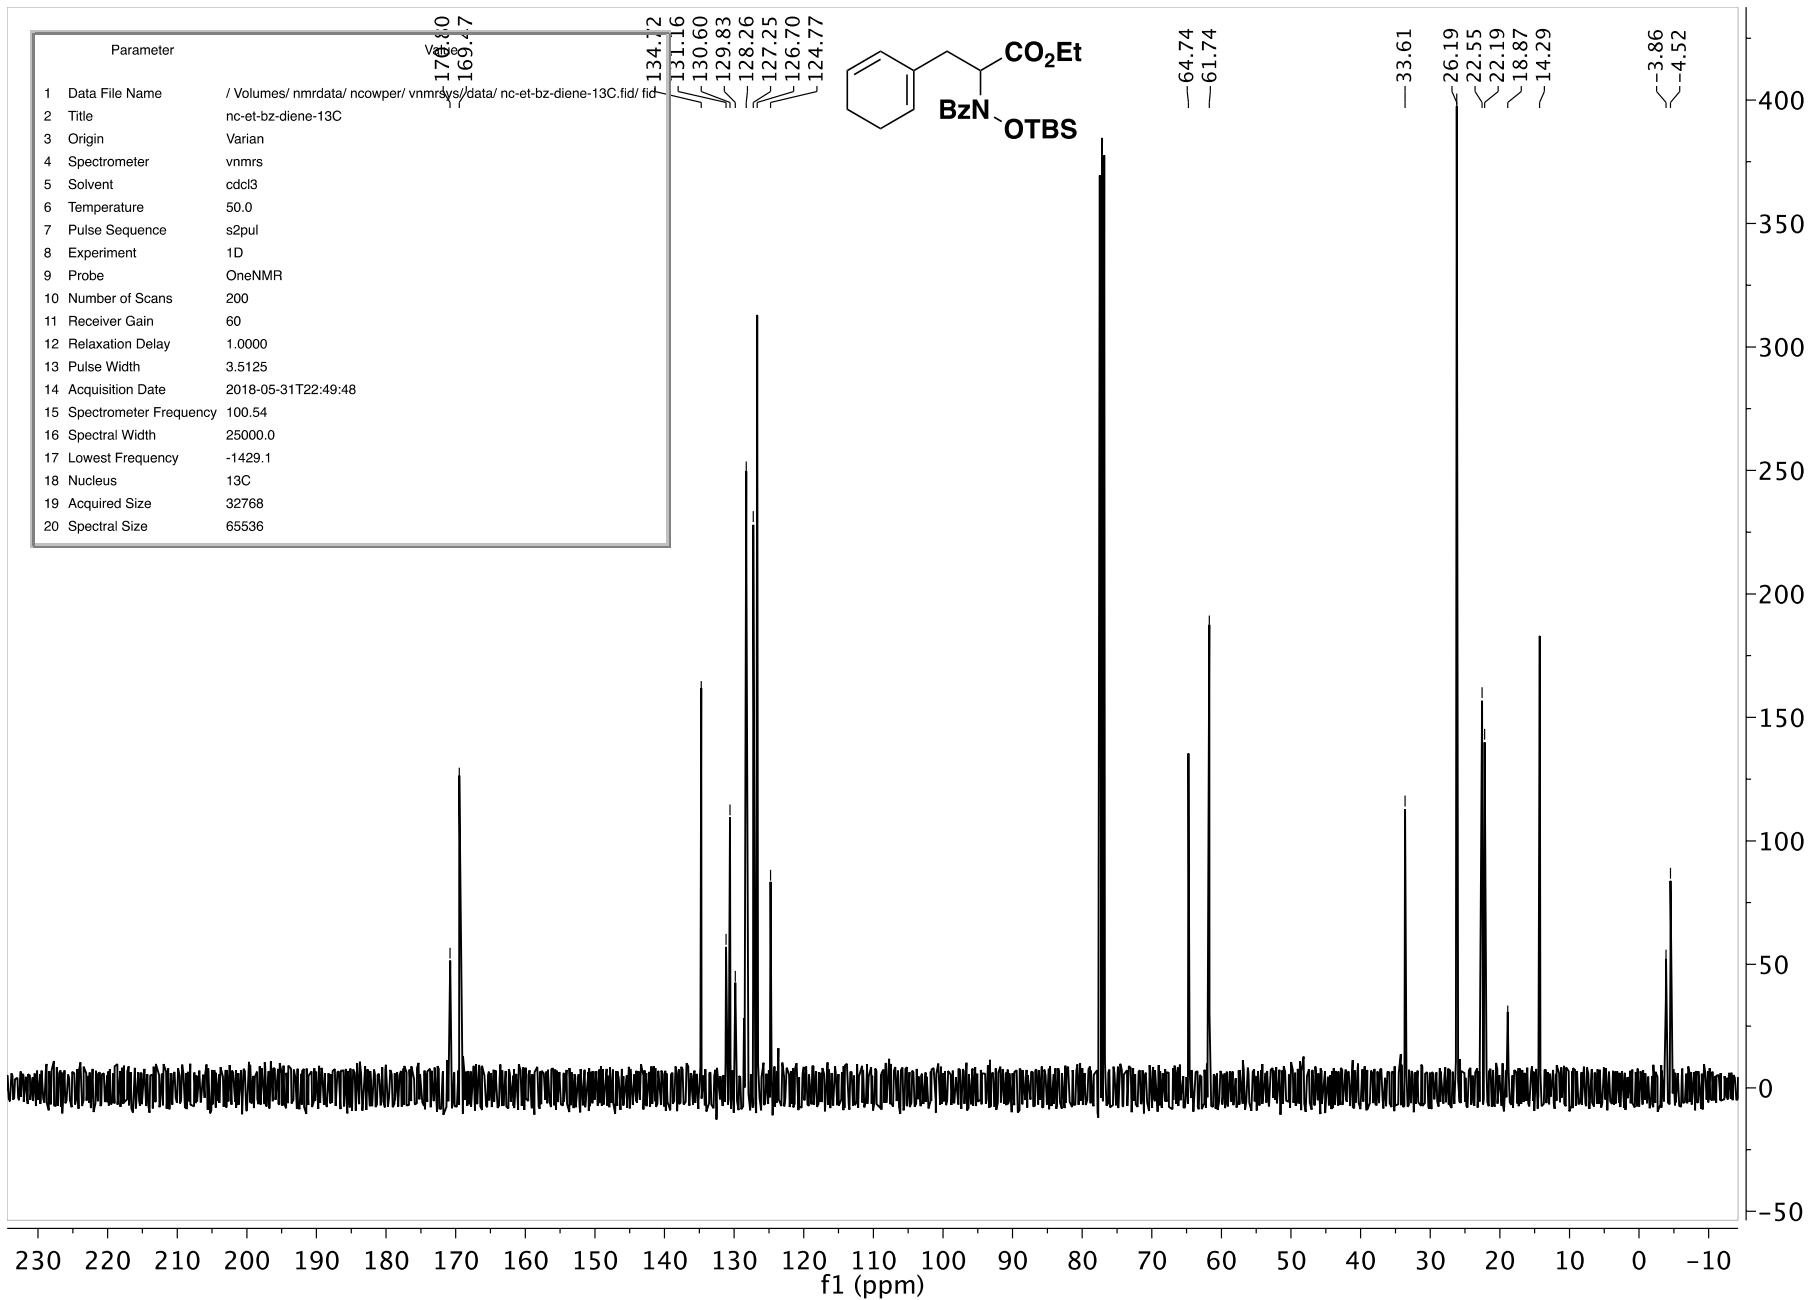

| Parameter                 | Value                                                   |
|---------------------------|---------------------------------------------------------|
| 1 Data File Name          | / Volumes/ data/ nc-7-Ac-Et-Diene-cl/ PROTON01.fid/ fid |
| 2 Title                   | PROTON01                                                |
| 3 Origin                  | Varian                                                  |
| 4 Spectrometer            | inova                                                   |
| 5 Solvent                 | cdcl3                                                   |
| 6 Temperature             | 25.0                                                    |
| 7 Pulse Sequence          | s2pul                                                   |
| 8 Experiment              | 1D                                                      |
| 9 Probe                   | autox7991                                               |
| 10 Number of Scans        | 8                                                       |
| 11 Receiver Gain          | 32                                                      |
| 12 Relaxation Delay       | 1.0000                                                  |
| 13 Pulse Width            | 5.8000                                                  |
| 14 Acquisition Date       | 2018-06-30T20:17:52                                     |
| 15 Spectrometer Frequency | 499.64                                                  |
| 16 Spectral Width         | 8000.0                                                  |
| 17 Lowest Frequency       | -1029.7                                                 |
| 18 Nucleus                | <sup>1</sup> H                                          |
| 19 Acquired Size          | 24000                                                   |
| 20 Spectral Size          | 65536                                                   |

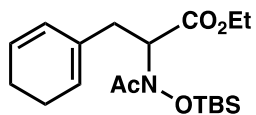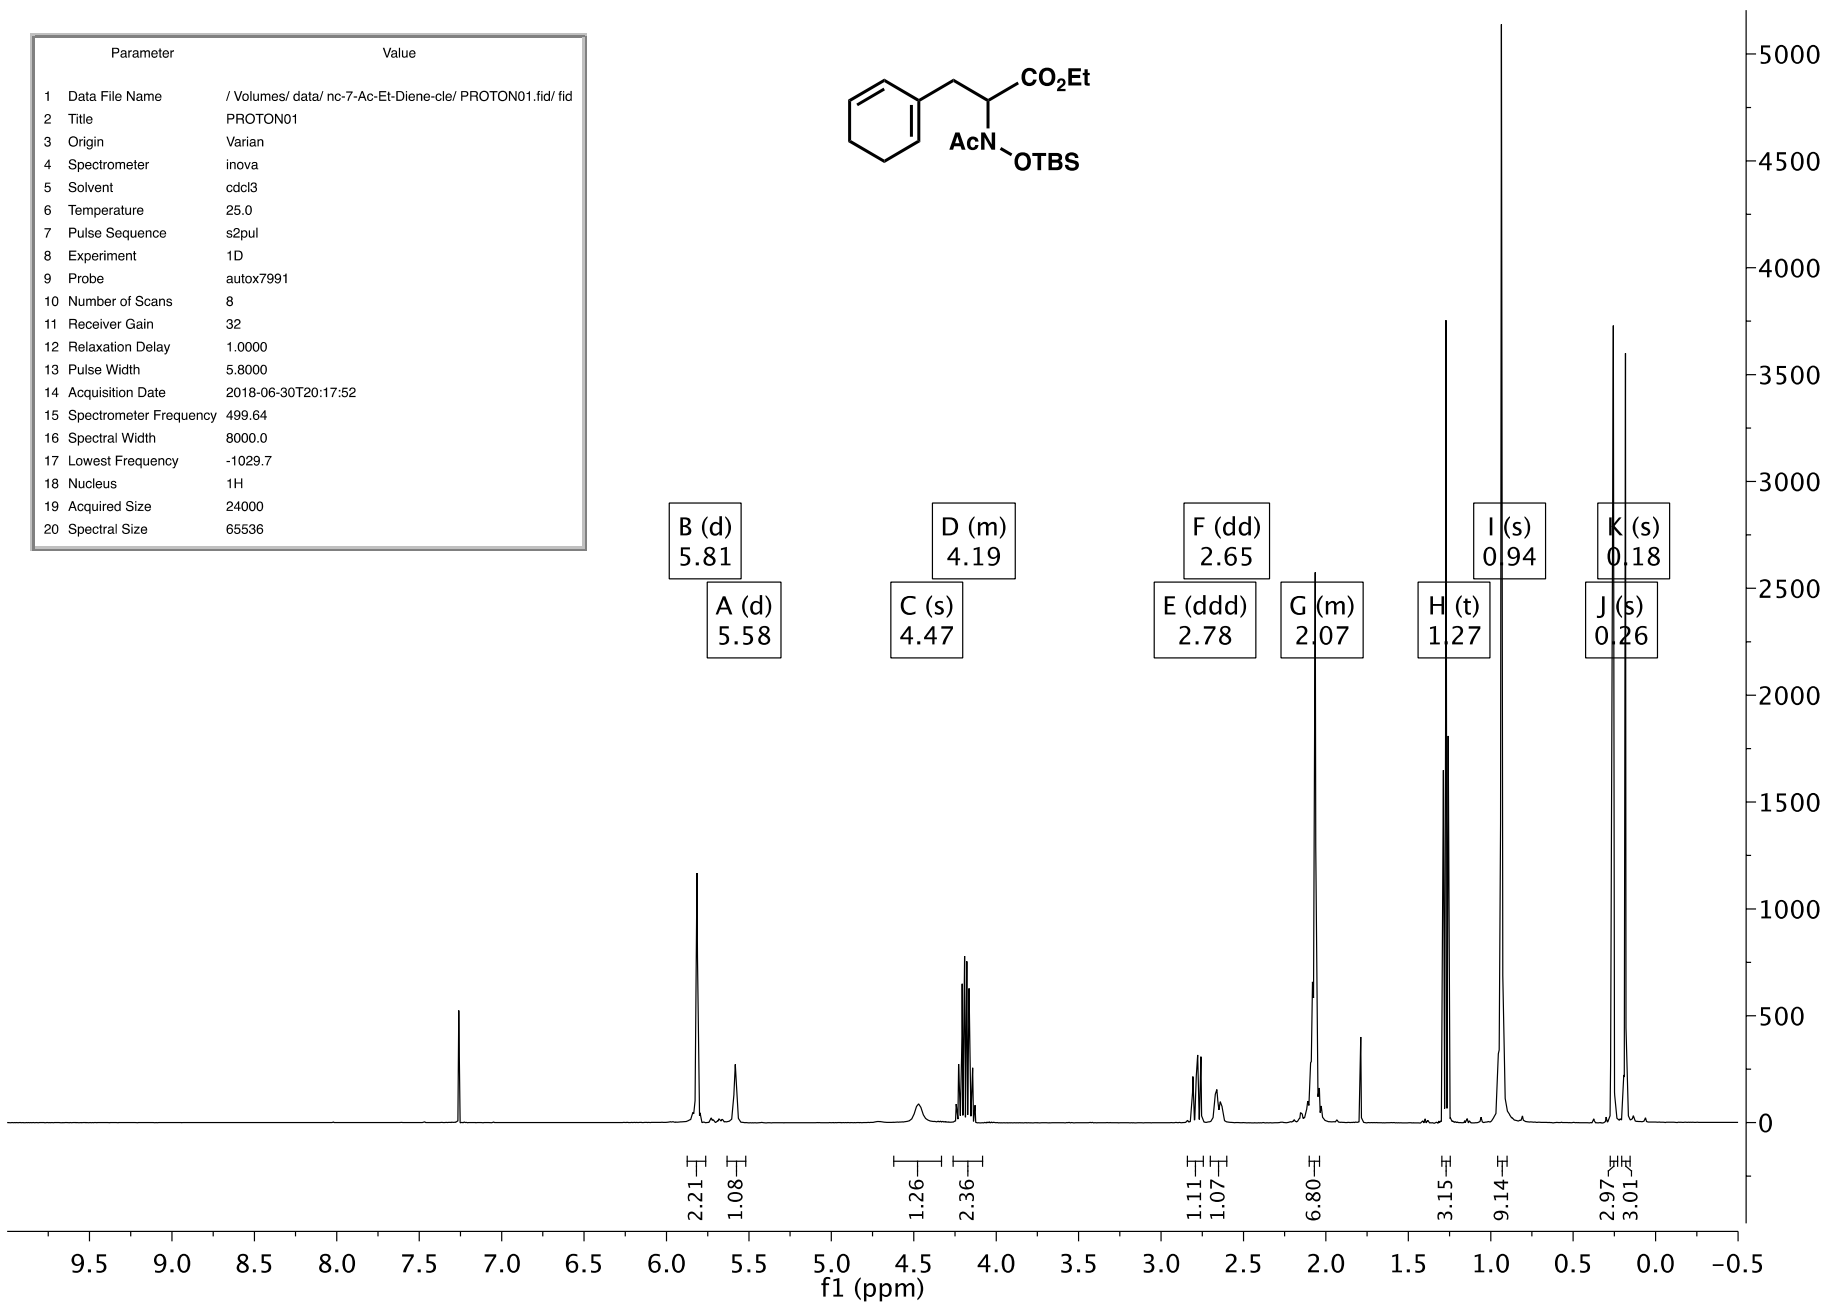

| Parameter                 | Value                                               |
|---------------------------|-----------------------------------------------------|
| 1 Data File Name          | /Volumes/nmrdata/nowper/nmr/nc-7-Ac-Et-Diene/3/ fid |
| 2 Title                   | nc-7-Ac-Et-Diené.3.fid                              |
| 3 Origin                  | Bruker BioSpin GmbH                                 |
| 4 Solvent                 | CDCl3                                               |
| 5 Temperature             | 295.2                                               |
| 6 Pulse Sequence          | zgpg30                                              |
| 7 Probe                   | Z122623_0045 (CPP BBO 400S1 BB-H&F-D-05 Z)          |
| 8 Number of Scans         | 1500                                                |
| 9 Receiver Gain           | 64.2                                                |
| 10 Relaxation Delay       | 1.0000                                              |
| 11 Pulse Width            | 10.0000                                             |
| 12 Acquisition Time       | 1.3631                                              |
| 13 Acquisition Date       | 2018-07-01T06:41:38                                 |
| 14 Spectrometer Frequency | 100.62                                              |
| 15 Spectral Width         | 24038.5                                             |
| 16 Lowest Frequency       | -1948.2                                             |
| 17 Nucleus                | 13C                                                 |
| 18 Acquired Size          | 32768                                               |
| 19 Spectral Size          | 65536                                               |
| 20 Absolute Reference     |                                                     |

175.10  
169.64  
131.84  
127.11  
126.84  
123.88

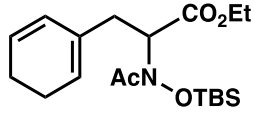

64.01  
61.53

33.64  
25.97  
22.52  
22.24  
21.62  
18.07  
14.22

-4.53

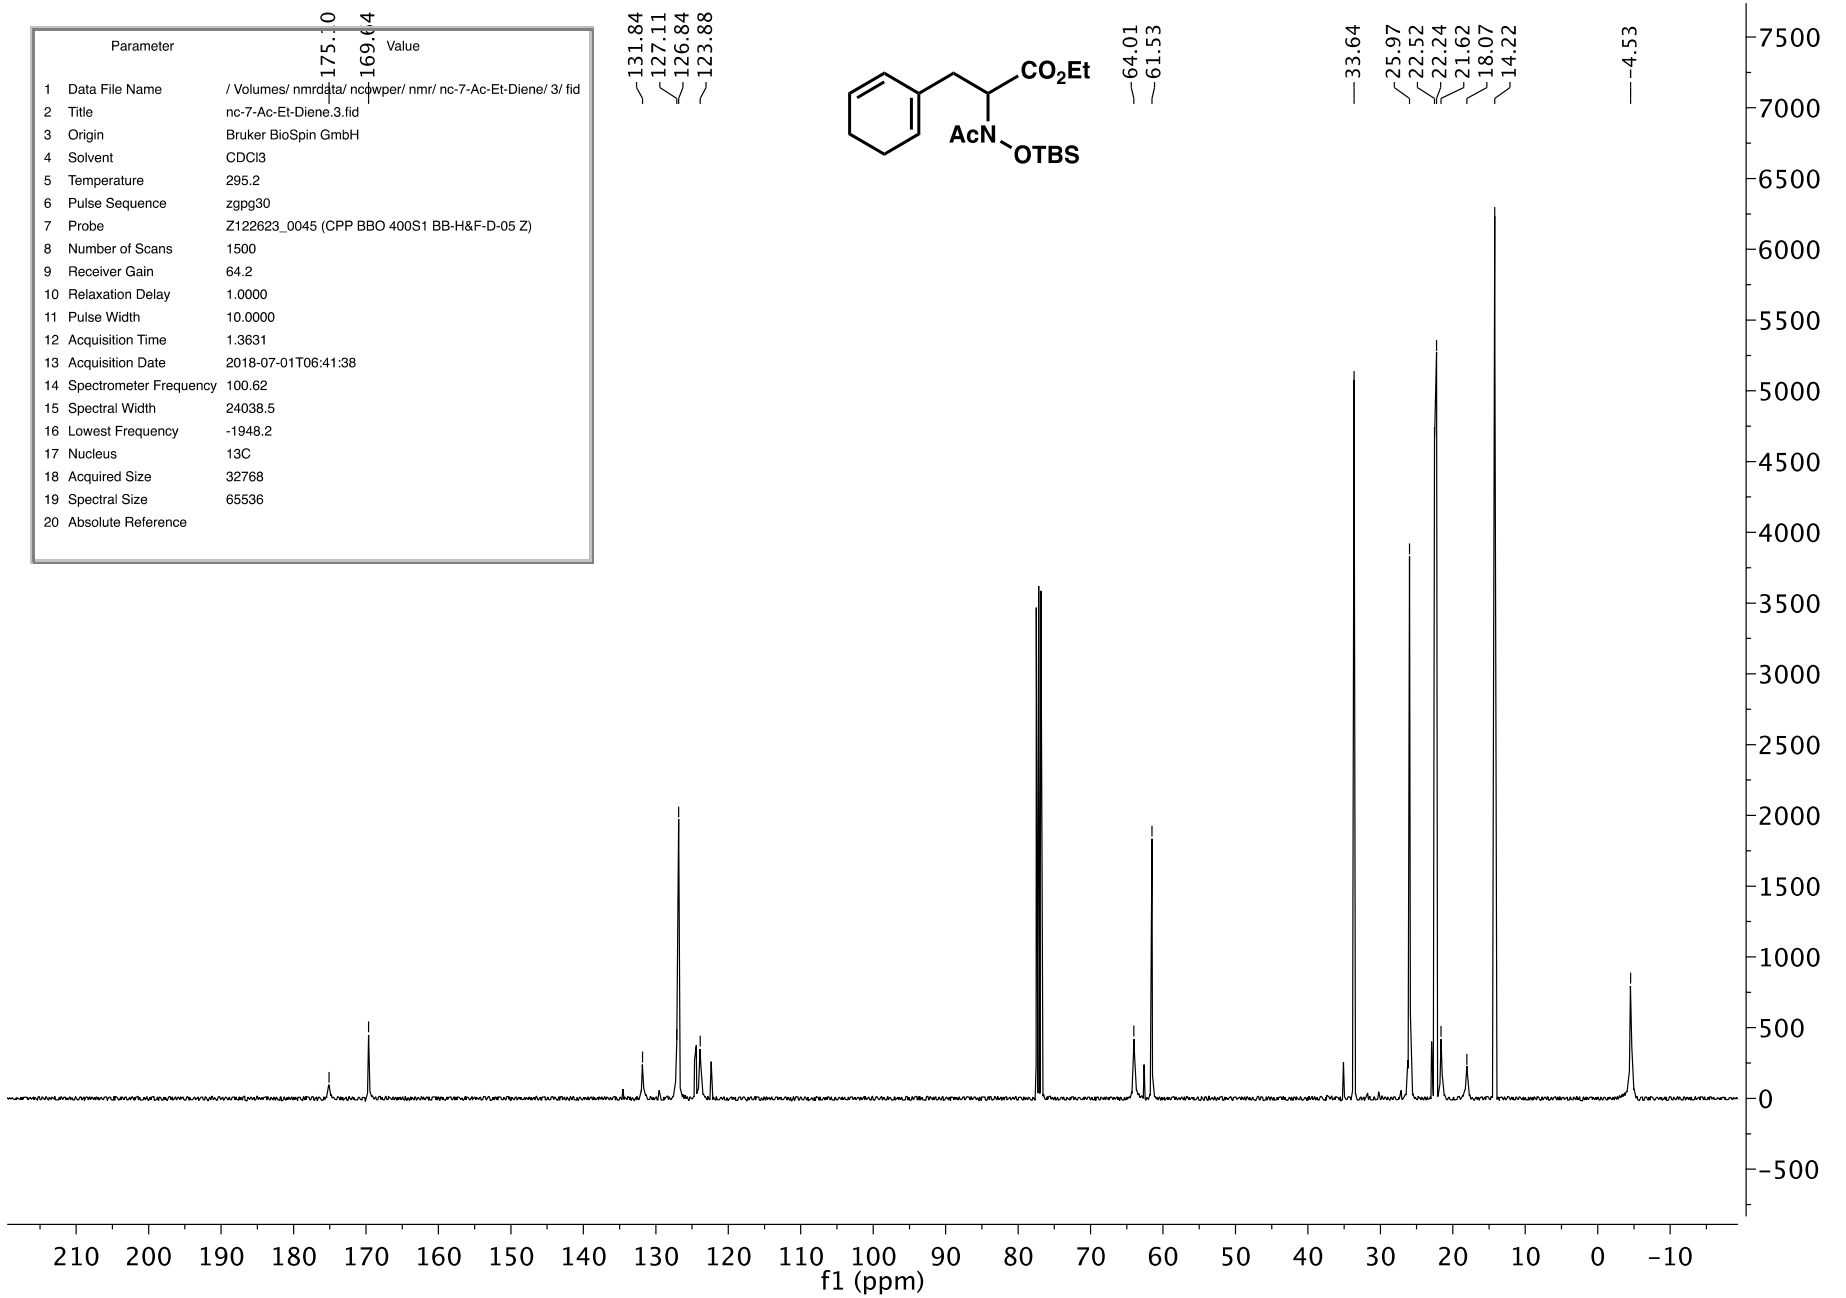

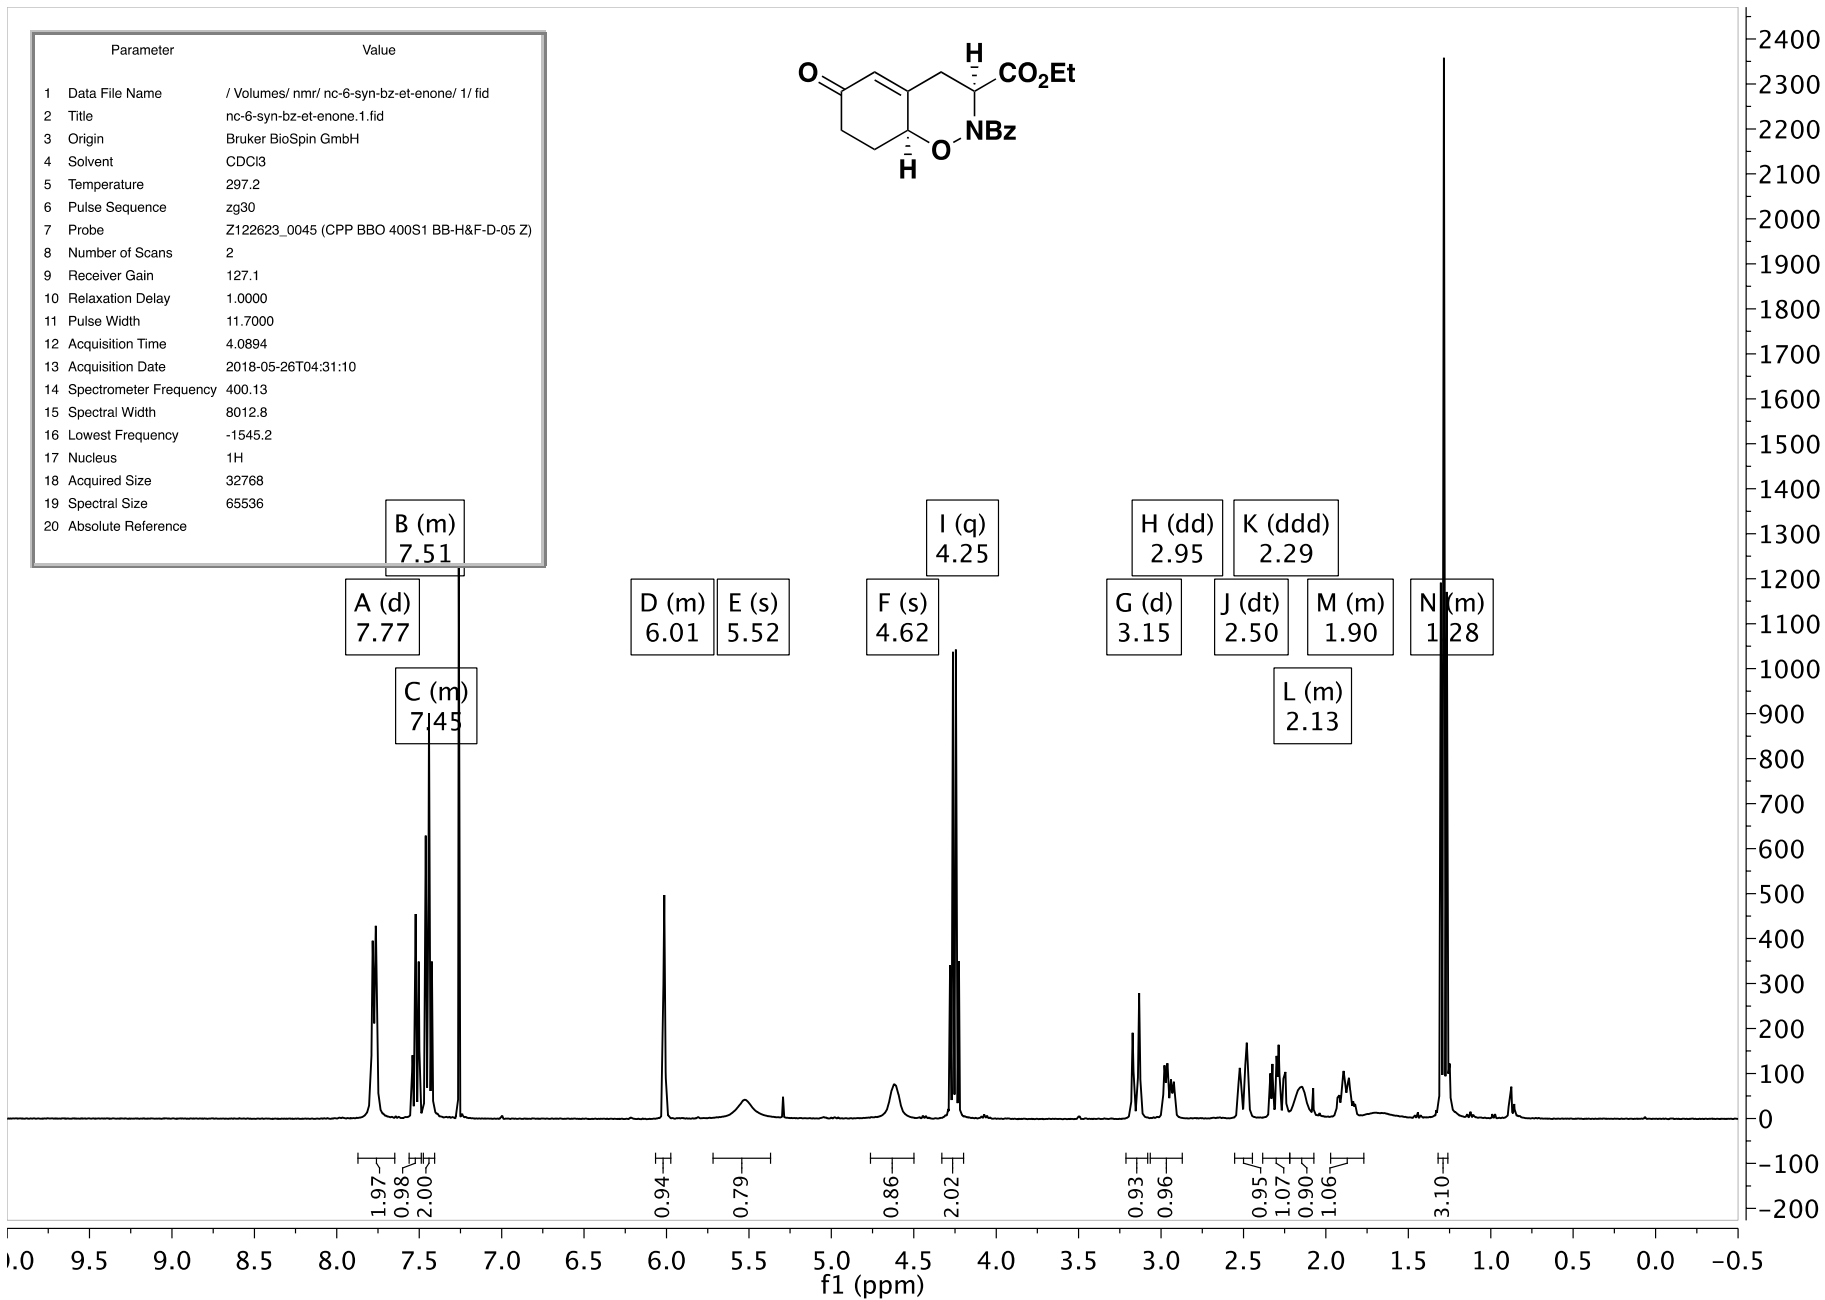

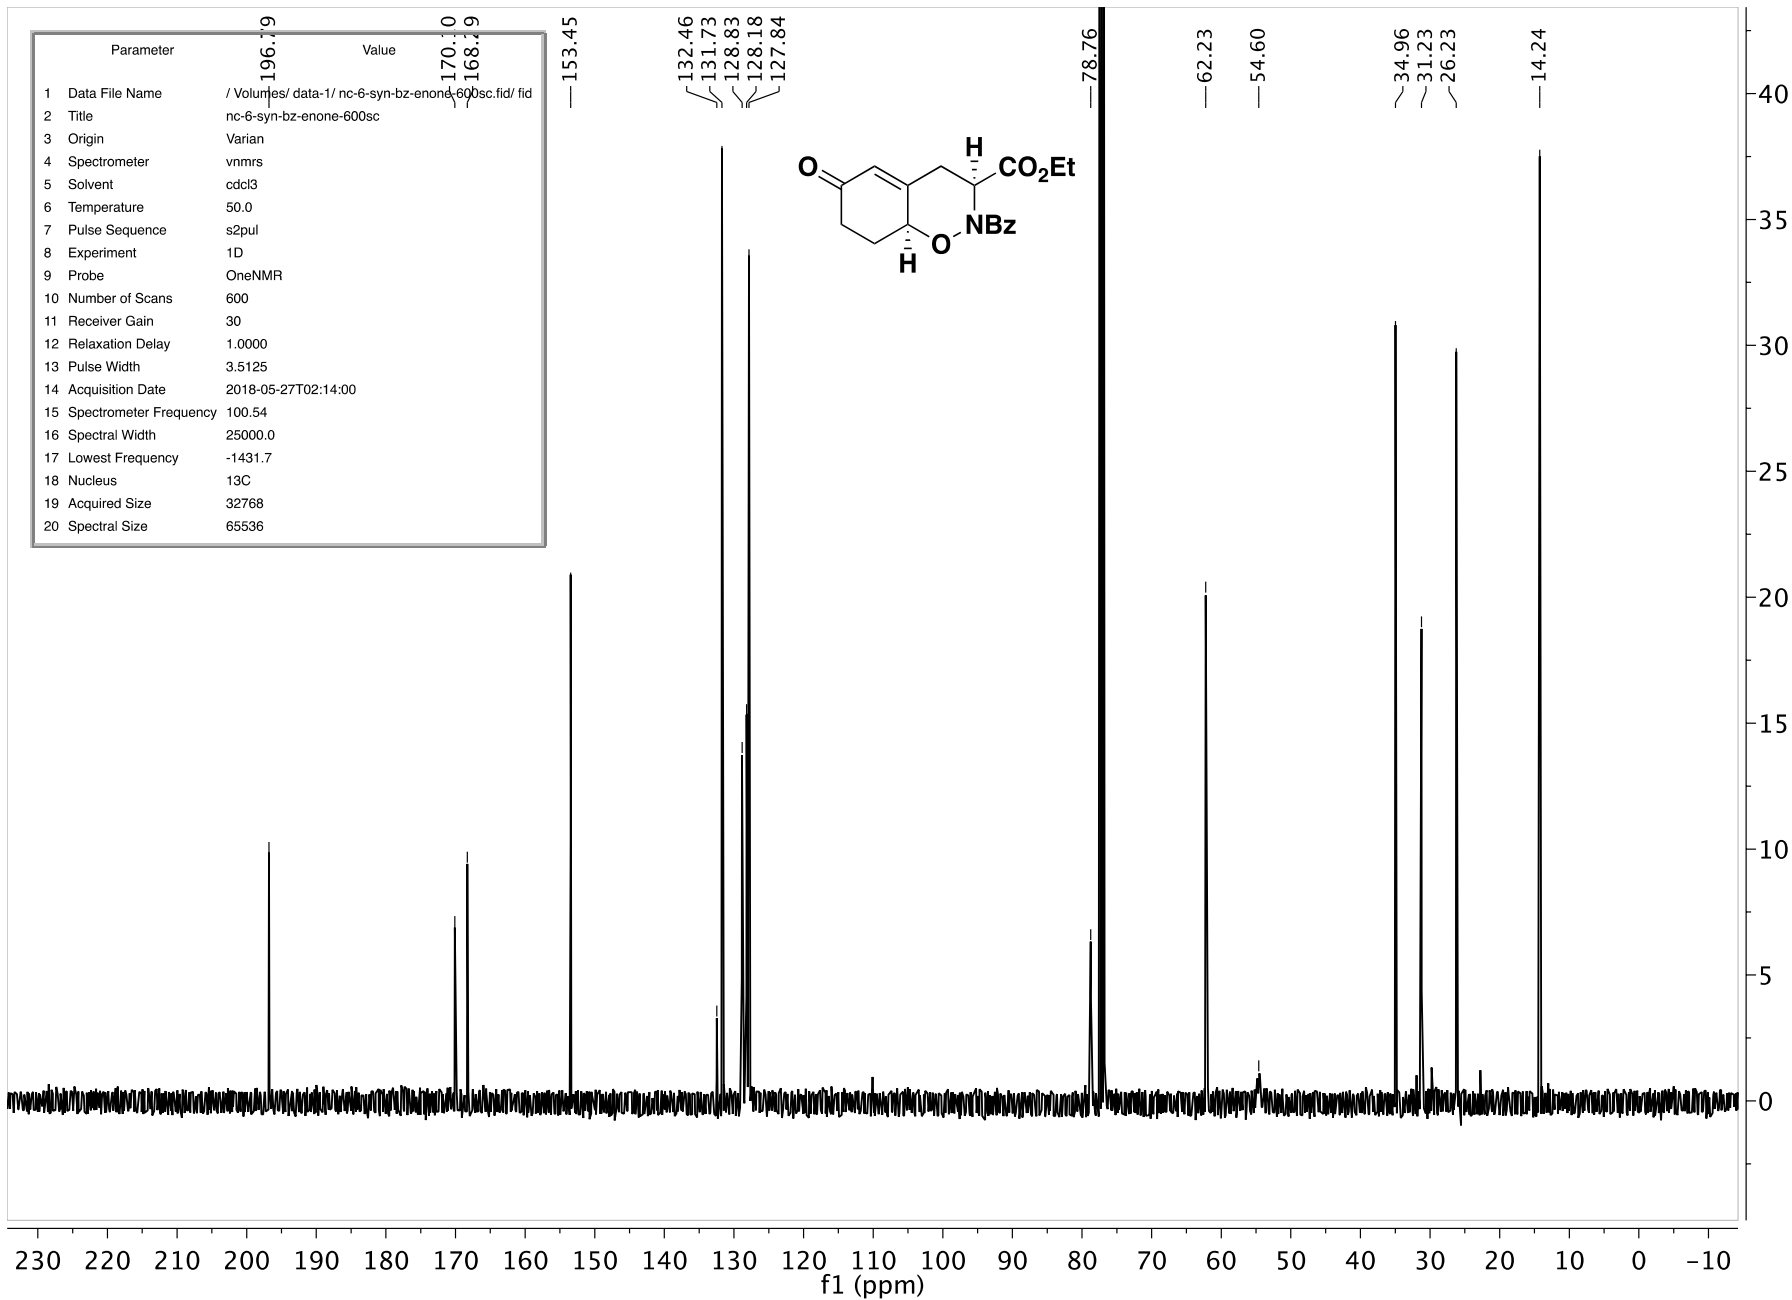

| Parameter                 | Value                                                      |
|---------------------------|------------------------------------------------------------|
| 1 Data File Name          | /Volumes/ data-2/ nc-6-anti-bz-et-enone/ PROTON01.fid/ fid |
| 2 Title                   | PROTON01                                                   |
| 3 Origin                  | Varian                                                     |
| 4 Spectrometer            | inova                                                      |
| 5 Solvent                 | cdcl3                                                      |
| 6 Temperature             | 25.0                                                       |
| 7 Pulse Sequence          | s2pul                                                      |
| 8 Experiment              | 1D                                                         |
| 9 Probe                   | autox7991                                                  |
| 10 Number of Scans        | 8                                                          |
| 11 Receiver Gain          | 34                                                         |
| 12 Relaxation Delay       | 1.0000                                                     |
| 13 Pulse Width            | 5.8000                                                     |
| 14 Acquisition Date       | 2018-05-26T07:59:23                                        |
| 15 Spectrometer Frequency | 499.64                                                     |
| 16 Spectral Width         | 8000.0                                                     |
| 17 Lowest Frequency       | -1015.2                                                    |
| 18 Nucleus                | <sup>1</sup> H                                             |
| 19 Acquired Size          | 24000                                                      |
| 20 Spectral Size          | 65536                                                      |

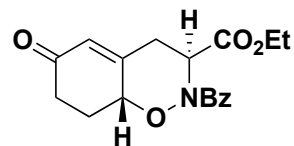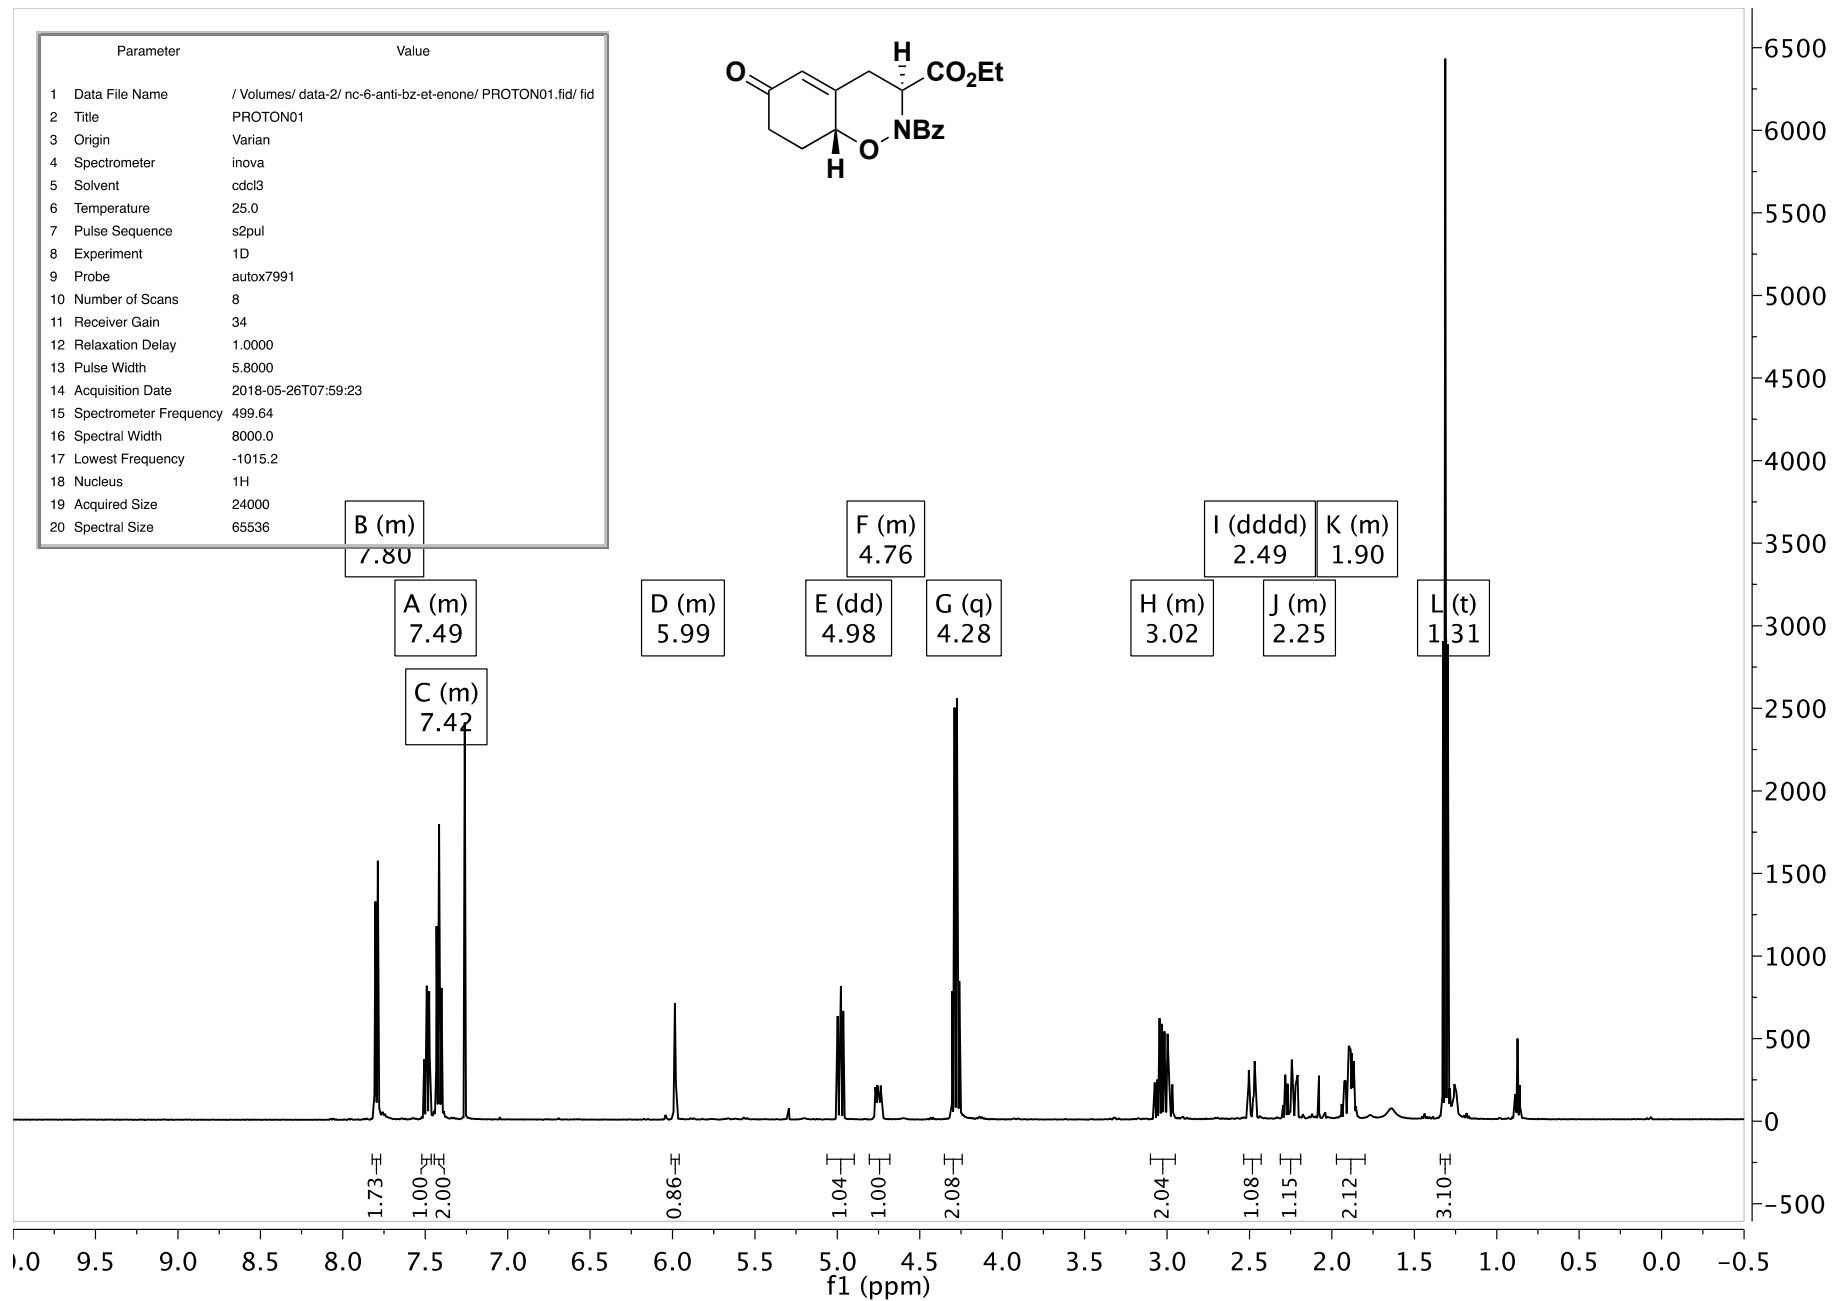



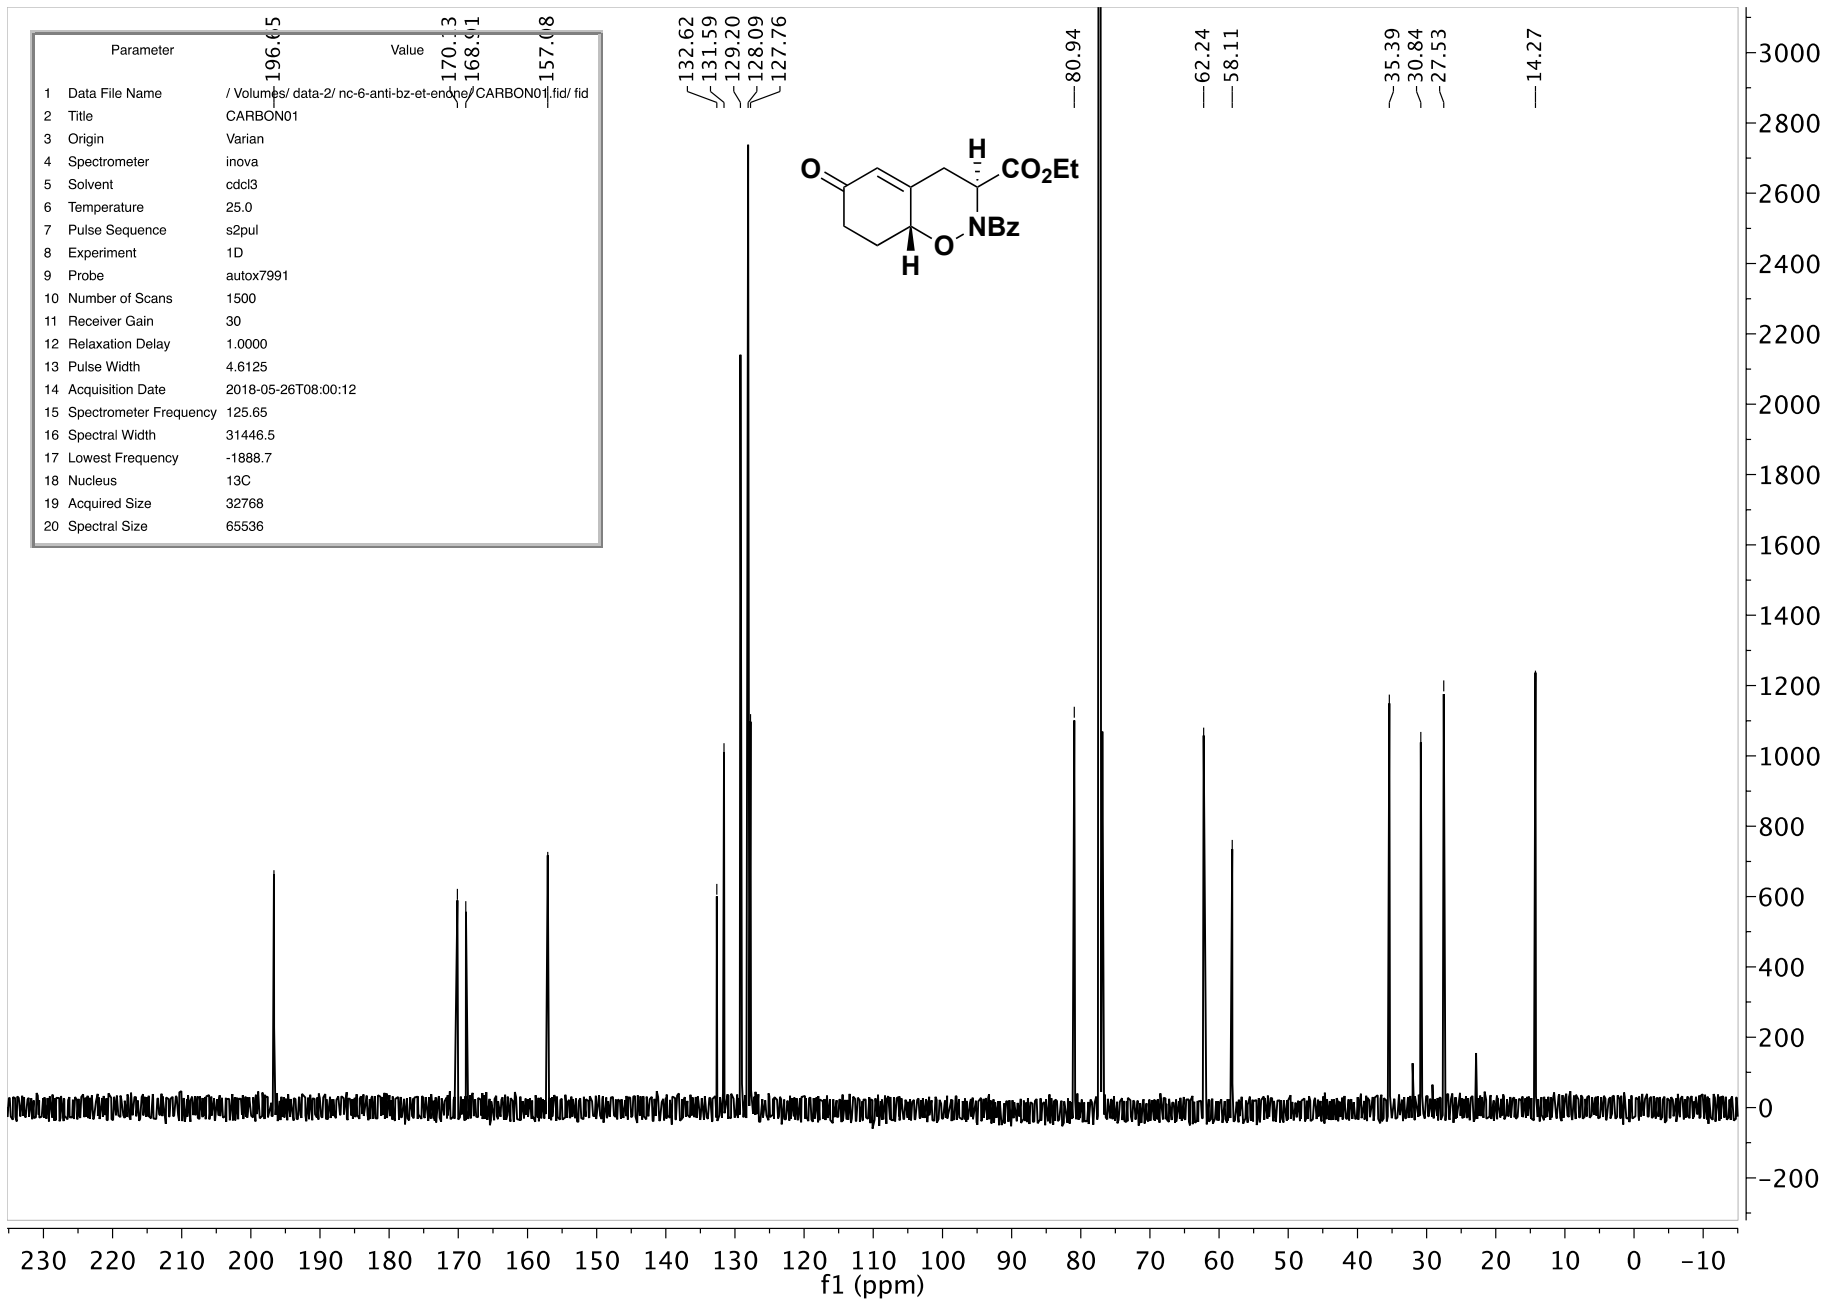



| Parameter                 | Value                                           |
|---------------------------|-------------------------------------------------|
| 1 Data File Name          | /Volumes/data-1/nc-7-ox-cyc-Ac/PROTON01.fid/fid |
| 2 Title                   | PROTON01                                        |
| 3 Origin                  | Varian                                          |
| 4 Spectrometer            | inova                                           |
| 5 Solvent                 | cdcl3                                           |
| 6 Temperature             | 25.0                                            |
| 7 Pulse Sequence          | s2pul                                           |
| 8 Experiment              | 1D                                              |
| 9 Probe                   | autox7991                                       |
| 10 Number of Scans        | 8                                               |
| 11 Receiver Gain          | 30                                              |
| 12 Relaxation Delay       | 1.0000                                          |
| 13 Pulse Width            | 5.8000                                          |
| 14 Acquisition Date       | 2018-06-21T21:46:28                             |
| 15 Spectrometer Frequency | 499.64                                          |
| 16 Spectral Width         | 8000.0                                          |
| 17 Lowest Frequency       | -1015.2                                         |
| 18 Nucleus                | <sup>1</sup> H                                  |
| 19 Acquired Size          | 24000                                           |
| 20 Spectral Size          | 65536                                           |

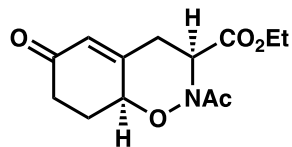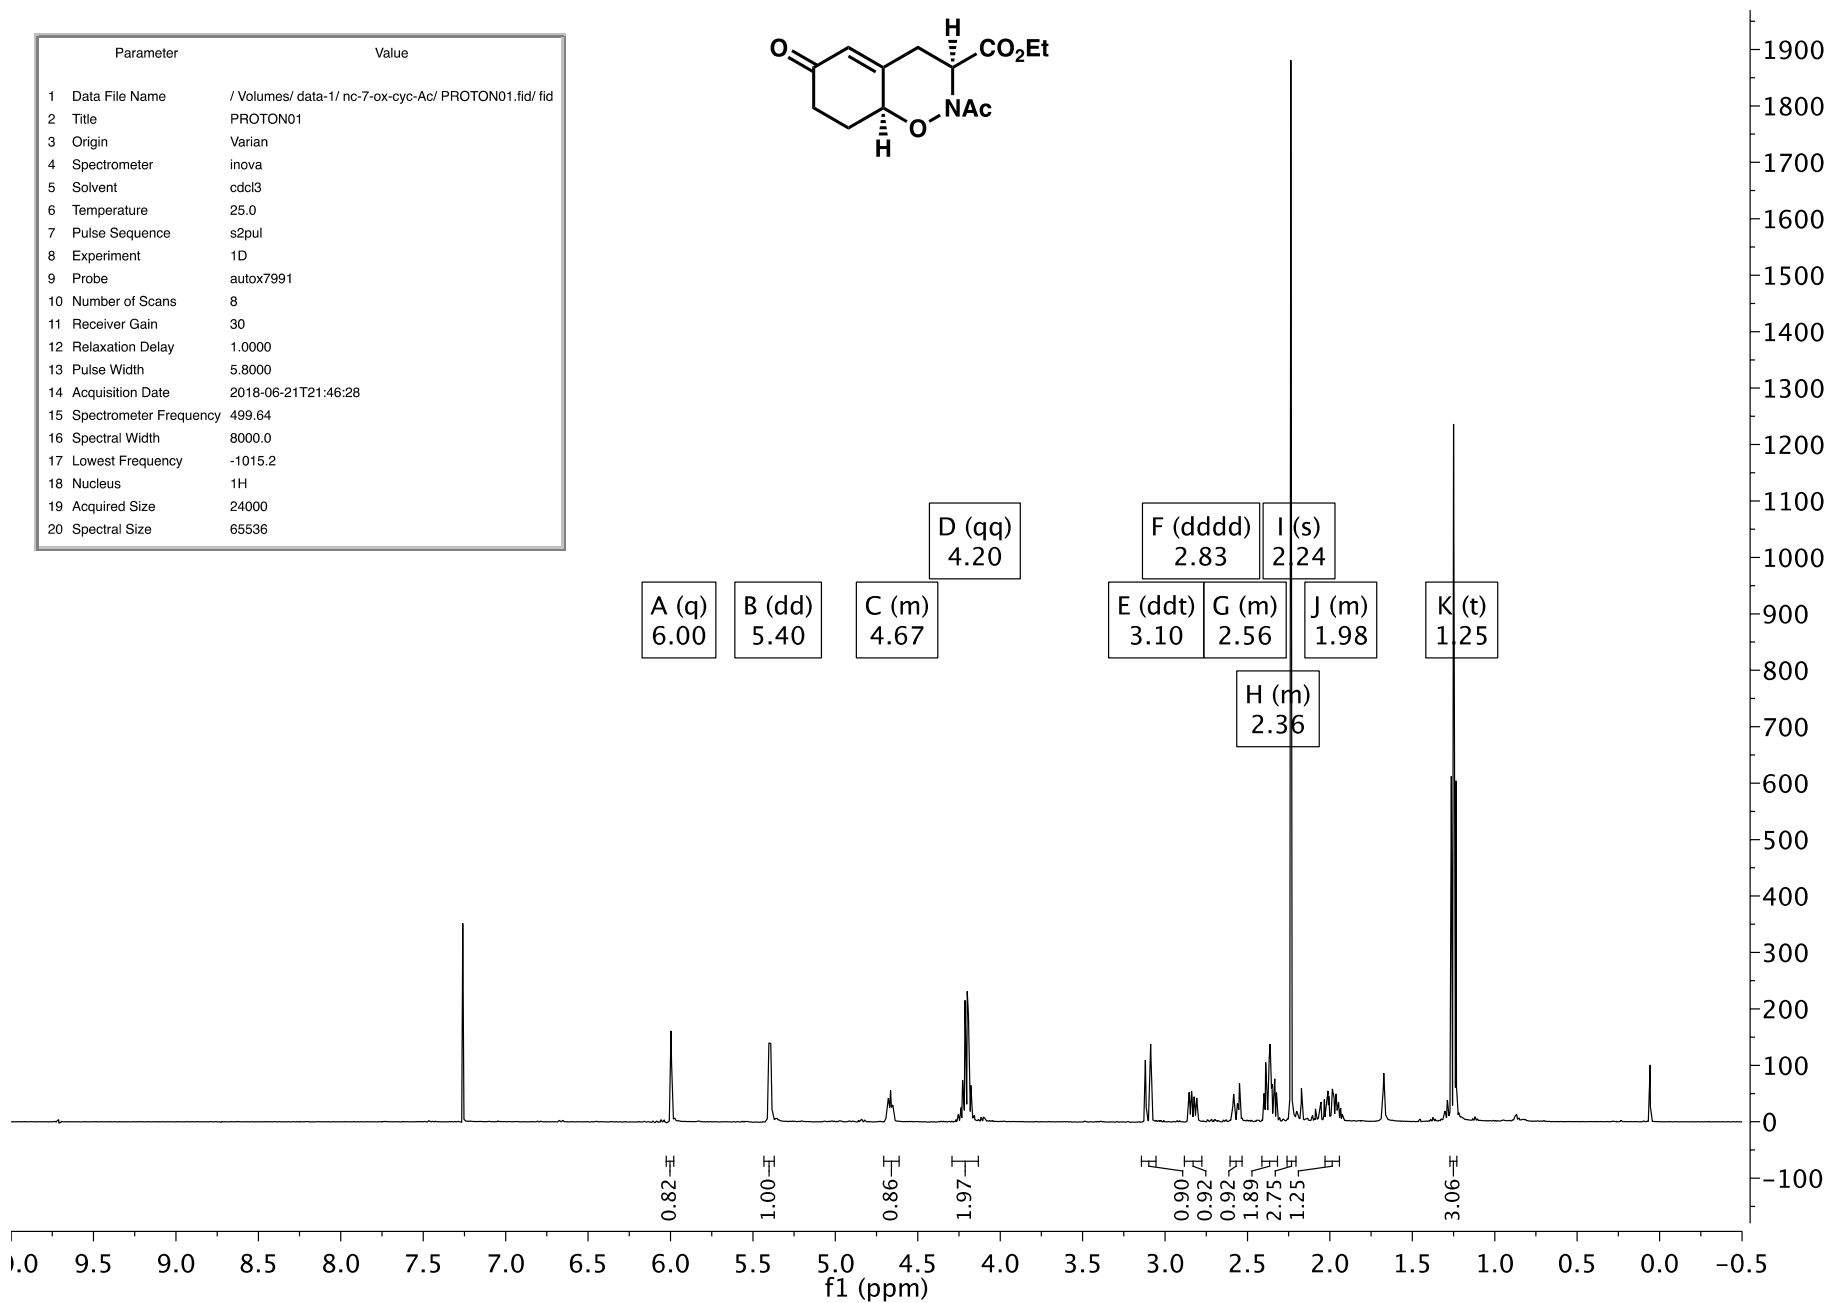



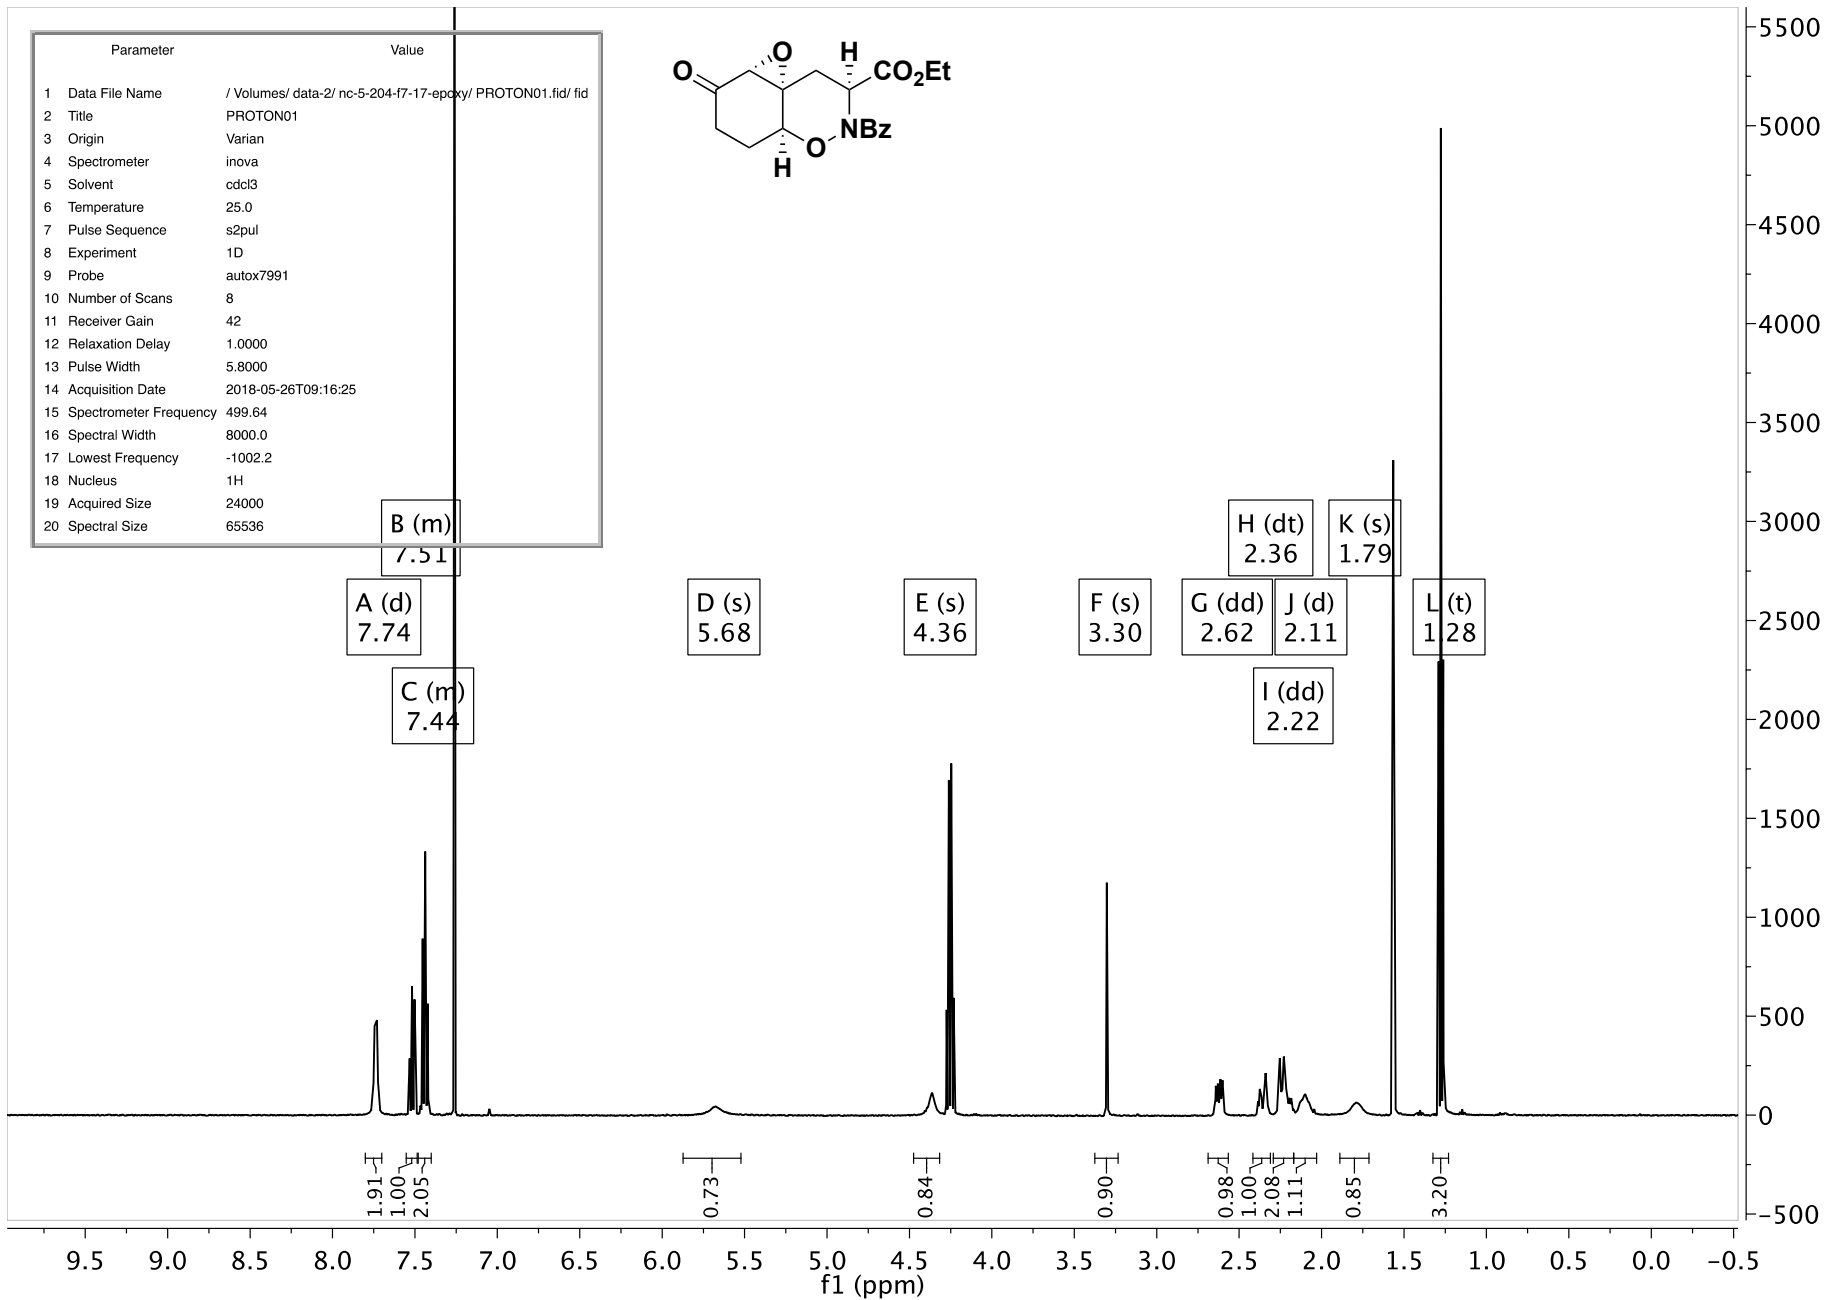

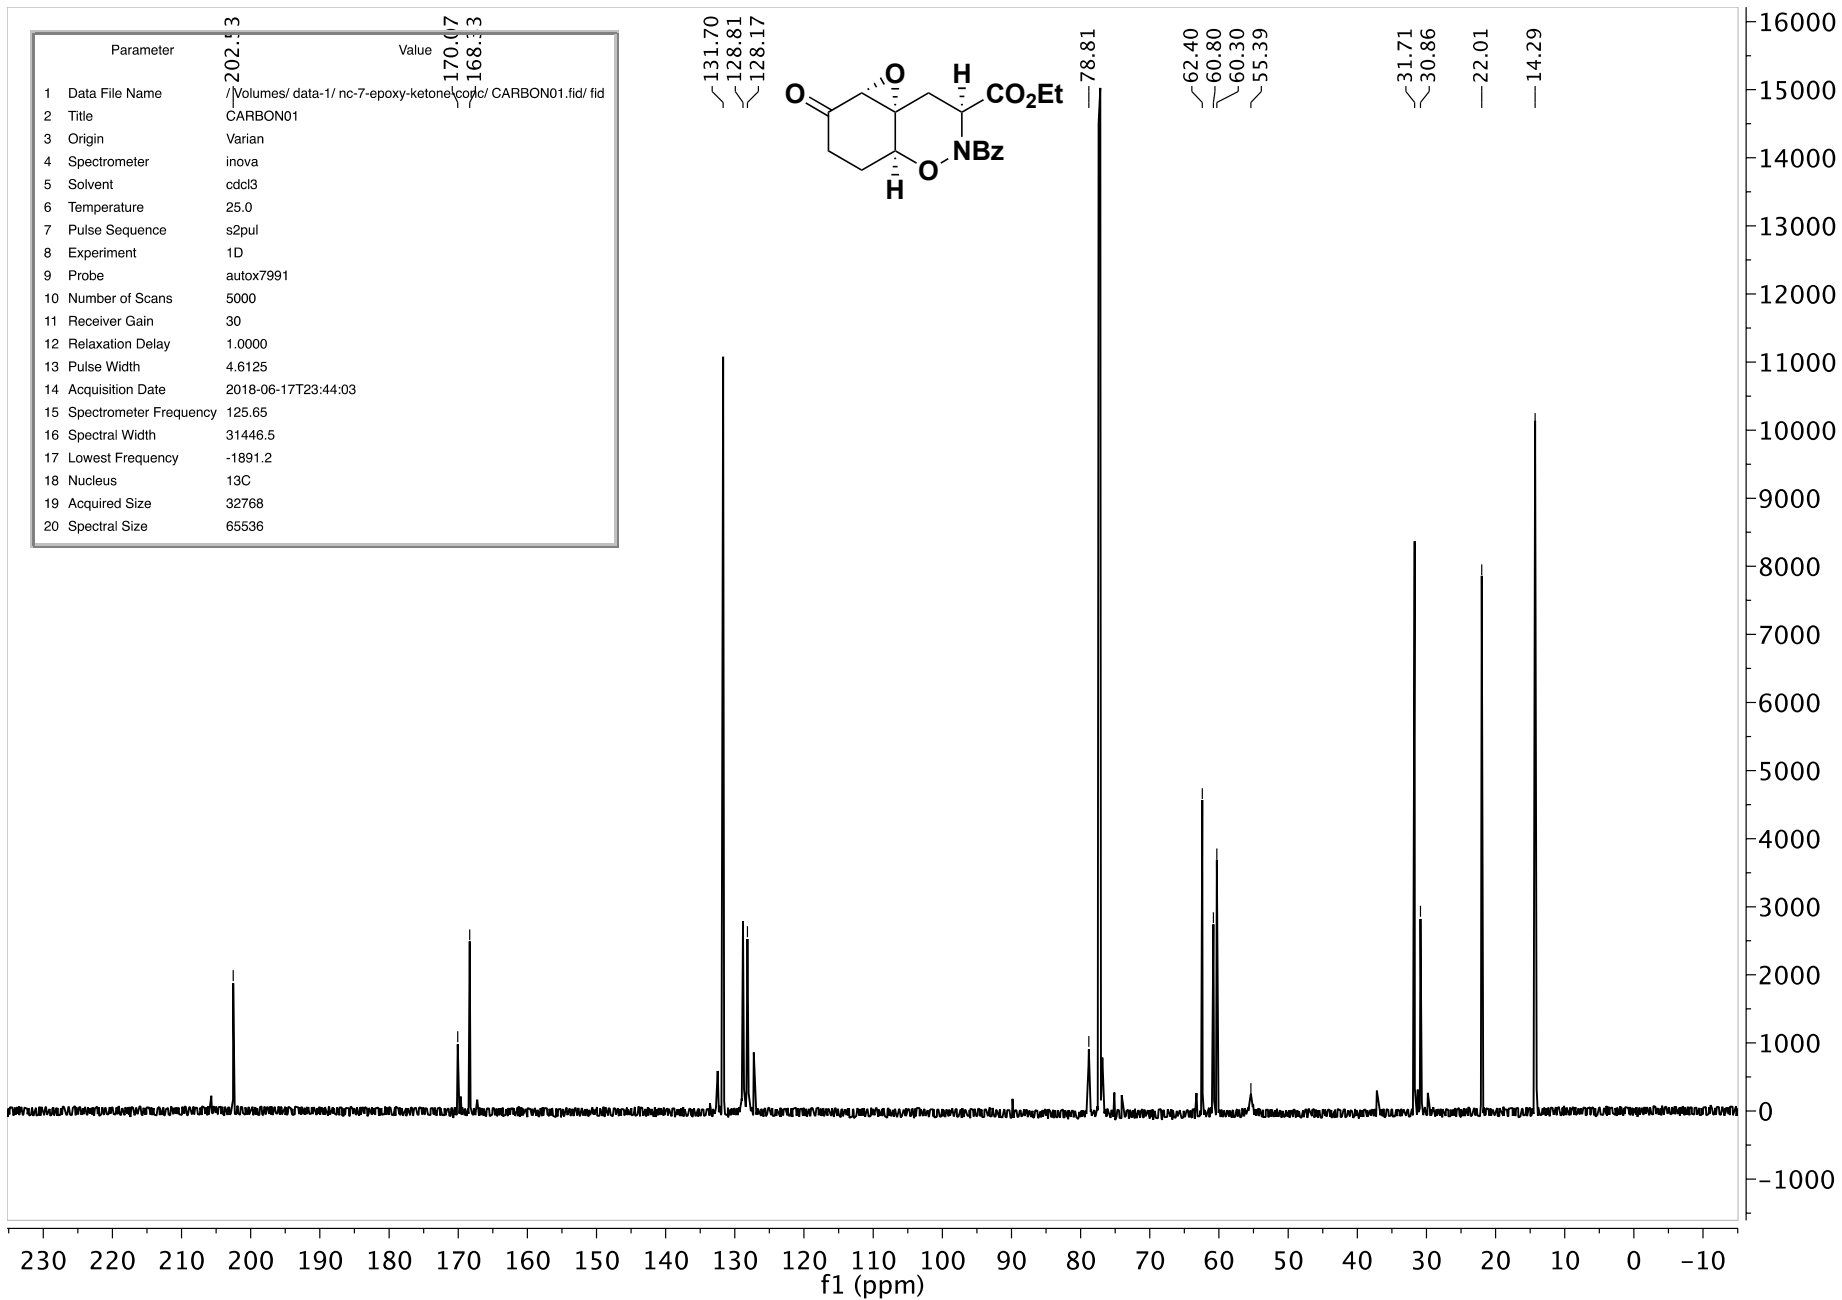

| Parameter                 | Value                                       |
|---------------------------|---------------------------------------------|
| 1 Data File Name          | /Volumes/nmr/nc-4-170-trit-f22-33/1/fid     |
| 2 Title                   | nc-4-170-trit-f22-33.1.fid                  |
| 3 Origin                  | Bruker BioSpin GmbH                         |
| 4 Solvent                 | CDCl3                                       |
| 5 Temperature             | 298.1                                       |
| 6 Pulse Sequence          | zg30                                        |
| 7 Probe                   | Z116098_0314 (PA BBO 400S1 BBF-H-D-05 Z SP) |
| 8 Number of Scans         | 16                                          |
| 9 Receiver Gain           | 112.8                                       |
| 10 Relaxation Delay       | 1.0000                                      |
| 11 Pulse Width            | 8.7000                                      |
| 12 Acquisition Time       | 4.0894                                      |
| 13 Acquisition Date       | 2016-02-10T13:10:30                         |
| 14 Spectrometer Frequency | 400.13                                      |
| 15 Spectral Width         | 8012.8                                      |
| 16 Lowest Frequency       | -1545.2                                     |
| 17 Nucleus                | 1H                                          |
| 18 Acquired Size          | 32768                                       |
| 19 Spectral Size          | 65536                                       |

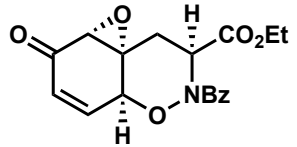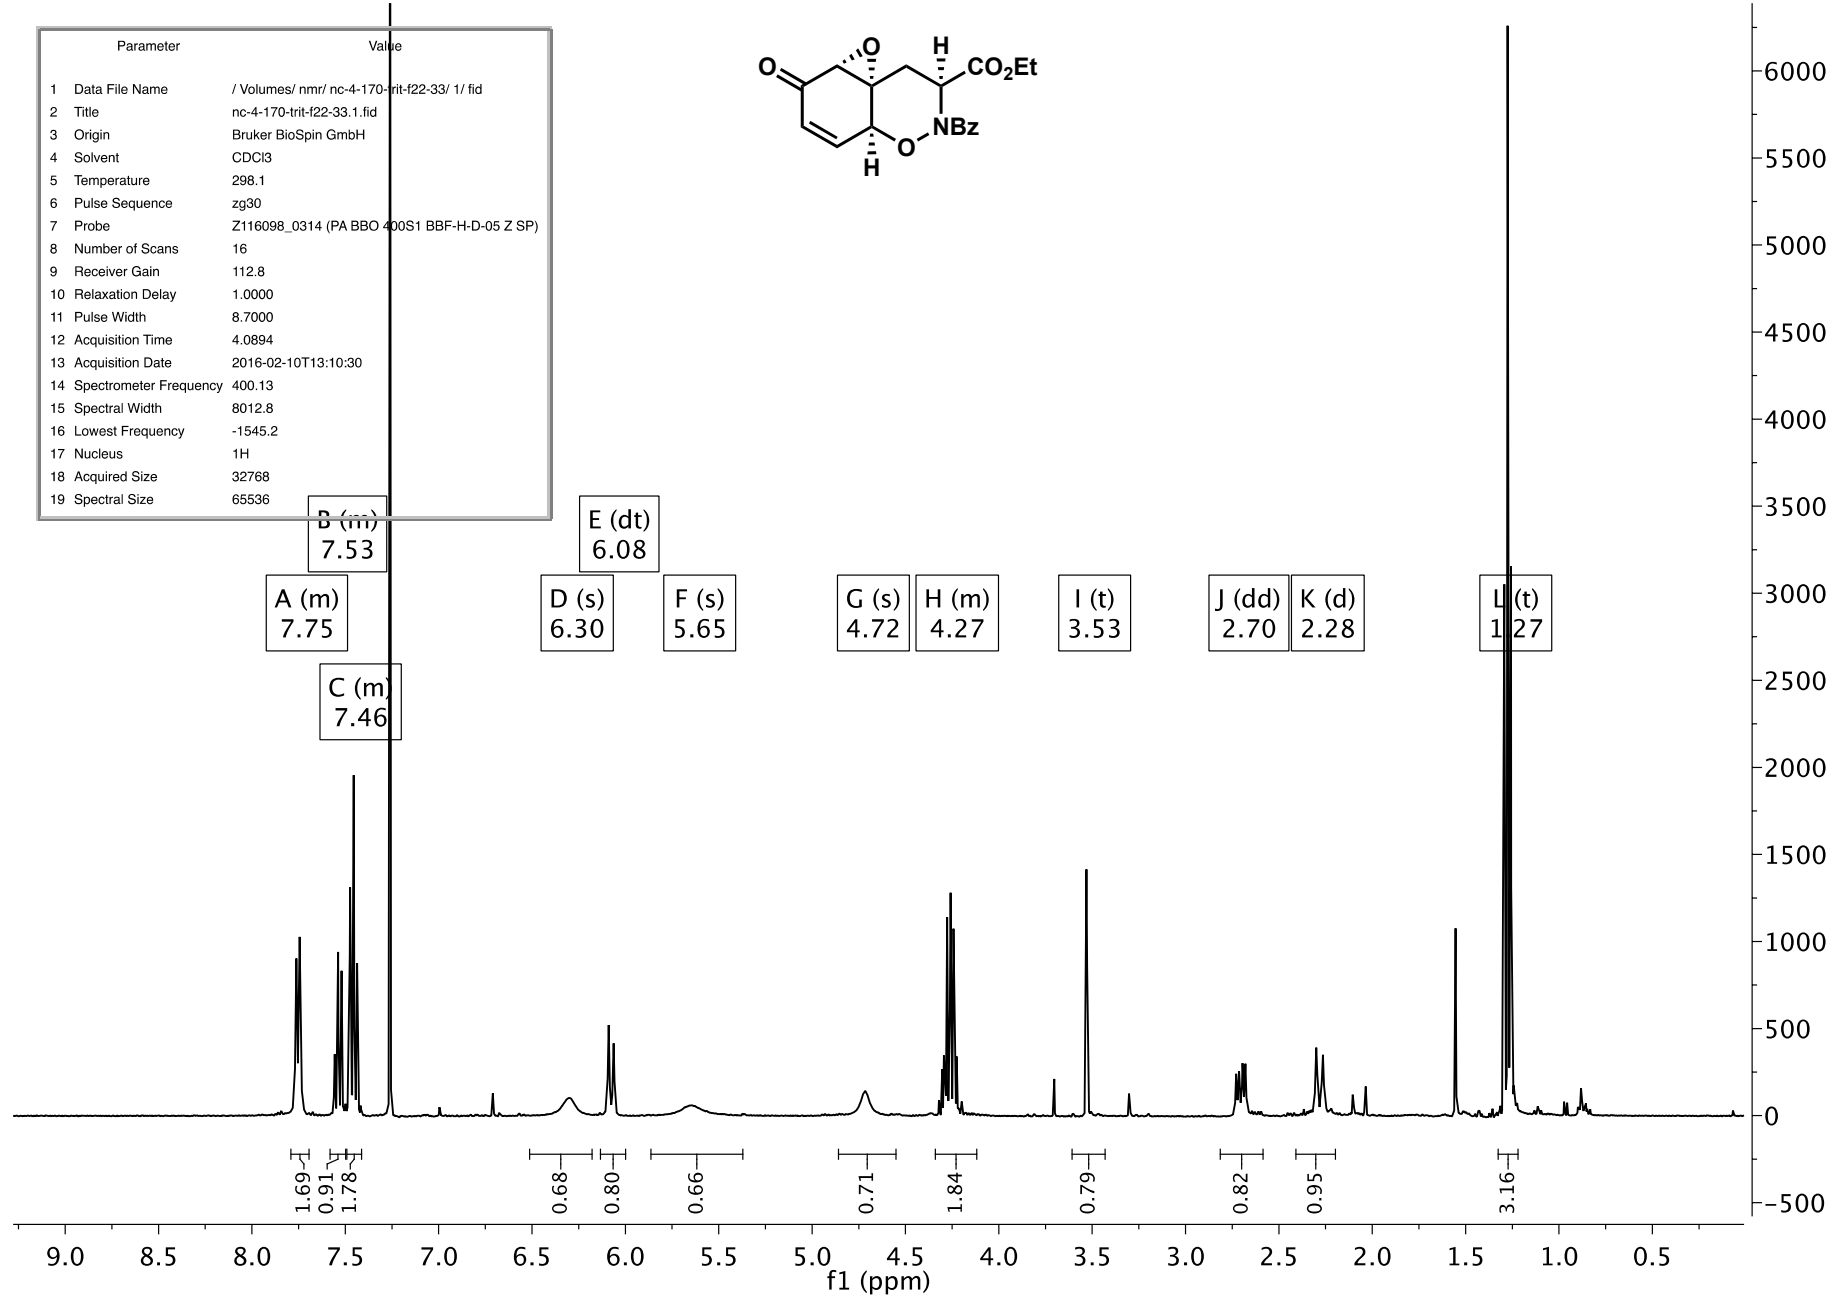

| Parameter                 | Value                                                 |
|---------------------------|-------------------------------------------------------|
| 1 Data File Name          | /Volumes/nmrdata/ncowper/nmr/nc-7-epoxy-enone-d.2.ser |
| 2 Title                   | nc-7-epoxy-enone-d.2.ser                              |
| 3 Origin                  | Bruker BioSpin GmbH                                   |
| 4 Solvent                 | CDCl3                                                 |
| 5 Temperature             | 295.1                                                 |
| 6 Pulse Sequence          | hsqcetgpcisp2.4                                       |
| 7 Probe                   | Z122623_0045 (CPP BBO 400S1 BB-H&F-D-05 Z)            |
| 8 Number of Scans         | 2                                                     |
| 9 Receiver Gain           | 197.4                                                 |
| 10 Relaxation Delay       | 1.5000                                                |
| 11 Pulse Width            | 11.7000                                               |
| 12 Acquisition Time       | 0.2135                                                |
| 13 Acquisition Date       | 2018-06-21T14:20:38                                   |
| 14 Spectrometer Frequency | (400.13, 100.62)                                      |
| 15 Spectral Width         | (4795.4, 16611.3)                                     |
| 16 Lowest Frequency       | (-521.9, -1262.8)                                     |
| 17 Nucleus                | (1H, 13C)                                             |
| 18 Acquired Size          | (1024, 180)                                           |
| 19 Spectral Size          | (1024, 1024)                                          |

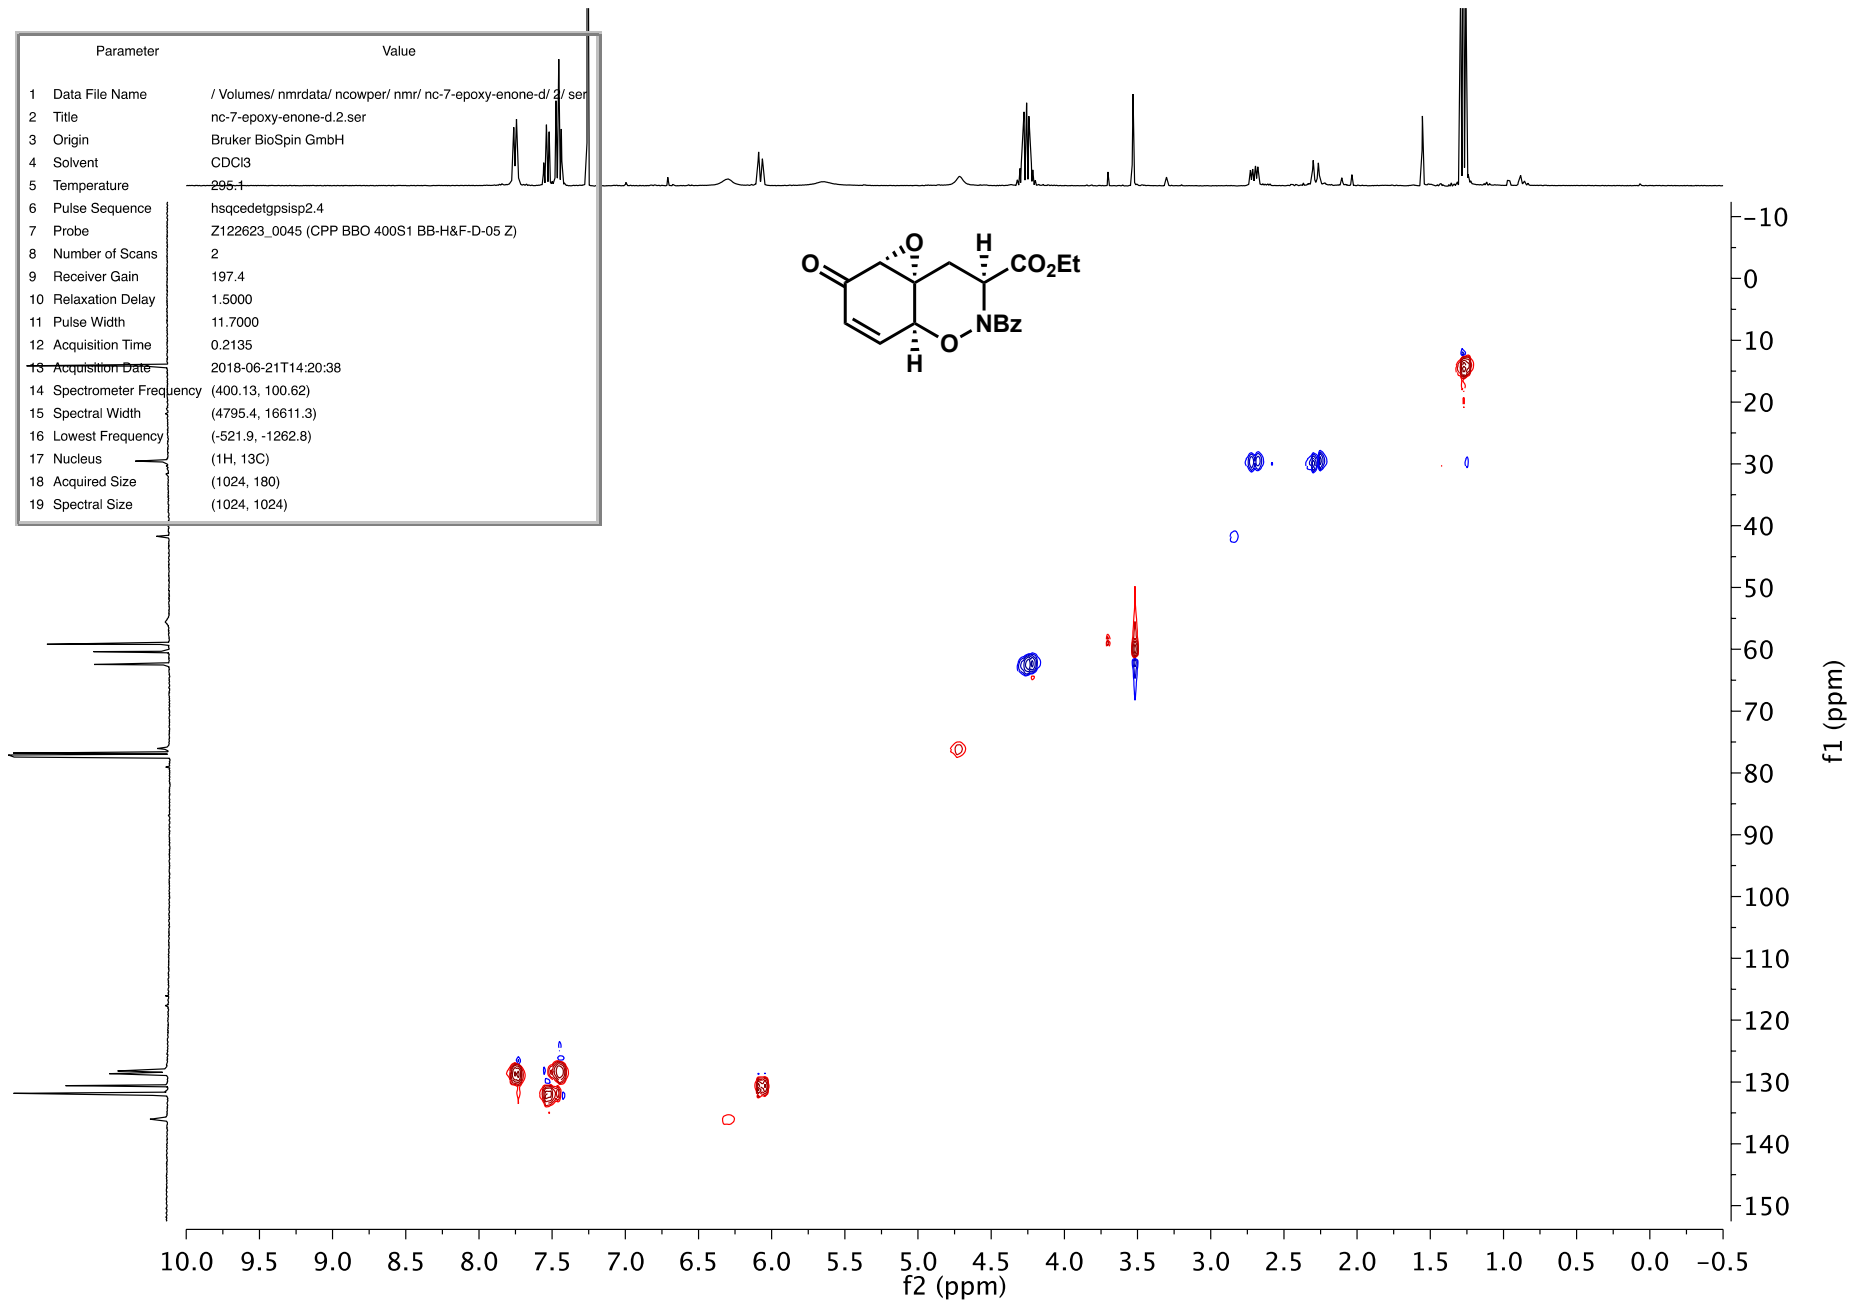



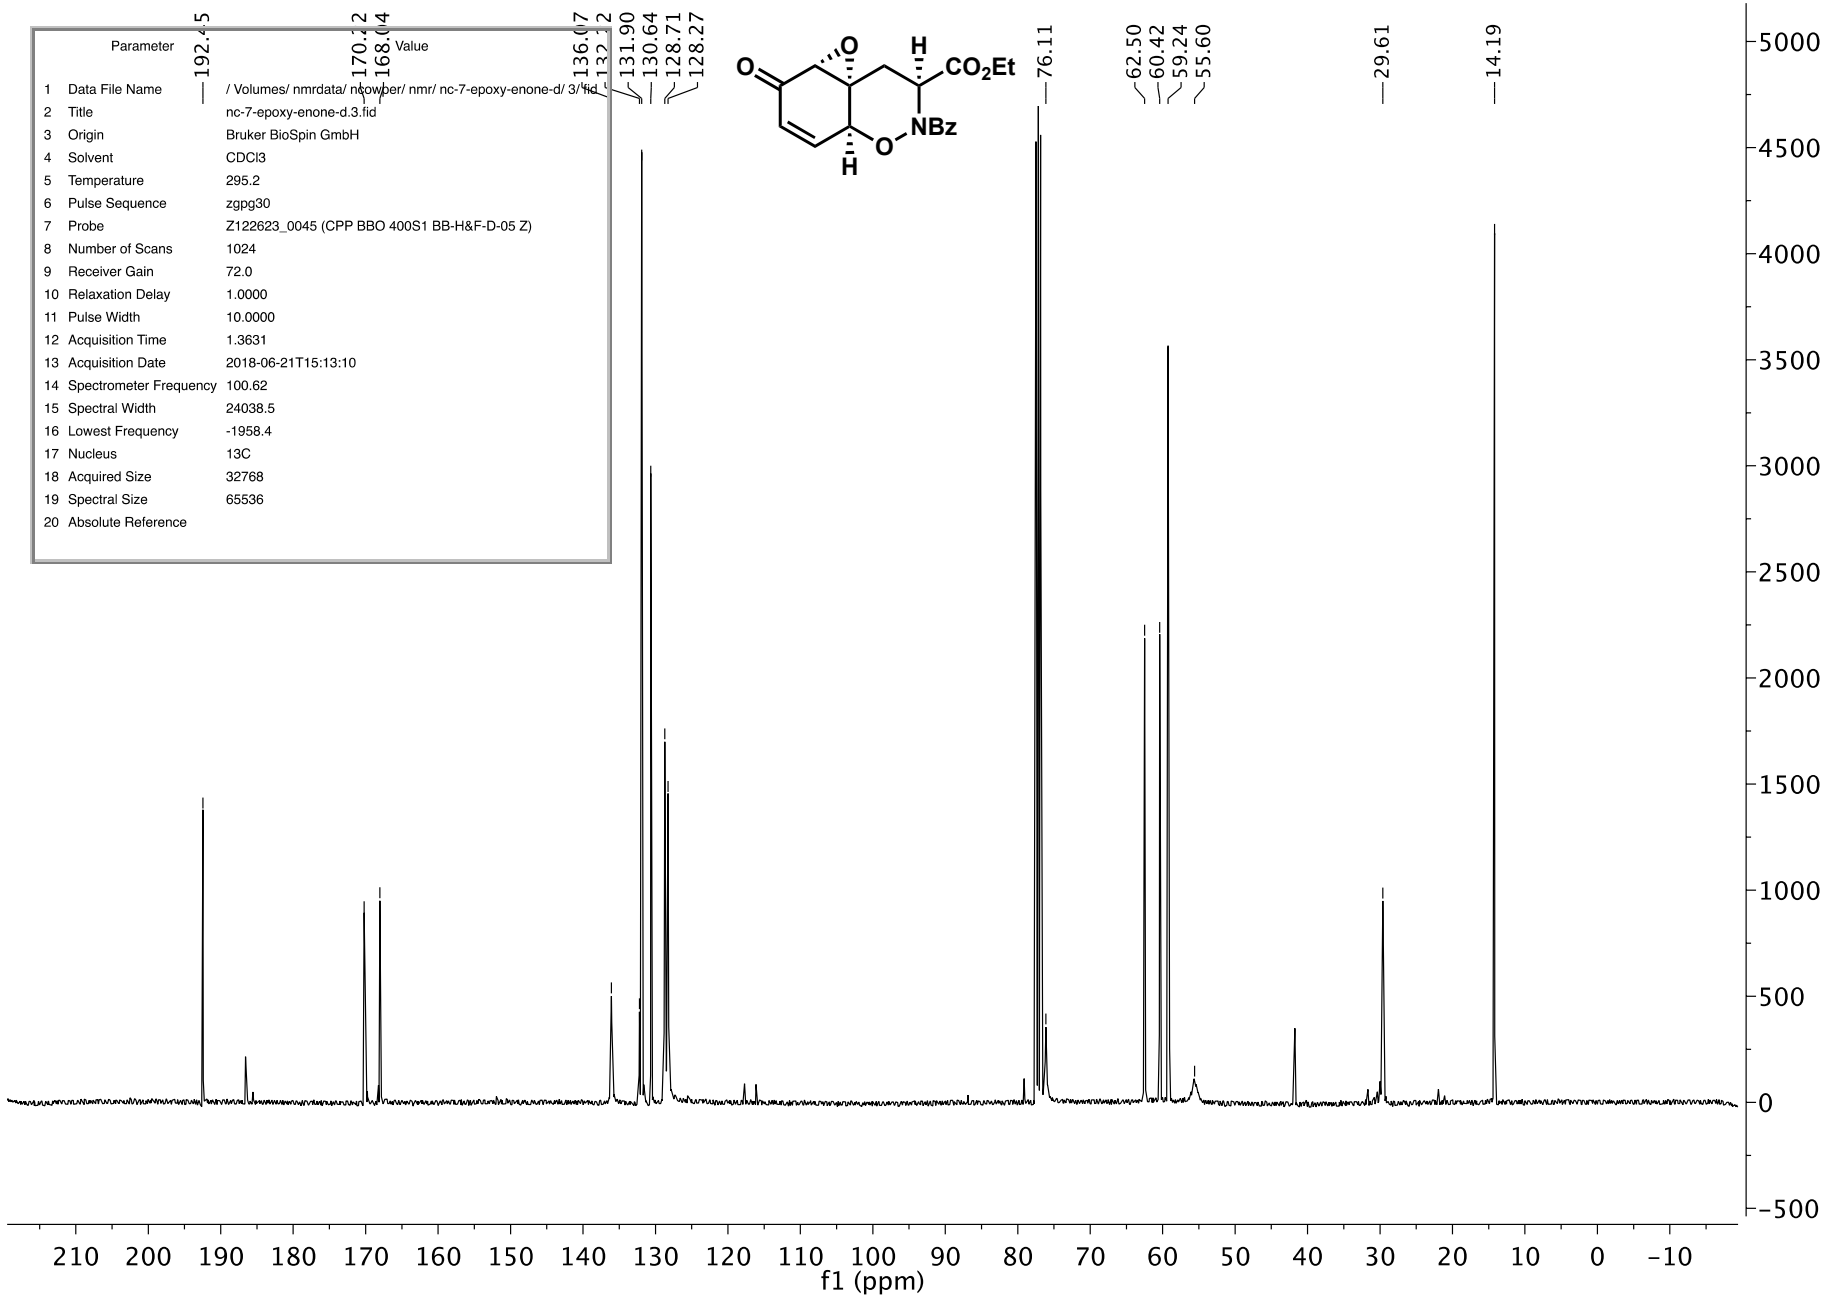

| Parameter                 | Value                                     |
|---------------------------|-------------------------------------------|
| 1 Data File Name          | /Volumes/ data/ nc-4-196-20C-1sc.fid/ fid |
| 2 Title                   | nc-4-196-20C-1sc                          |
| 3 Origin                  | Varian                                    |
| 4 Spectrometer            | vnmsr                                     |
| 5 Solvent                 | cdcl3                                     |
| 6 Temperature             | 75.0                                      |
| 7 Pulse Sequence          | s2pul                                     |
| 8 Experiment              | 1D                                        |
| 9 Probe                   | OneNMR                                    |
| 10 Number of Scans        | 1                                         |
| 11 Receiver Gain          | 16                                        |
| 12 Relaxation Delay       | 1.0000                                    |
| 13 Pulse Width            | 4.1500                                    |
| 14 Acquisition Date       | 2016-03-02T17:11:28                       |
| 15 Spectrometer Frequency | 399.80                                    |
| 16 Spectral Width         | 6410.3                                    |
| 17 Lowest Frequency       | -806.4                                    |
| 18 Nucleus                | <sup>1</sup> H                            |
| 19 Acquired Size          | 12821                                     |
| 20 Spectral Size          | 65536                                     |

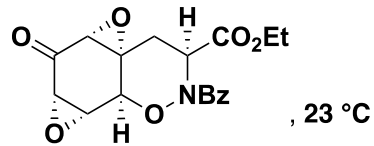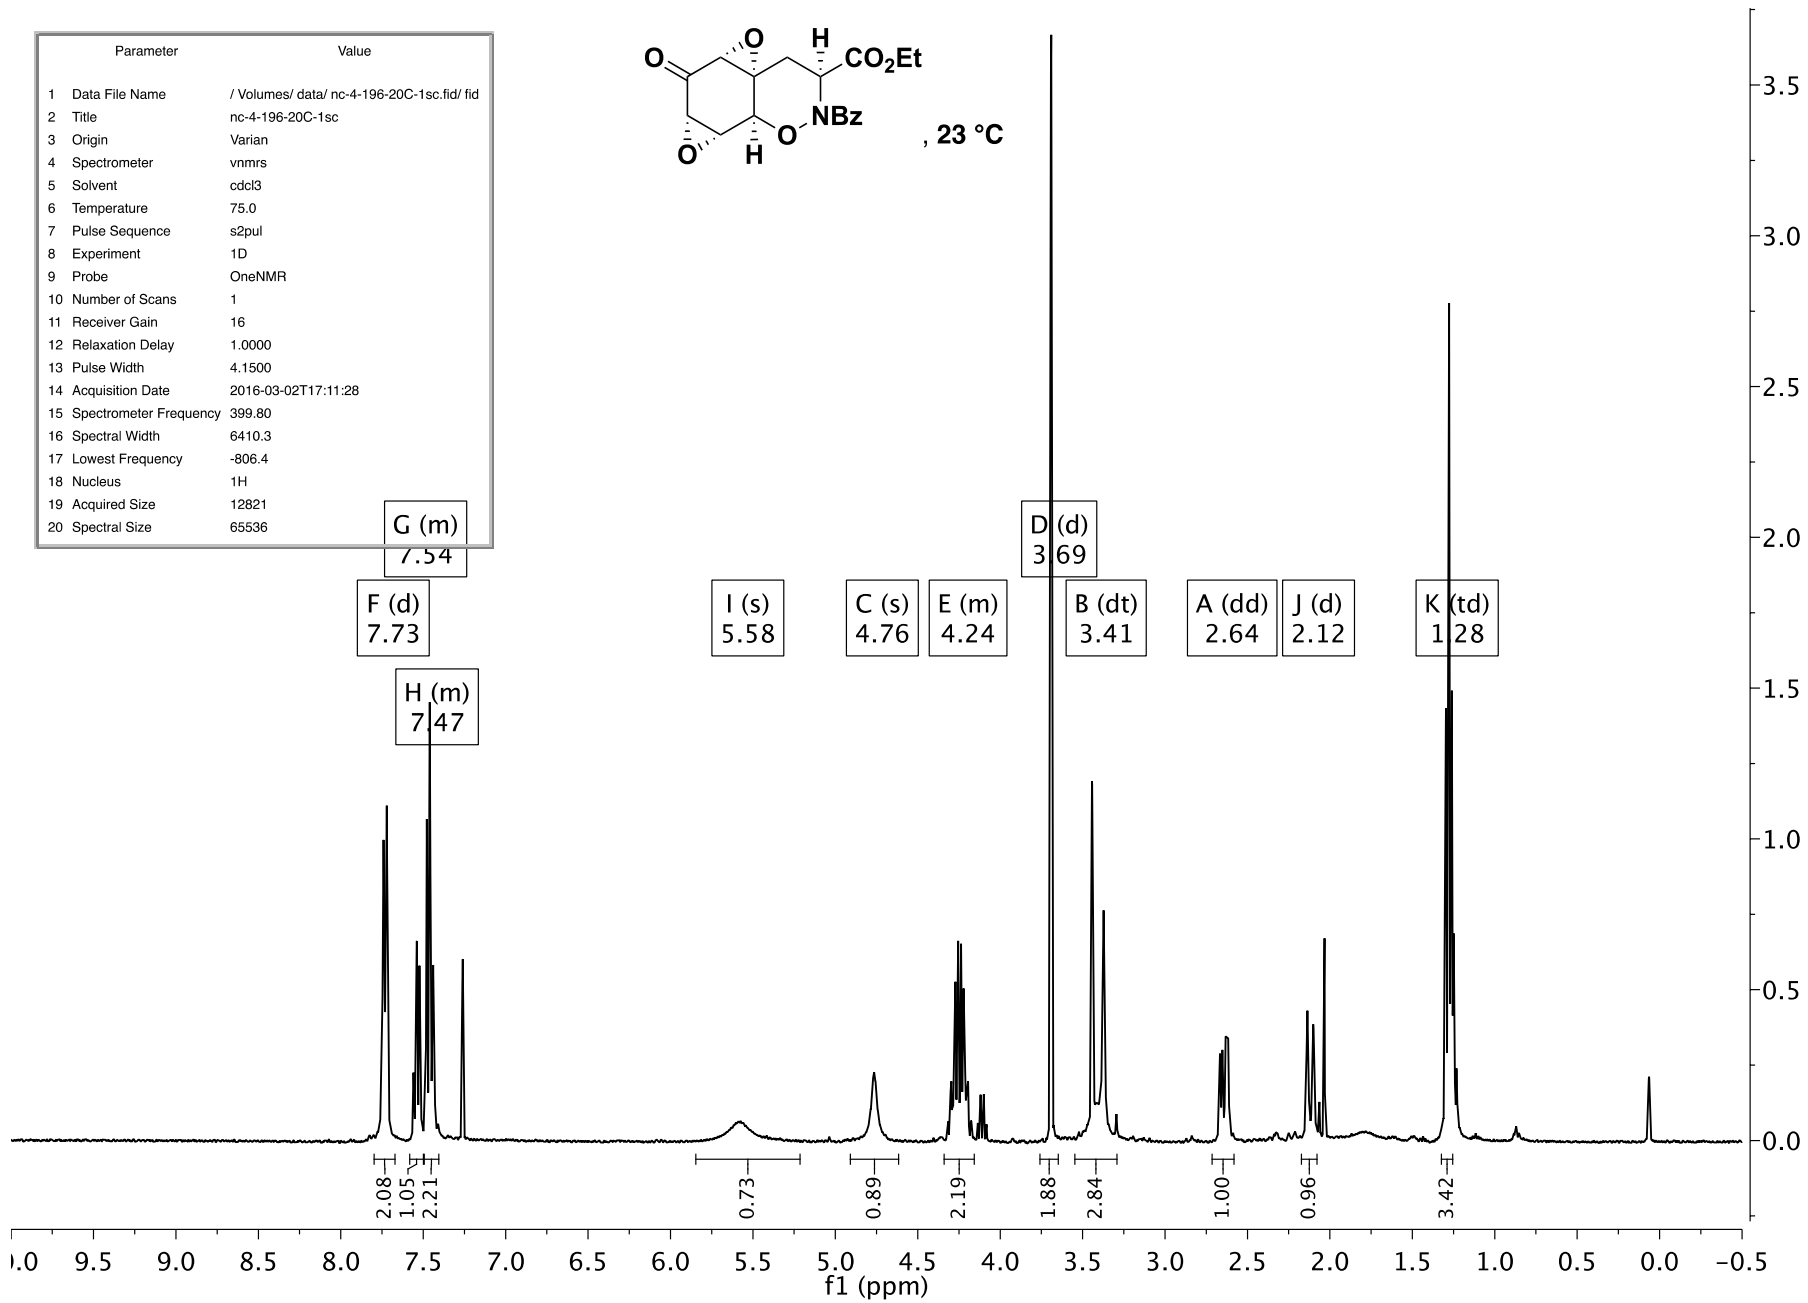

| Parameter                 | Value                                                    |
|---------------------------|----------------------------------------------------------|
| 1 Data File Name          | /Volumes/ data/ nc-4-196-46C-shimmed-1sc-10s-at.fid/ fid |
| 2 Title                   | nc-4-196-46C-shimmed-1sc-10s-at                          |
| 3 Origin                  | Varian                                                   |
| 4 Spectrometer            | vnmrs                                                    |
| 5 Solvent                 | cdcl3                                                    |
| 6 Temperature             | 46.0                                                     |
| 7 Pulse Sequence          | s2pul                                                    |
| 8 Experiment              | 1D                                                       |
| 9 Probe                   | OneNMR                                                   |
| 10 Number of Scans        | 1                                                        |
| 11 Receiver Gain          | 48                                                       |
| 12 Relaxation Delay       | 1.0000                                                   |
| 13 Pulse Width            | 4.1500                                                   |
| 14 Acquisition Date       | 2016-03-02T17:38:56                                      |
| 15 Spectrometer Frequency | 399.80                                                   |
| 16 Spectral Width         | 6410.3                                                   |
| 17 Lowest Frequency       | -806.4                                                   |
| 18 Nucleus                | <sup>1</sup> H                                           |
| 19 Acquired Size          | 64103                                                    |
| 20 Spectral Size          | 131072                                                   |

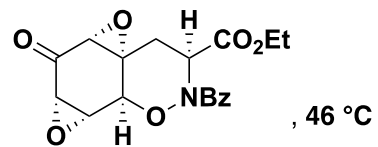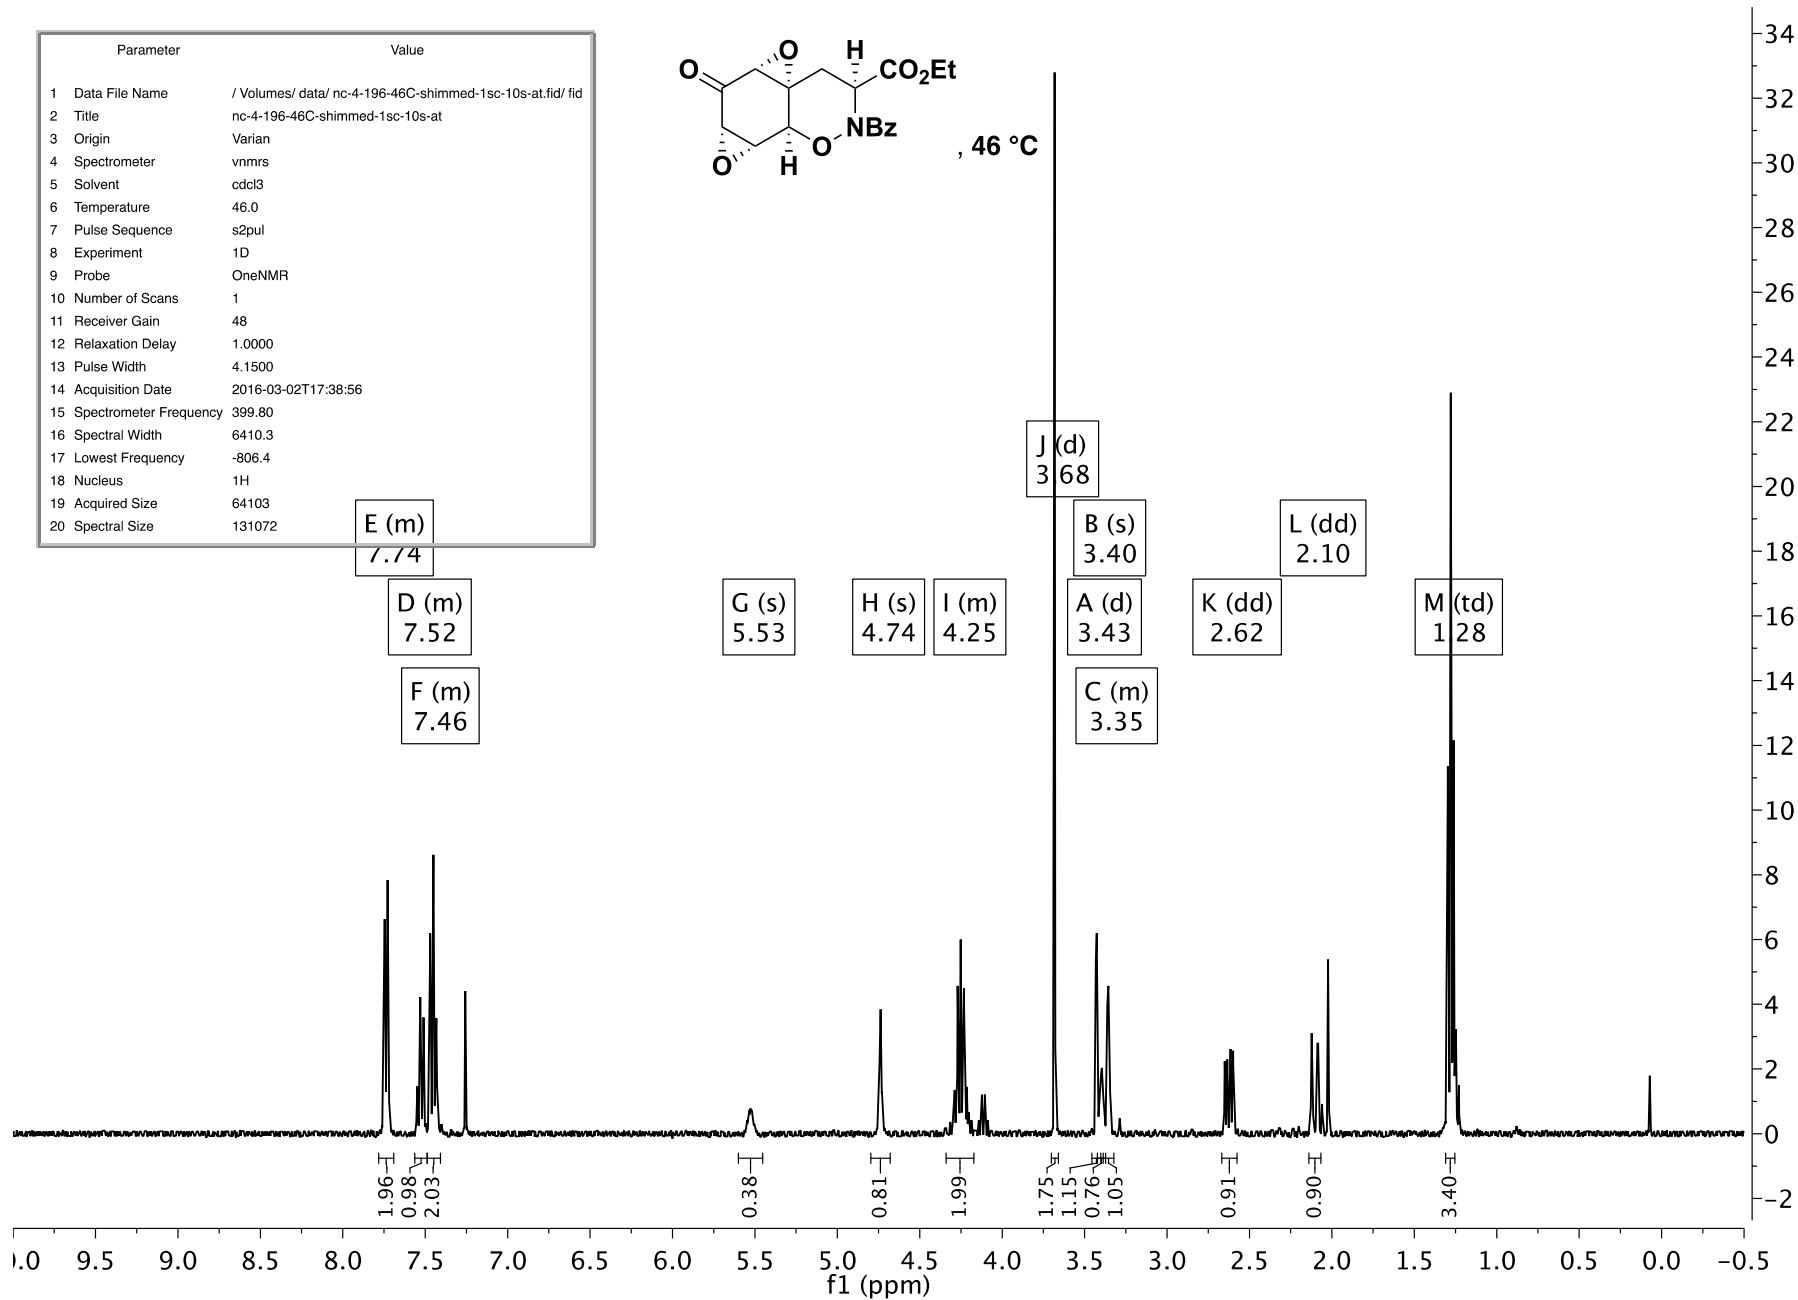

E (m)  
7.74

D (m)  
7.52

F (m)  
7.46

G (s)  
5.53

H (s)  
4.74

I (m)  
4.25

J (d)  
3.68

B (s)  
3.40

A (d)  
3.43

C (m)  
3.35

K (dd)  
2.62

L (dd)  
2.10

M (td)  
1.28

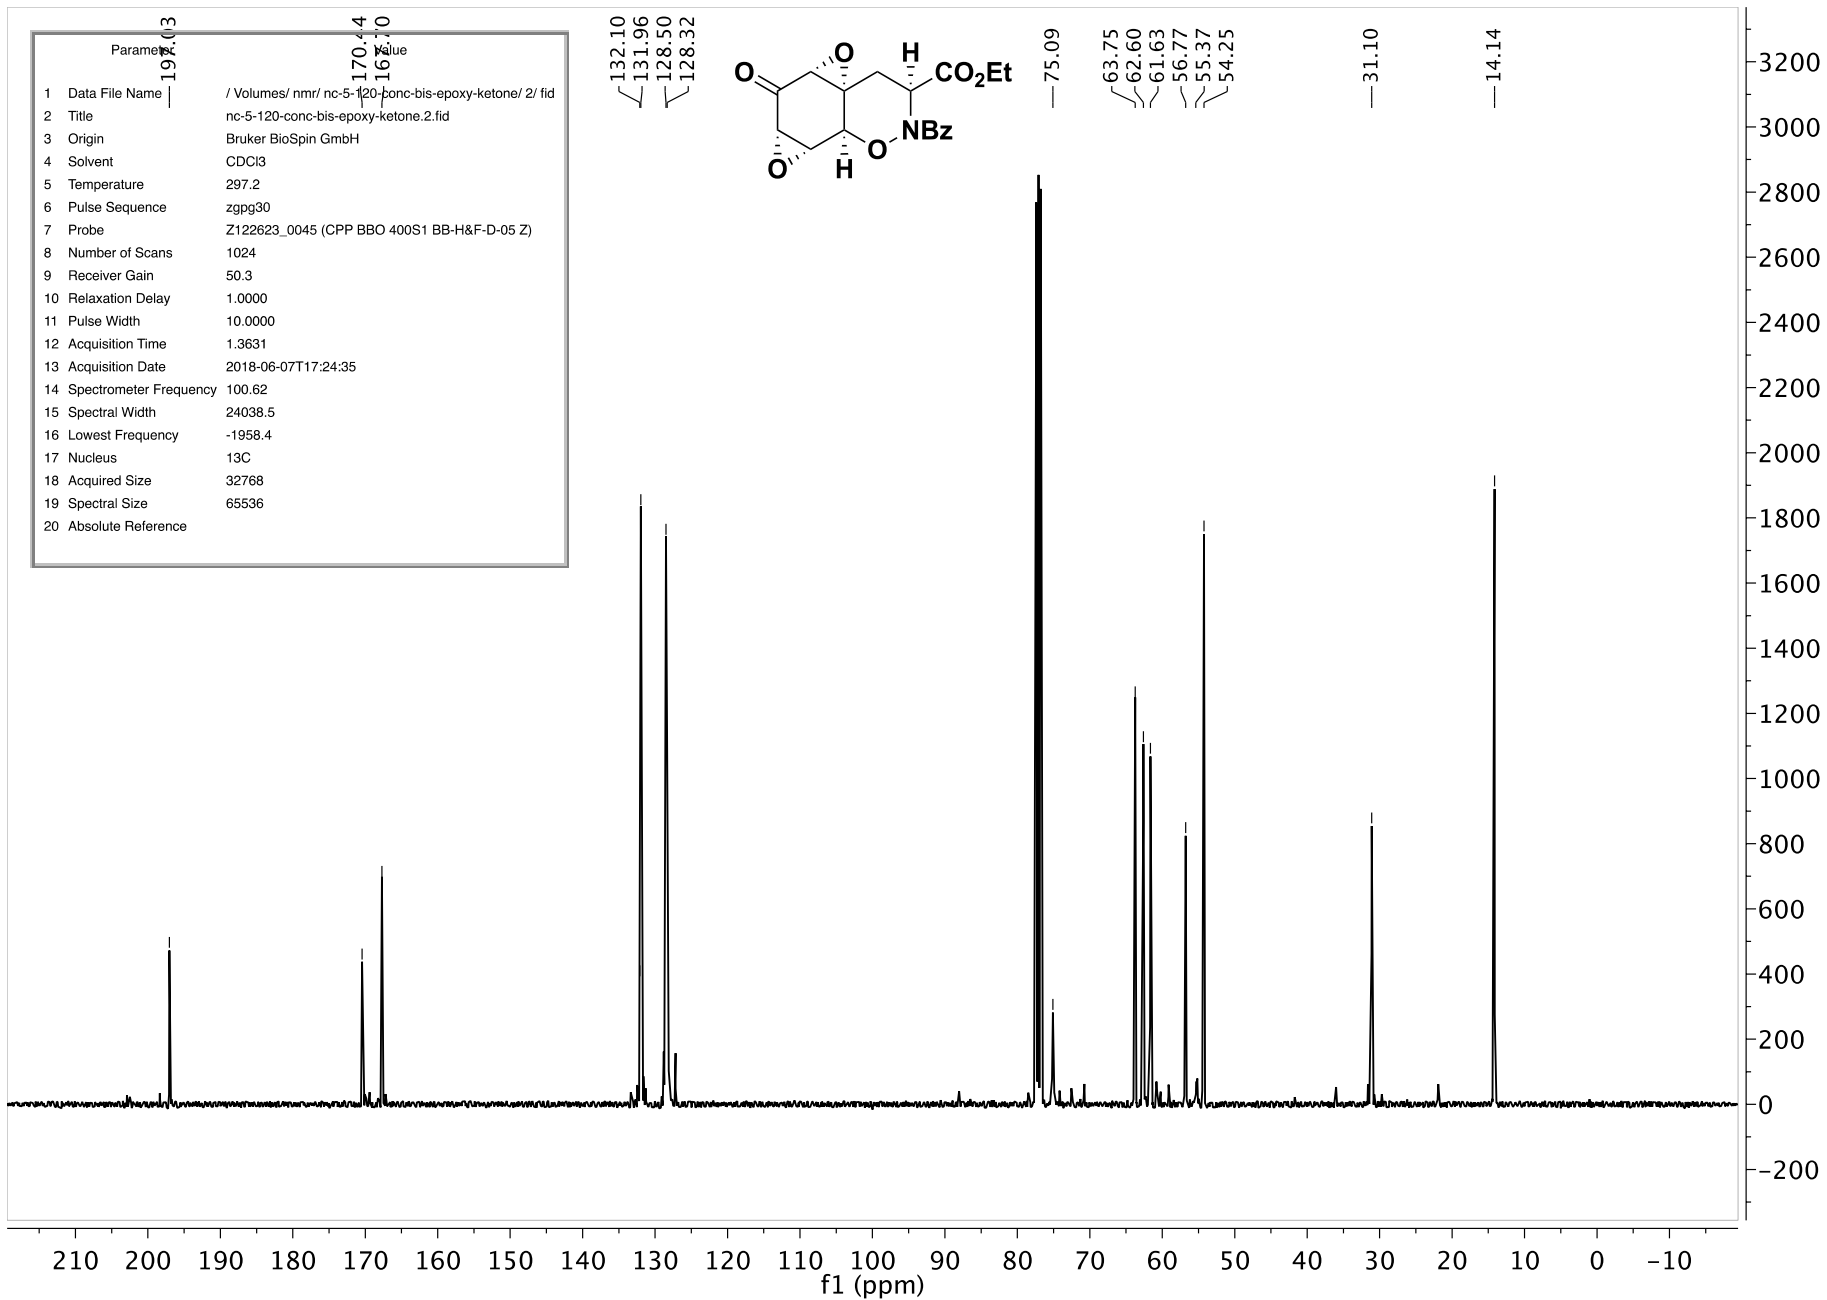



| Parameter                 | Value                                                 |
|---------------------------|-------------------------------------------------------|
| 1 Data File Name          | /Volumes/nmrdata/ncowper/nmr/nc-7-wharton-15-19/1.fid |
| 2 Title                   | nc-7-wharton-15-19.1.fid                              |
| 3 Origin                  | Bruker BioSpin GmbH                                   |
| 4 Solvent                 | CDCl3                                                 |
| 5 Temperature             | 295.1                                                 |
| 6 Pulse Sequence          | zg30                                                  |
| 7 Probe                   | Z122623_0045 (CPP BBO 400S1 BB-H&F-D-05 Z)            |
| 8 Number of Scans         | 16                                                    |
| 9 Receiver Gain           | 197.4                                                 |
| 10 Relaxation Delay       | 1.0000                                                |
| 11 Pulse Width            | 11.7000                                               |
| 12 Acquisition Time       | 4.0894                                                |
| 13 Acquisition Date       | 2018-06-28T19:35:08                                   |
| 14 Spectrometer Frequency | 400.13                                                |
| 15 Spectral Width         | 8012.8                                                |
| 16 Lowest Frequency       | -1545.5                                               |
| 17 Nucleus                | 1H                                                    |
| 18 Acquired Size          | 32768                                                 |
| 19 Spectral Size          | 65536                                                 |
| 20 Absolute Reference     |                                                       |

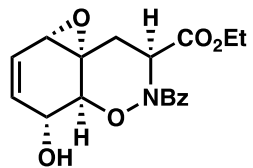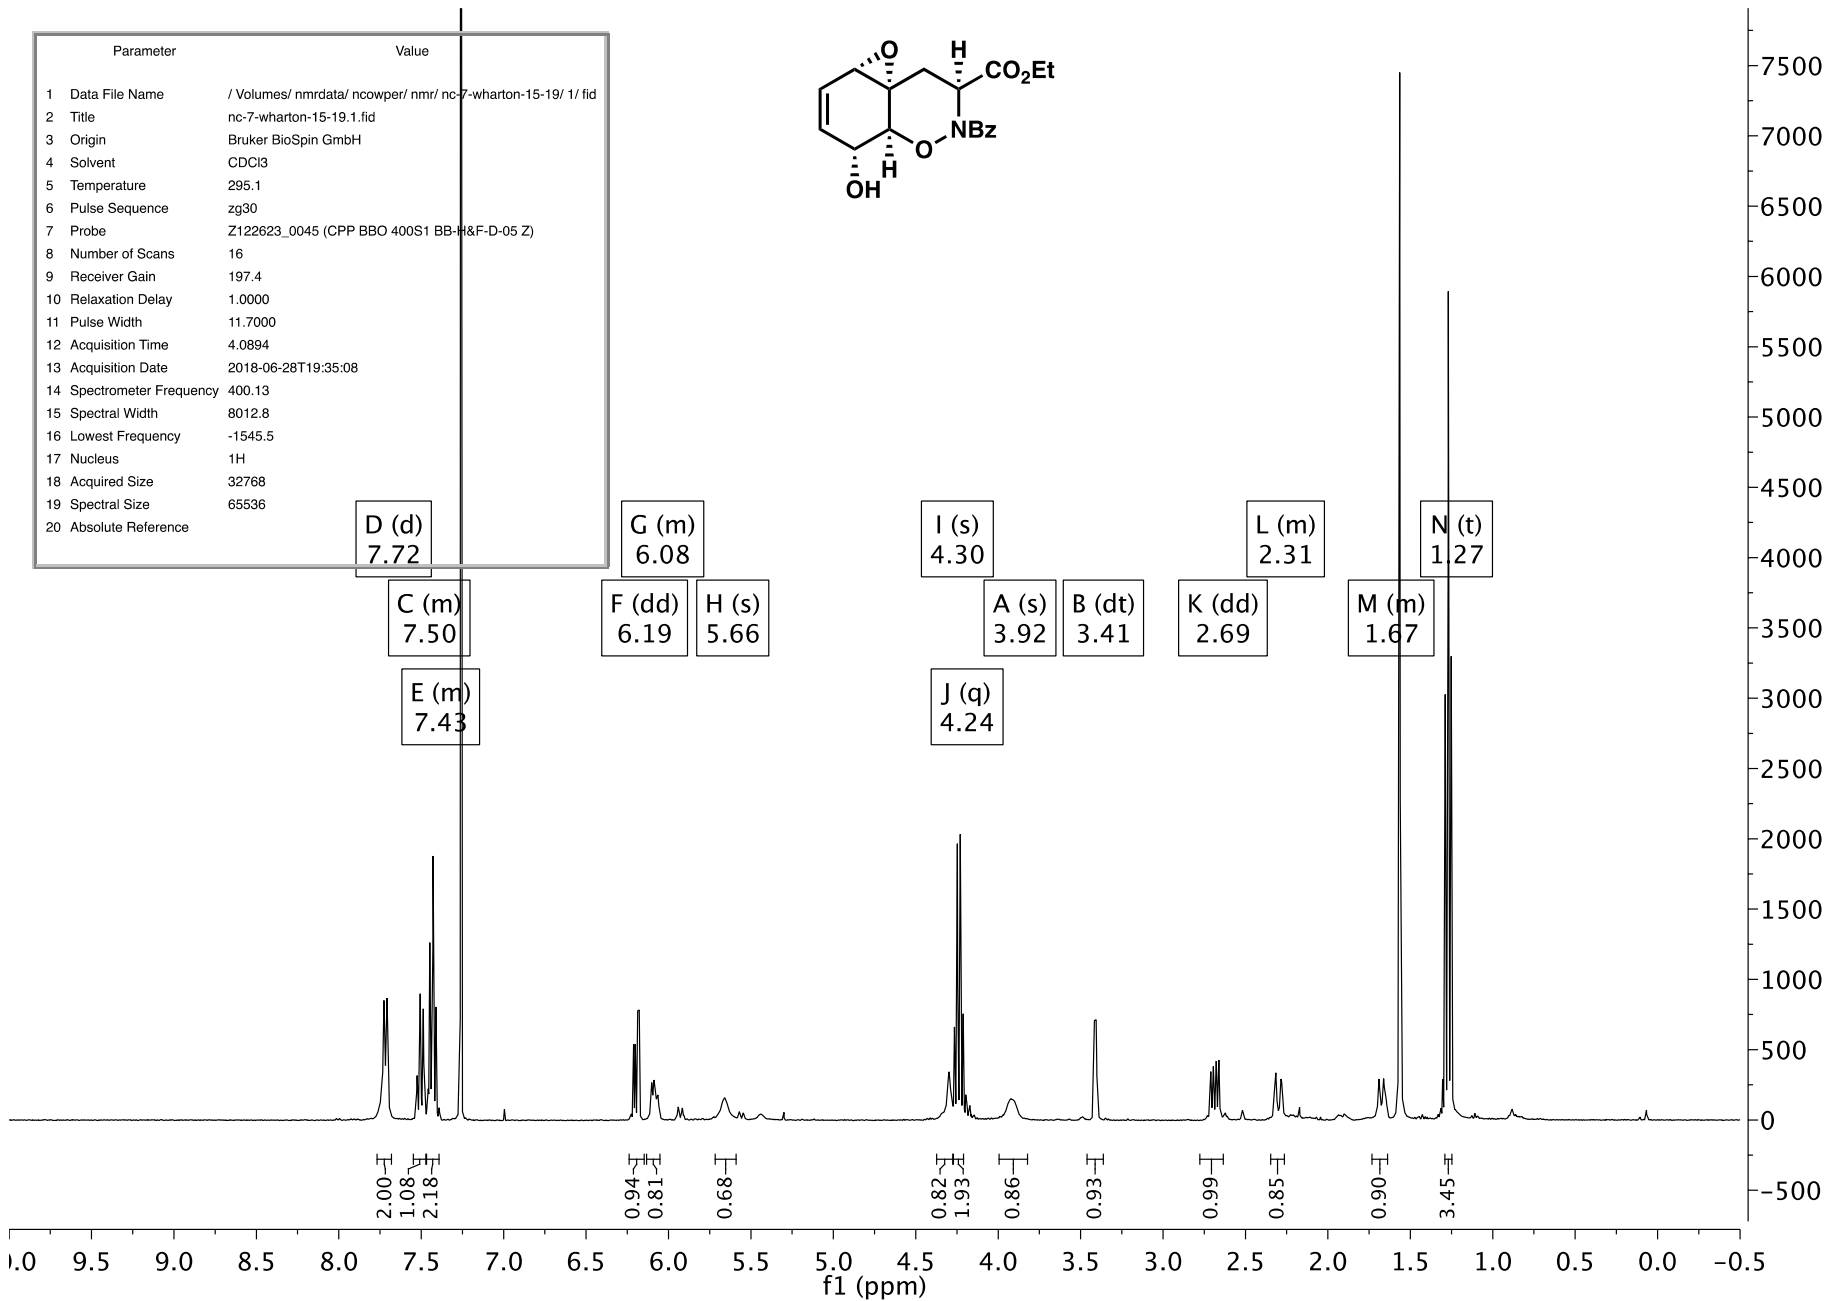

| Parameter                 |                                            |
|---------------------------|--------------------------------------------|
| 1 Data File Name          | /Volumes/nmr/nc-7-wharton-15-19/2/ fid     |
| 2 Title                   | nc-7-wharton-15-19.2.fid                   |
| 3 Origin                  | Bruker BioSpin GmbH                        |
| 4 Solvent                 | CDCl3                                      |
| 5 Temperature             | 295.2                                      |
| 6 Pulse Sequence          | zgpg30                                     |
| 7 Probe                   | Z122623_0045 (CPP BBO 400S1 BB-H&F-D-05 Z) |
| 8 Number of Scans         | 1500                                       |
| 9 Receiver Gain           | 64.2                                       |
| 10 Relaxation Delay       | 1.0000                                     |
| 11 Pulse Width            | 10.0000                                    |
| 12 Acquisition Time       | 1.3631                                     |
| 13 Acquisition Date       | 2018-06-29T00:39:48                        |
| 14 Spectrometer Frequency | 100.62                                     |
| 15 Spectral Width         | 24038.5                                    |
| 16 Lowest Frequency       | -1944.9                                    |
| 17 Nucleus                | 13C                                        |
| 18 Acquired Size          | 32768                                      |
| 19 Spectral Size          | 65536                                      |
| 20 Absolute Reference     |                                            |

136.71  
133.28  
131.70  
128.76  
128.19  
126.98

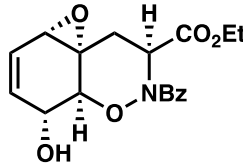

81.68

64.57  
62.28  
59.83  
55.26  
54.45

31.04

14.34

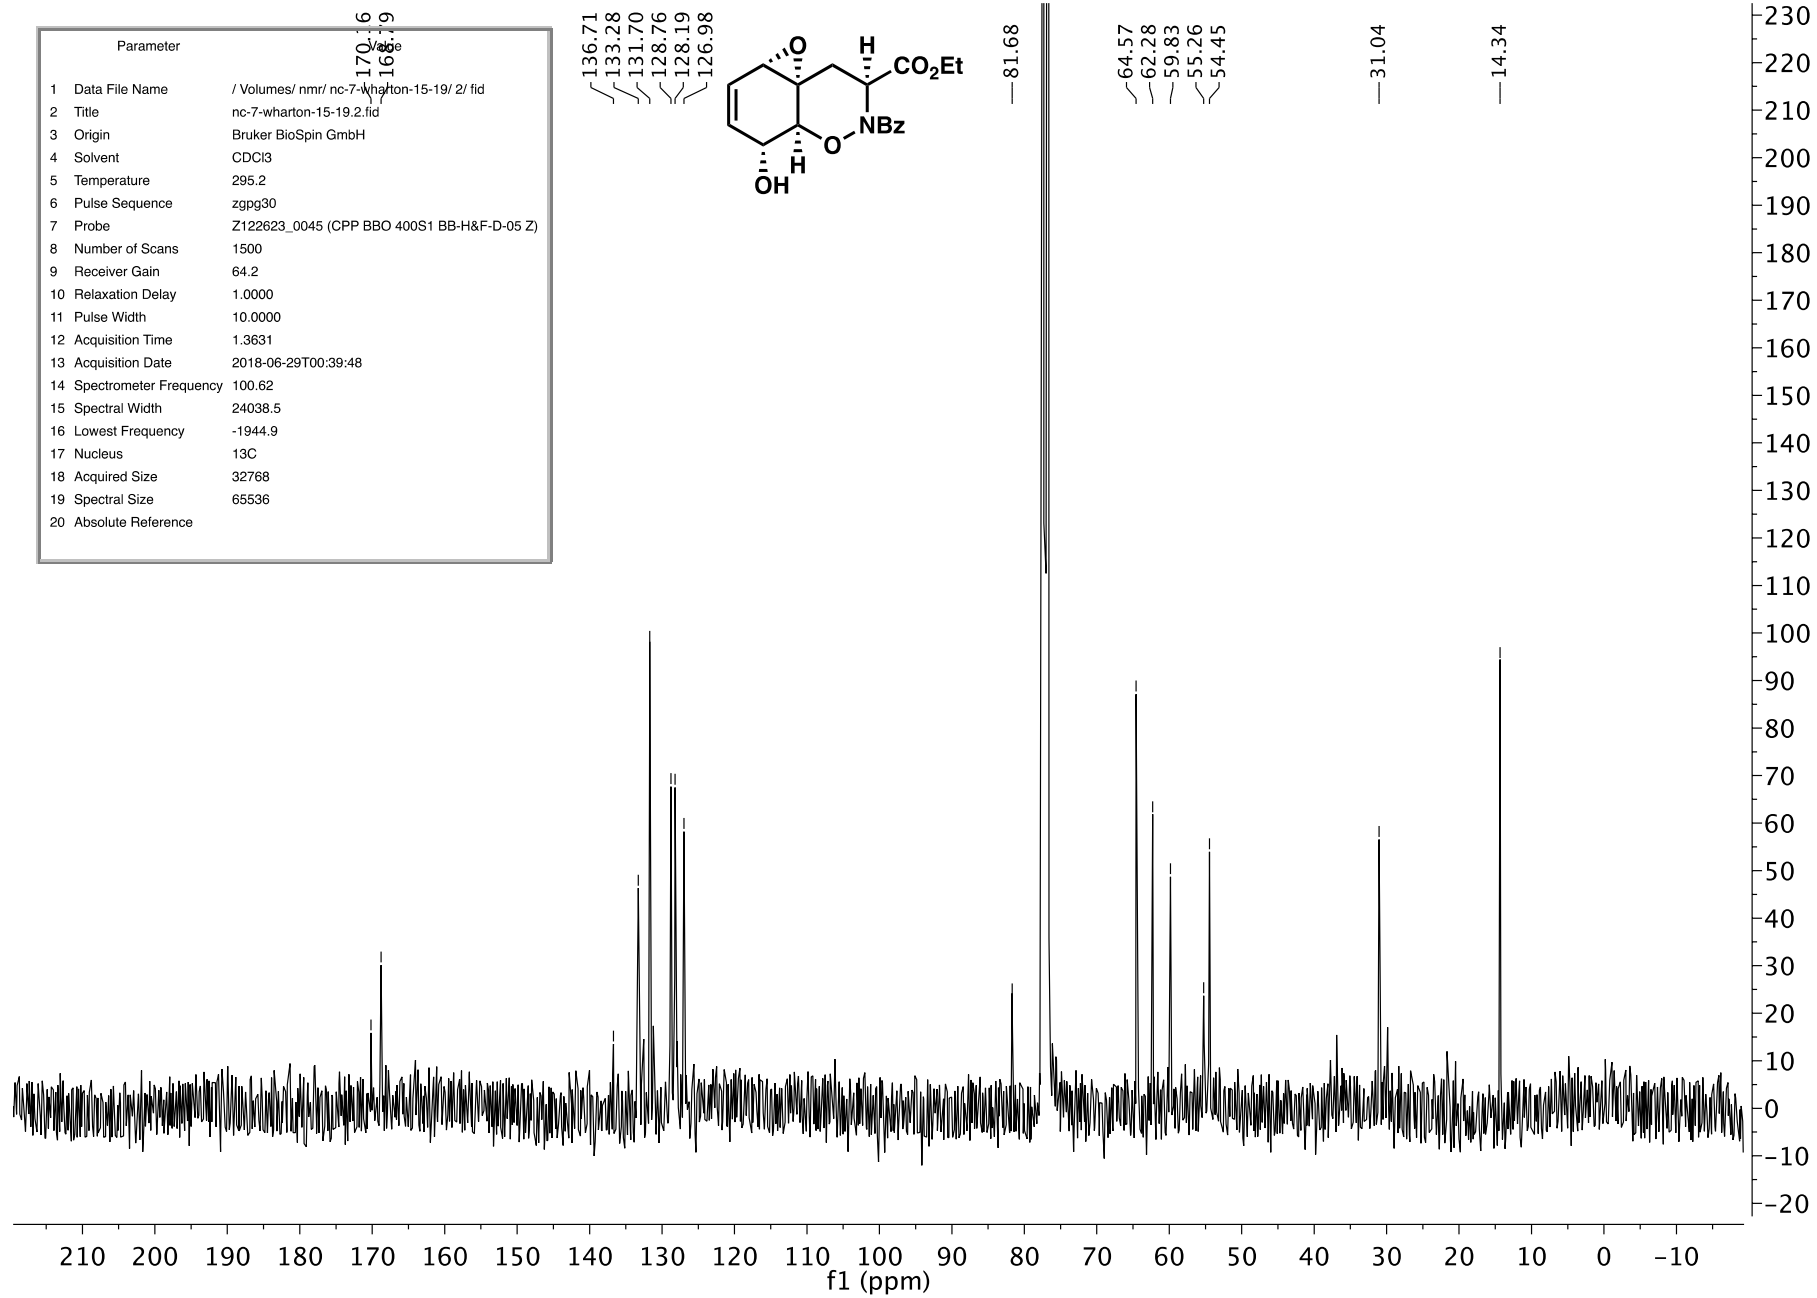





| Parameter                 | Value                                      |
|---------------------------|--------------------------------------------|
| 1 Data File Name          | /Volumes/nmr/nc-6-192-15-11/1/fid          |
| 2 Title                   | nc-6-192-15-11.1.fid                       |
| 3 Origin                  | Bruker BioSpin GmbH                        |
| 4 Solvent                 | CDCl3                                      |
| 5 Temperature             | 294.9                                      |
| 6 Pulse Sequence          | zg30                                       |
| 7 Probe                   | Z122623_0045 (CPP BBO 400S1 BB-H&F-D-05 Z) |
| 8 Number of Scans         | 16                                         |
| 9 Receiver Gain           | 197.4                                      |
| 10 Relaxation Delay       | 1.0000                                     |
| 11 Pulse Width            | 11.7000                                    |
| 12 Acquisition Time       | 4.0894                                     |
| 13 Acquisition Date       | 2017-07-31T16:59:43                        |
| 14 Spectrometer Frequency | 400.13                                     |
| 15 Spectral Width         | 8012.8                                     |
| 16 Lowest Frequency       | -1545.6                                    |
| 17 Nucleus                | 1H                                         |
| 18 Acquired Size          | 32768                                      |
| 19 Spectral Size          | 65536                                      |

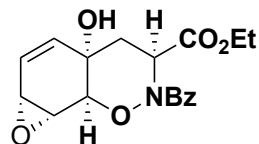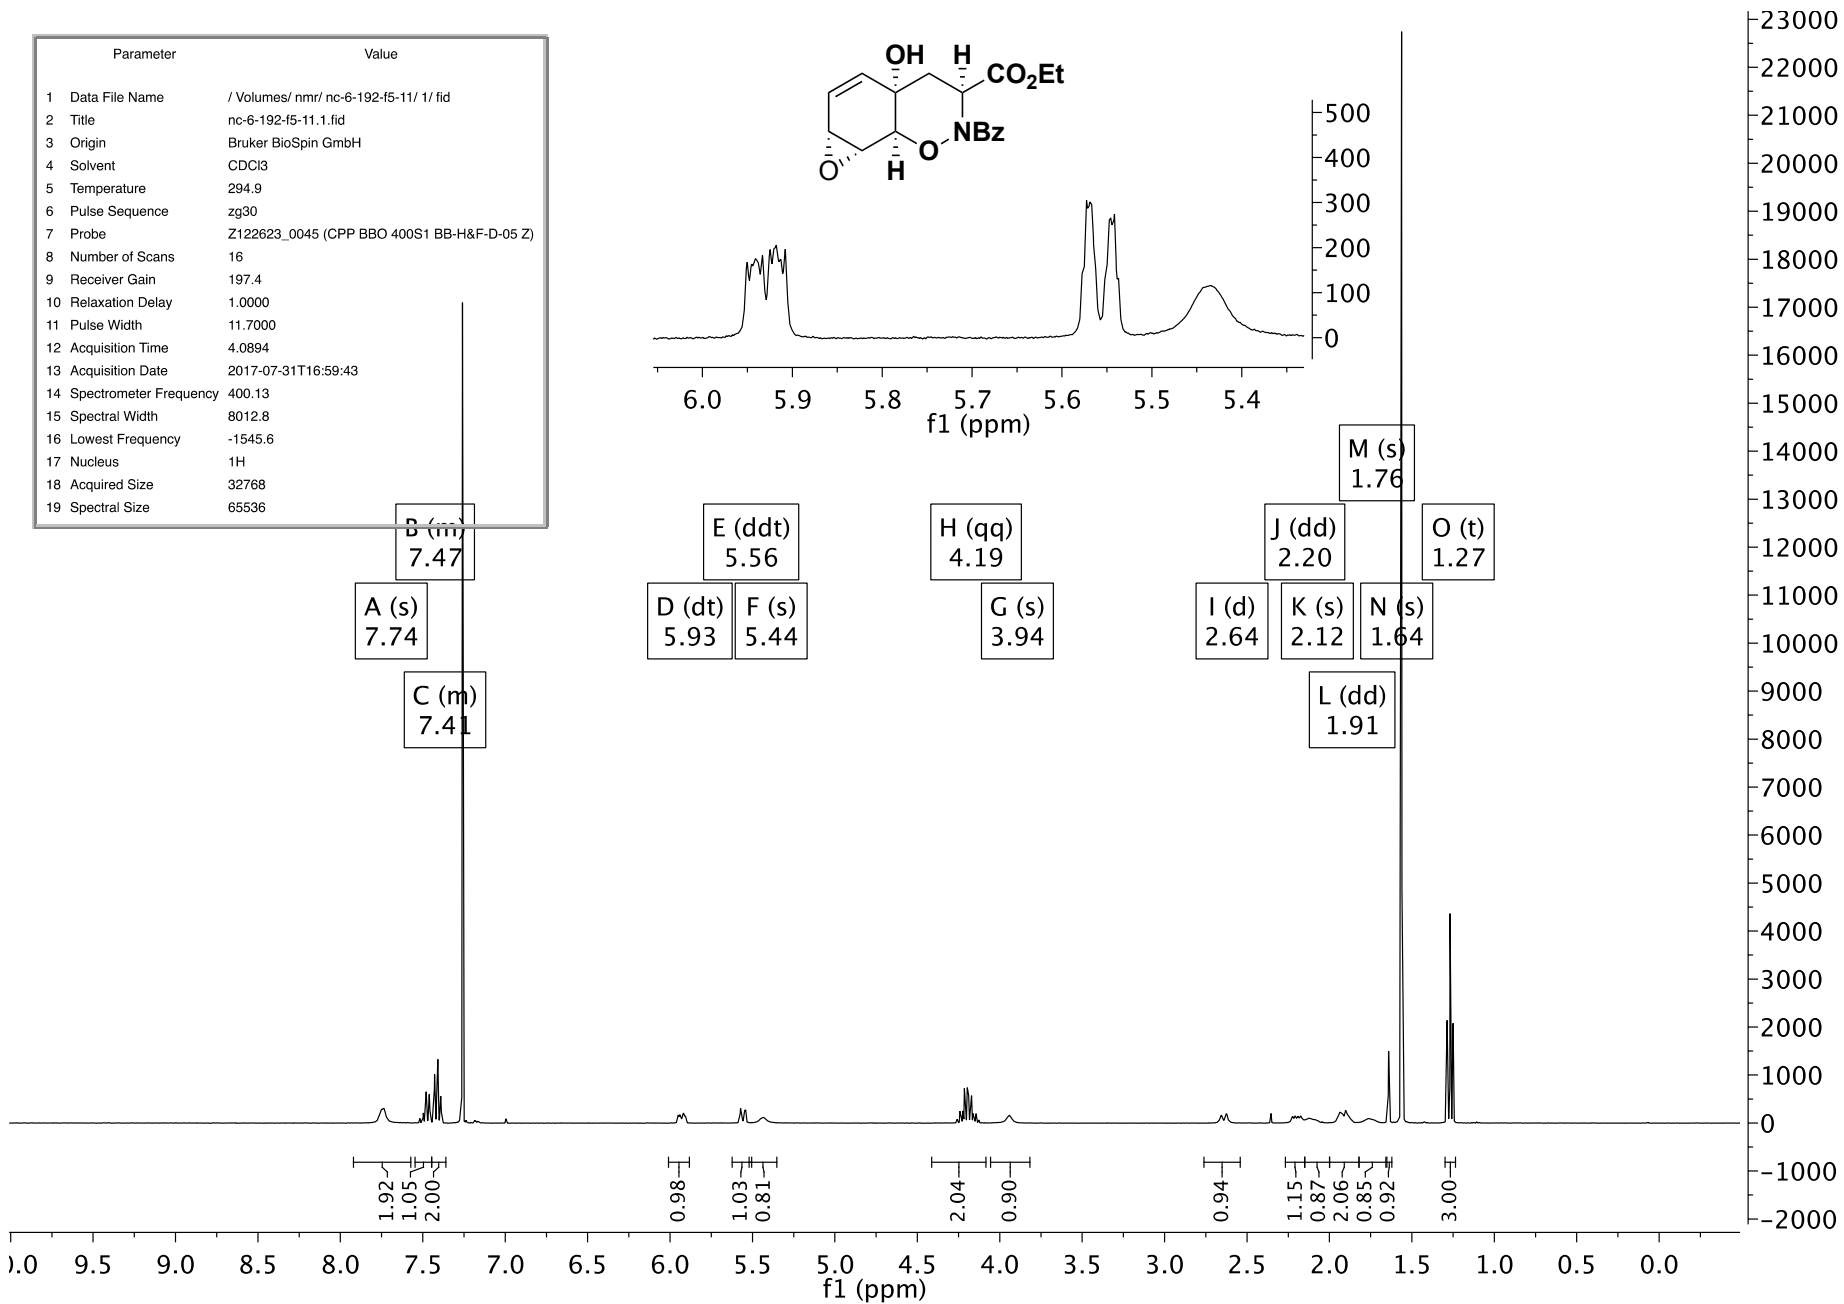

| Parameter                 | Value                                      |
|---------------------------|--------------------------------------------|
| 1 Data File Name          | /Volumes/nmr/nc-5-197-f17-35-h/1/fid       |
| 2 Title                   | nc-5-197-f17-35-h.1.fid                    |
| 3 Origin                  | Bruker BioSpin GmbH                        |
| 4 Solvent                 | CDCl3                                      |
| 5 Temperature             | 294.9                                      |
| 6 Pulse Sequence          | zg30                                       |
| 7 Probe                   | Z122623_0045 (CPP BBO 400S1 BB-H&F-D-05 Z) |
| 8 Number of Scans         | 16                                         |
| 9 Receiver Gain           | 176.8                                      |
| 10 Relaxation Delay       | 1.0000                                     |
| 11 Pulse Width            | 11.7000                                    |
| 12 Acquisition Time       | 4.0894                                     |
| 13 Acquisition Date       | 2016-12-16T17:11:45                        |
| 14 Spectrometer Frequency | 400.13                                     |
| 15 Spectral Width         | 8012.8                                     |
| 16 Lowest Frequency       | -1579.4                                    |
| 17 Nucleus                | 1H                                         |
| 18 Acquired Size          | 32768                                      |
| 19 Spectral Size          | 65536                                      |
| 20 Absolute Reference     |                                            |

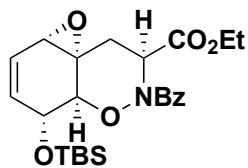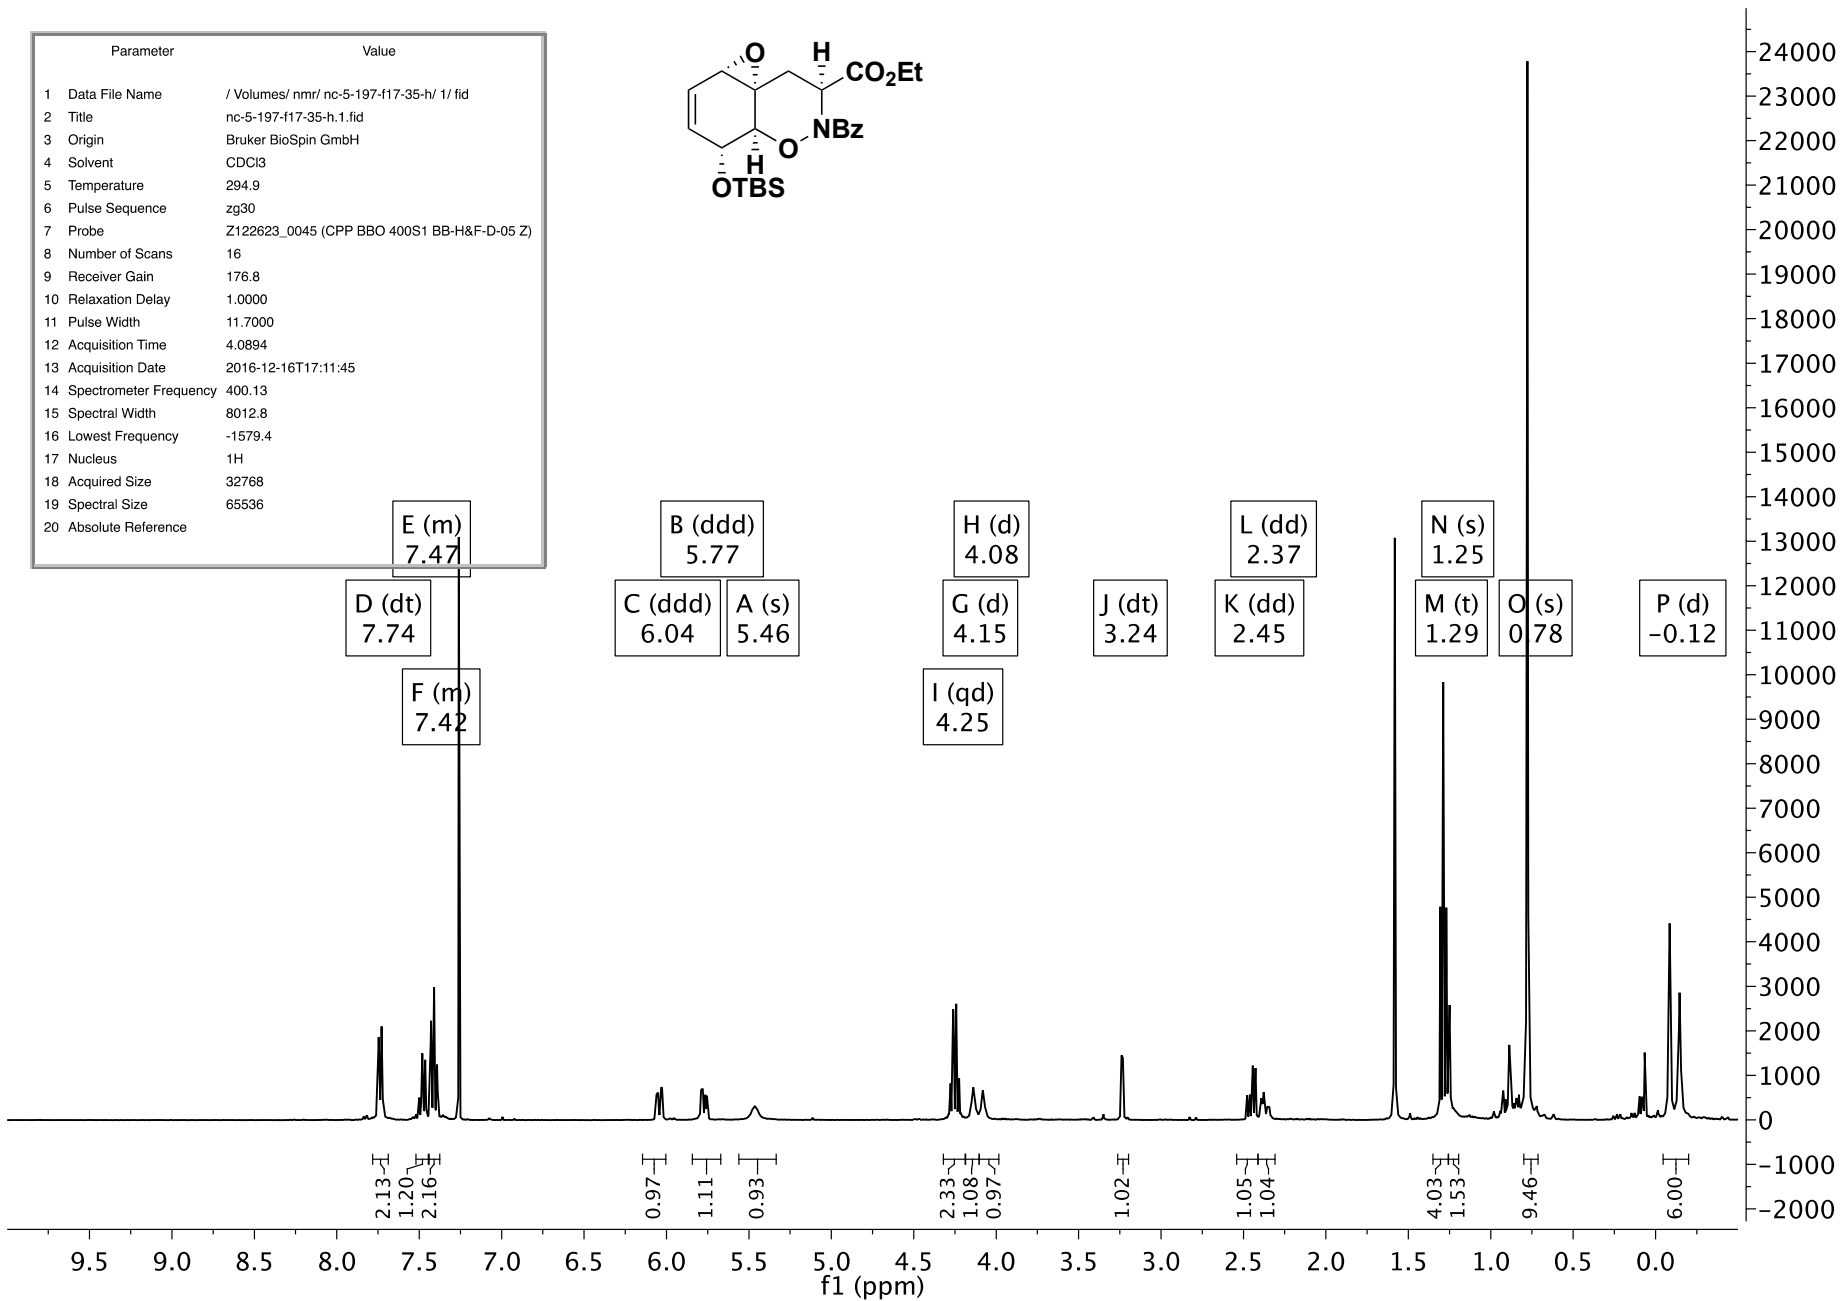

| Parameter                 | Value                                      |
|---------------------------|--------------------------------------------|
| 1 Data File Name          | /Volumes/nmr/nc-5-197-f17-35/1/fid         |
| 2 Title                   | nc-5-197-f17-35.1.fid                      |
| 3 Origin                  | Bruker BioSpin GmbH                        |
| 4 Solvent                 | CDCl3                                      |
| 5 Temperature             | 294.9                                      |
| 6 Pulse Sequence          | zgpg30                                     |
| 7 Probe                   | Z122623_0045 (CPP BBO 400S1 BB-H&F-D-05 Z) |
| 8 Number of Scans         | 1024                                       |
| 9 Receiver Gain           | 72.0                                       |
| 10 Relaxation Delay       | 2.0000                                     |
| 11 Pulse Width            | 10.0000                                    |
| 12 Acquisition Time       | 1.3631                                     |
| 13 Acquisition Date       | 2016-12-15T16:36:28                        |
| 14 Spectrometer Frequency | 100.62                                     |
| 15 Spectral Width         | 24038.5                                    |
| 16 Lowest Frequency       | -1932.3                                    |
| 17 Nucleus                | 13C                                        |
| 18 Acquired Size          | 32768                                      |
| 19 Spectral Size          | 65536                                      |
| 20 Absolute Reference     |                                            |

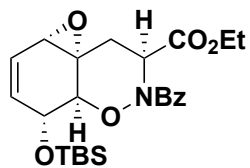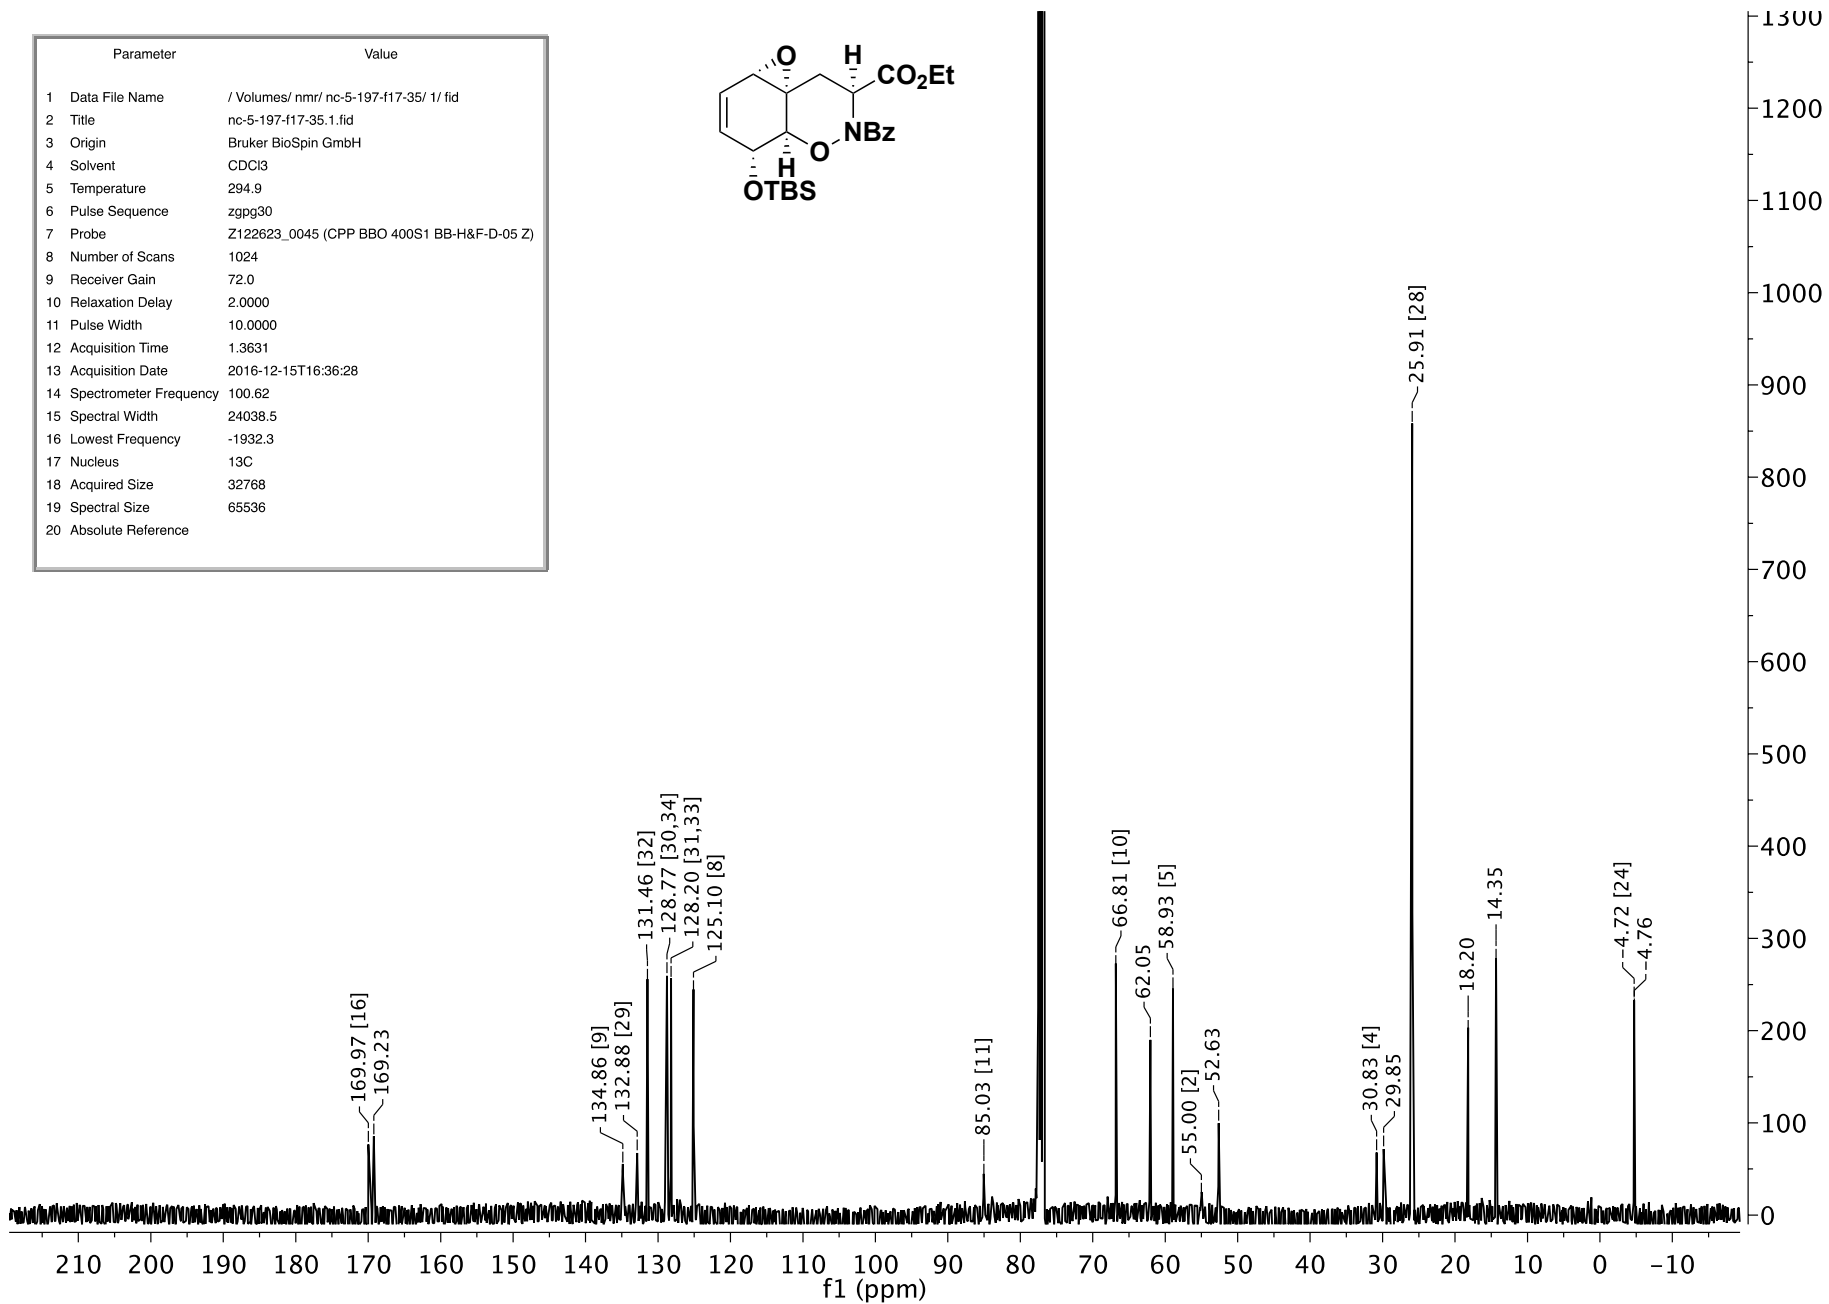

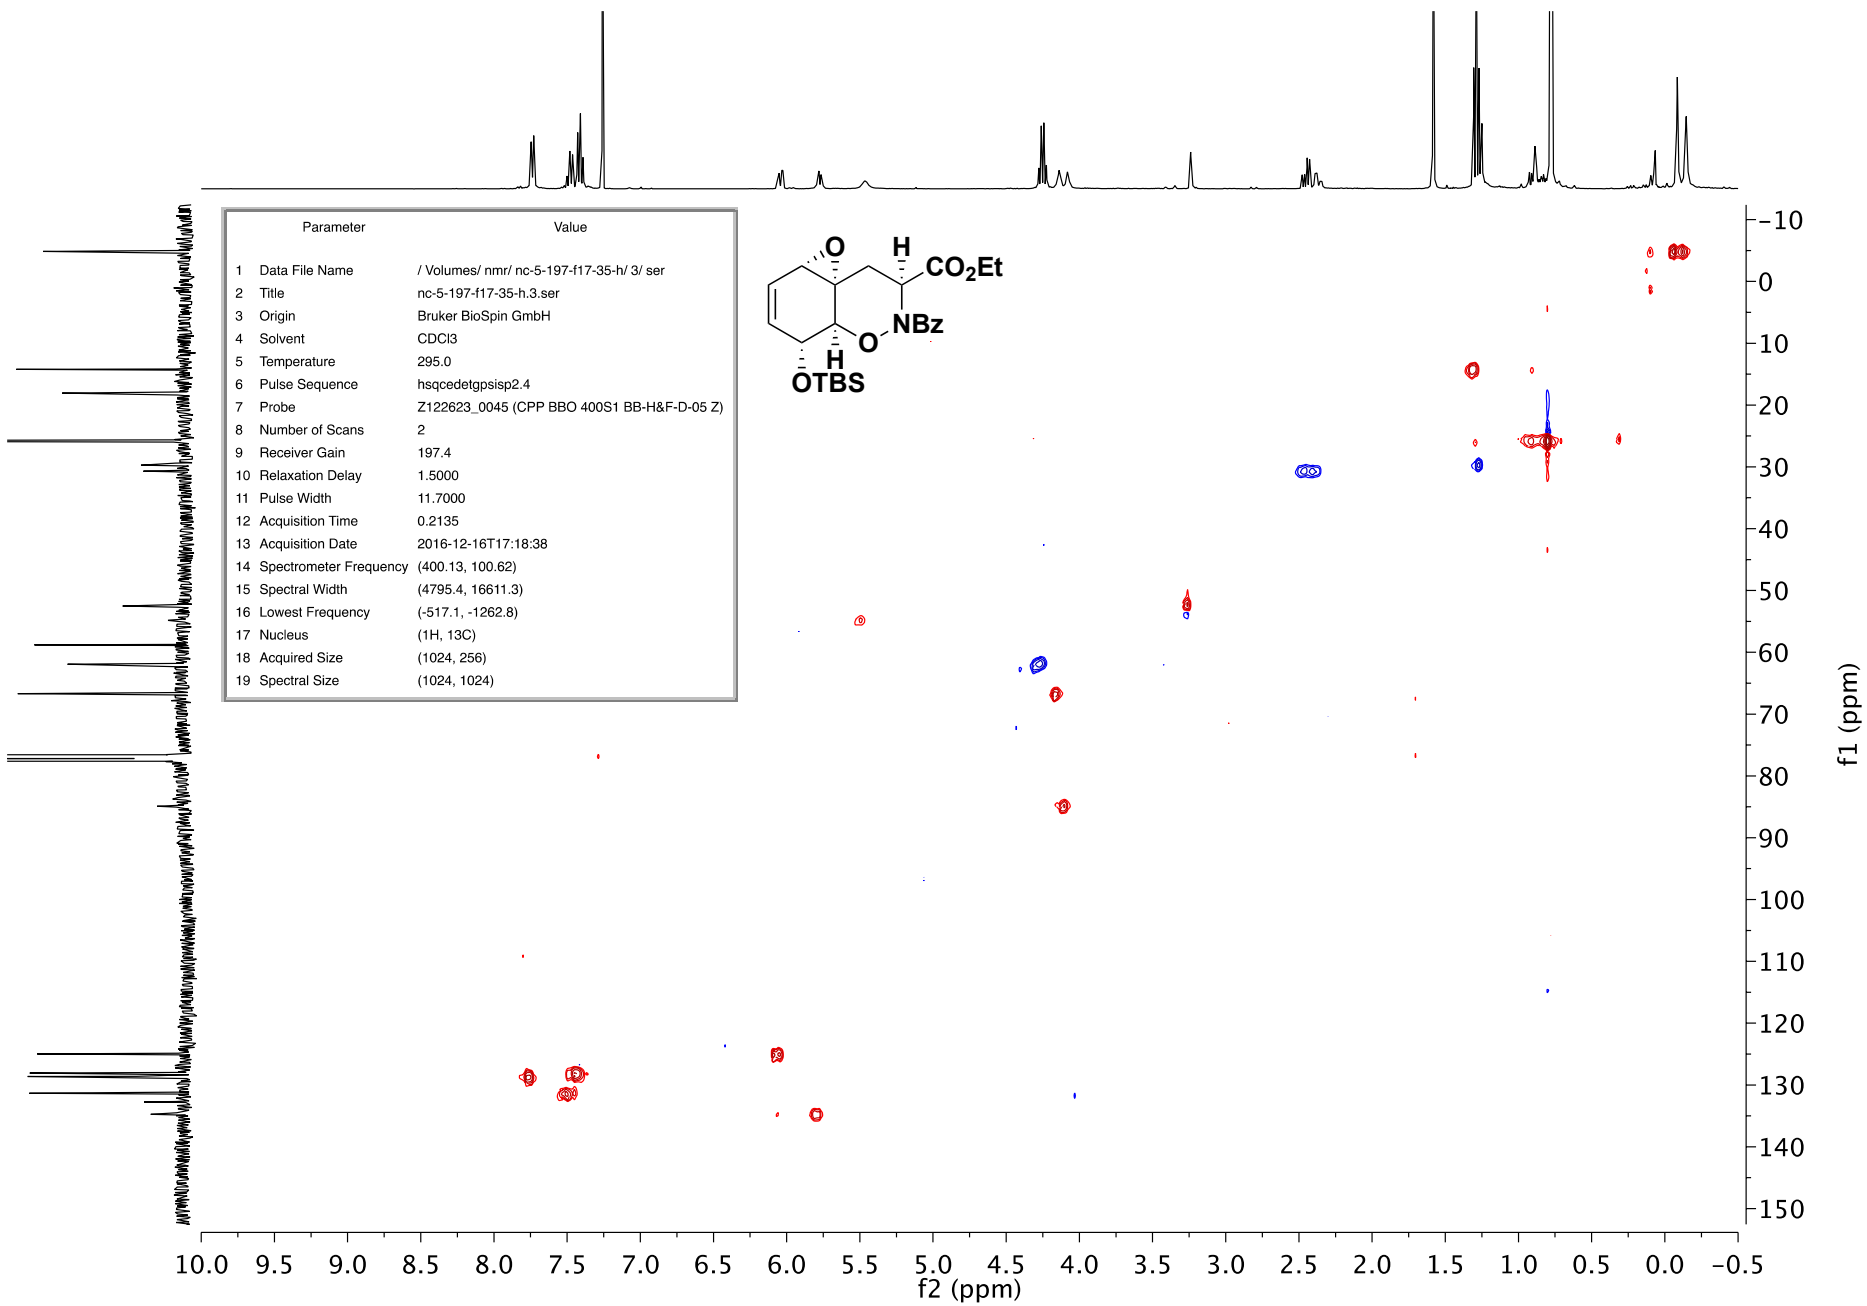

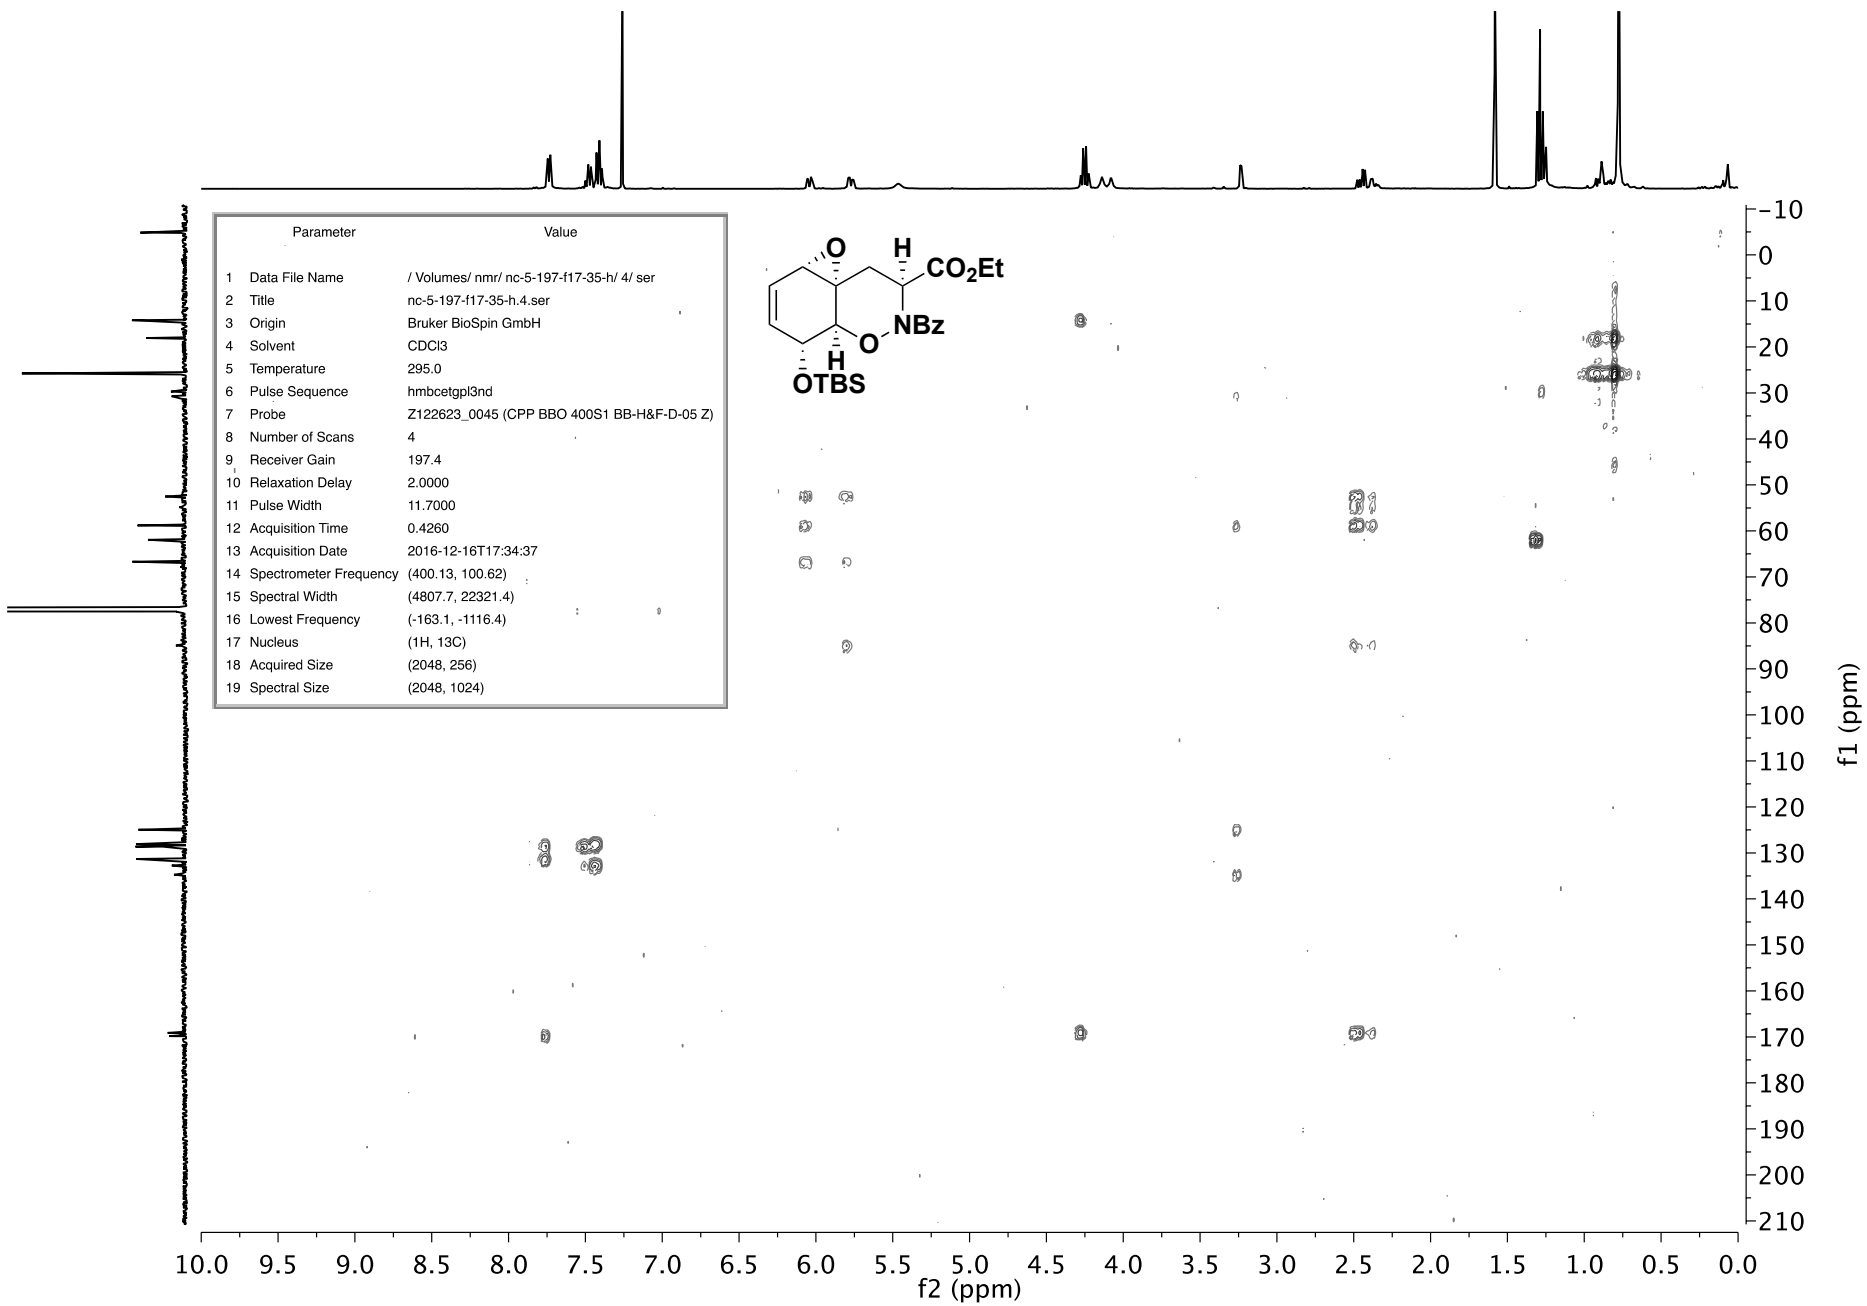

| Parameter                 | Value                                      |
|---------------------------|--------------------------------------------|
| 1 Data File Name          | / Volumes/ nmr/ nc-5-197-f17-35-h/ 4/ ser  |
| 2 Title                   | nc-5-197-f17-35-h.4.ser                    |
| 3 Origin                  | Bruker BioSpin GmbH                        |
| 4 Solvent                 | $\text{CDCl}_3$                            |
| 5 Temperature             | 295.0                                      |
| 6 Pulse Sequence          | hmbcetgp3nd                                |
| 7 Probe                   | Z122623_0045 (CPP BBO 400S1 BB-H&F-D-05 Z) |
| 8 Number of Scans         | 4                                          |
| 9 Receiver Gain           | 197.4                                      |
| 10 Relaxation Delay       | 2.0000                                     |
| 11 Pulse Width            | 11.7000                                    |
| 12 Acquisition Time       | 0.4260                                     |
| 13 Acquisition Date       | 2016-12-16T17:34:37                        |
| 14 Spectrometer Frequency | (400.13, 100.62)                           |
| 15 Spectral Width         | (4807.7, 22321.4)                          |
| 16 Lowest Frequency       | (-163.1, -1116.4)                          |
| 17 Nucleus                | ( $^1\text{H}$ , $^{13}\text{C}$ )         |
| 18 Acquired Size          | (2048, 256)                                |
| 19 Spectral Size          | (2048, 1024)                               |

| Parameter                 | Value                                               |
|---------------------------|-----------------------------------------------------|
| 1 Data File Name          | /Volumes/nmrdata/ncowper/nmr/nc-5-198-19-14-h/1/fid |
| 2 Title                   | nc-5-198-19-14-h.1.fid                              |
| 3 Origin                  | Bruker BioSpin GmbH                                 |
| 4 Solvent                 | CDCl3                                               |
| 5 Temperature             | 294.9                                               |
| 6 Pulse Sequence          | zg30                                                |
| 7 Probe                   | Z122623_0045 (CPP BBO 400S1 BB-H&F-D-05 Z)          |
| 8 Number of Scans         | 16                                                  |
| 9 Receiver Gain           | 197.4                                               |
| 10 Relaxation Delay       | 1.0000                                              |
| 11 Pulse Width            | 11.7000                                             |
| 12 Acquisition Time       | 4.0894                                              |
| 13 Acquisition Date       | 2016-12-19T02:26:37                                 |
| 14 Spectrometer Frequency | 400.13                                              |
| 15 Spectral Width         | 8012.8                                              |
| 16 Lowest Frequency       | -1545.3                                             |
| 17 Nucleus                | 1H                                                  |
| 18 Acquired Size          | 32768                                               |
| 19 Spectral Size          | 65536                                               |
| 20 Absolute Reference     |                                                     |

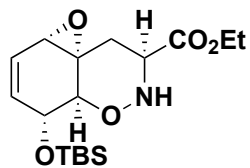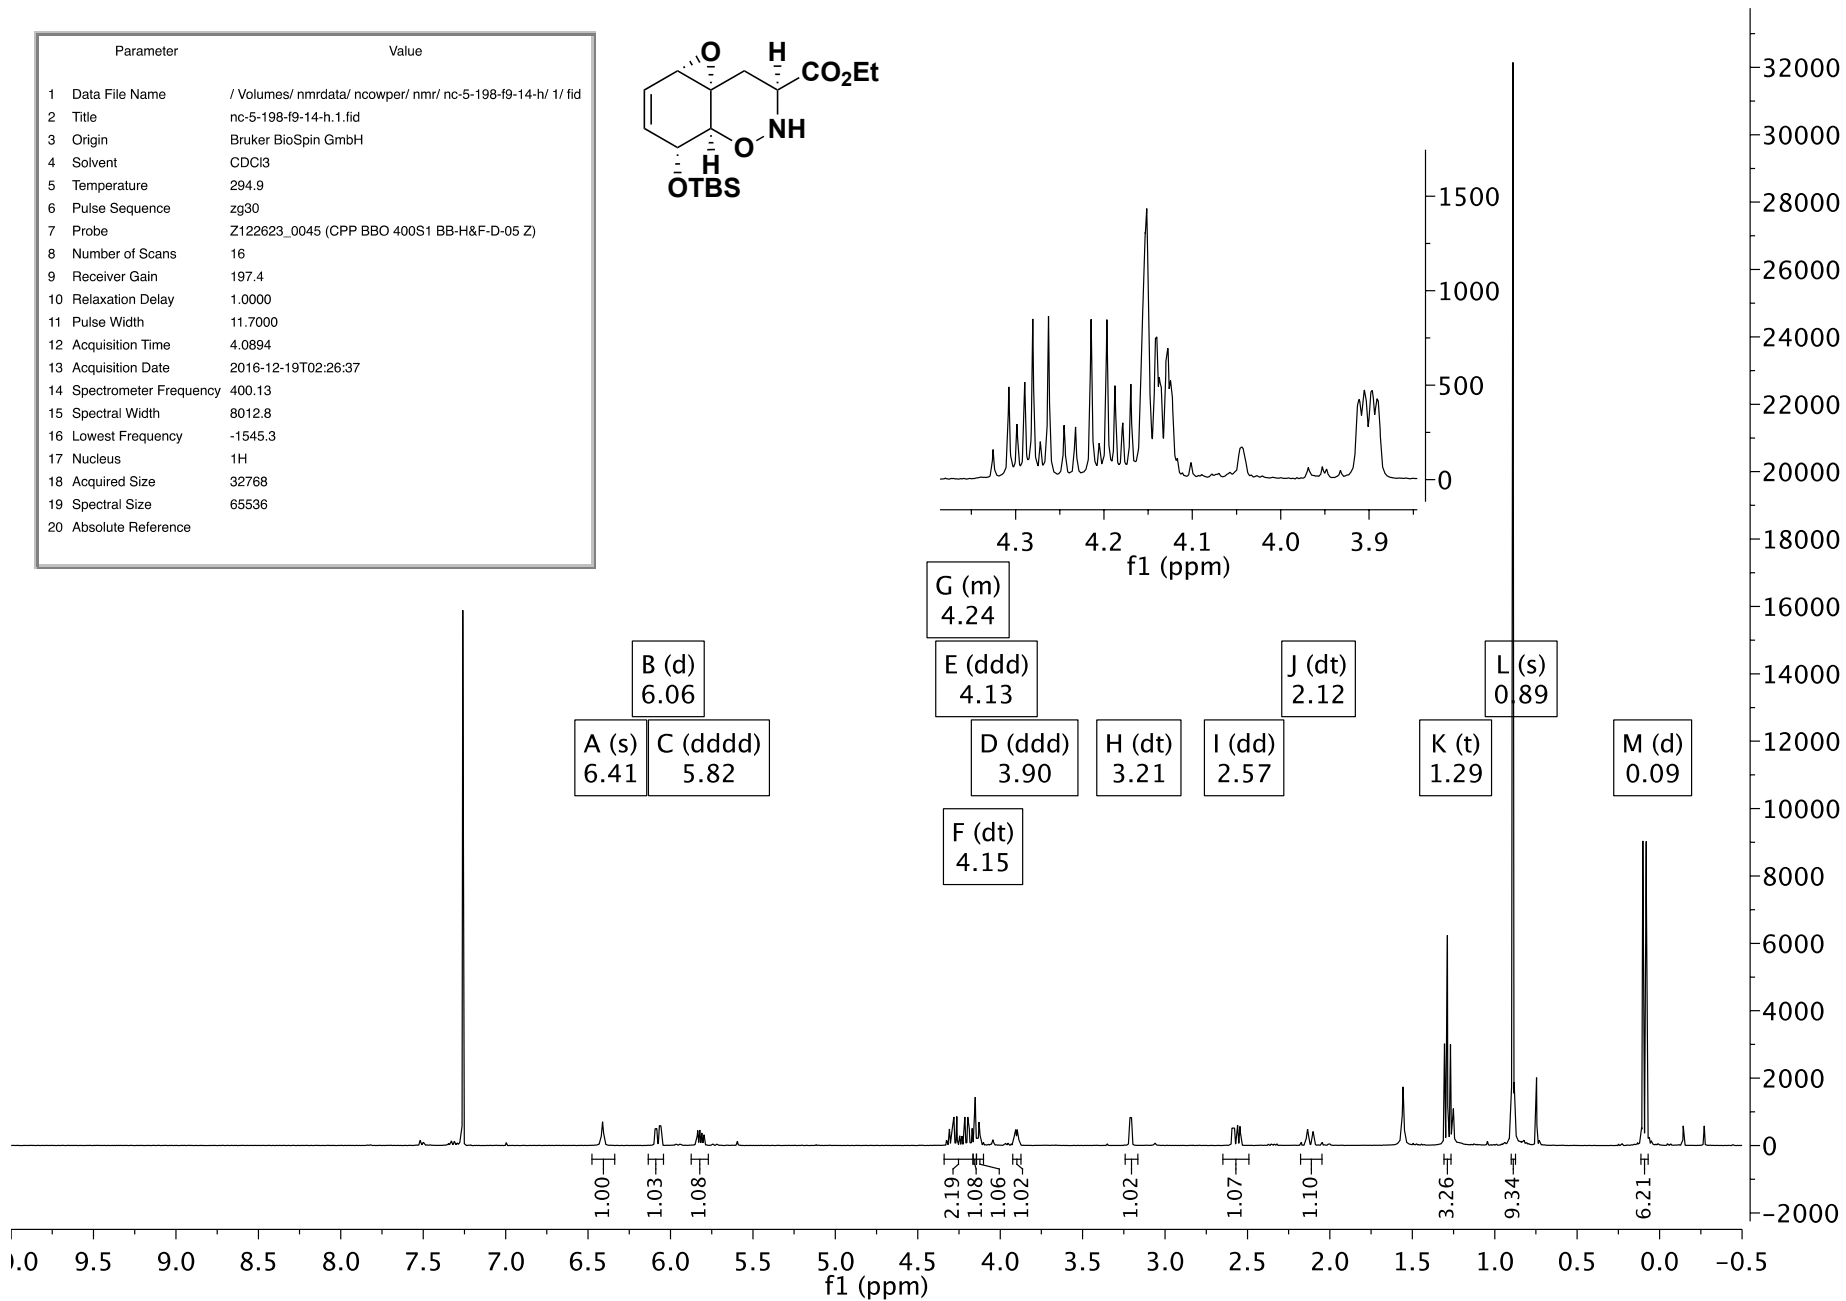

| Parameter                 | Value                                                      |
|---------------------------|------------------------------------------------------------|
| 1 Data File Name          | / Volumes/ nmrdata/ ncowper/ nmr/ nc-5-198-19-14-h/ 2/ ser |
| 2 Title                   | nc-5-198-19-14-h.2.ser                                     |
| 3 Origin                  | Bruker BioSpin GmbH                                        |
| 4 Solvent                 | CDCl3                                                      |
| 5 Temperature             | 294.9                                                      |
| 6 Pulse Sequence          | hsqcetgpcisp2.4                                            |
| 7 Probe                   | Z122623_0045 (CPP BBO 400S1 BB-H&F-D-05 Z)                 |
| 8 Number of Scans         | 2                                                          |
| 9 Receiver Gain           | 197.4                                                      |
| 10 Relaxation Delay       | 1.5000                                                     |
| 11 Pulse Width            | 11.7000                                                    |
| 12 Acquisition Time       | 0.2135                                                     |
| 13 Acquisition Date       | 2016-12-19T02:28:29                                        |
| 14 Spectrometer Frequency | (400.13, 100.62)                                           |
| 15 Spectral Width         | (4795.4, 16611.3)                                          |
| 16 Lowest Frequency       | (-530.7, -1262.8)                                          |
| 17 Nucleus                | (1H, 13C)                                                  |
| 18 Acquired Size          | (1024, 256)                                                |
| 19 Spectral Size          | (1024, 1024)                                               |

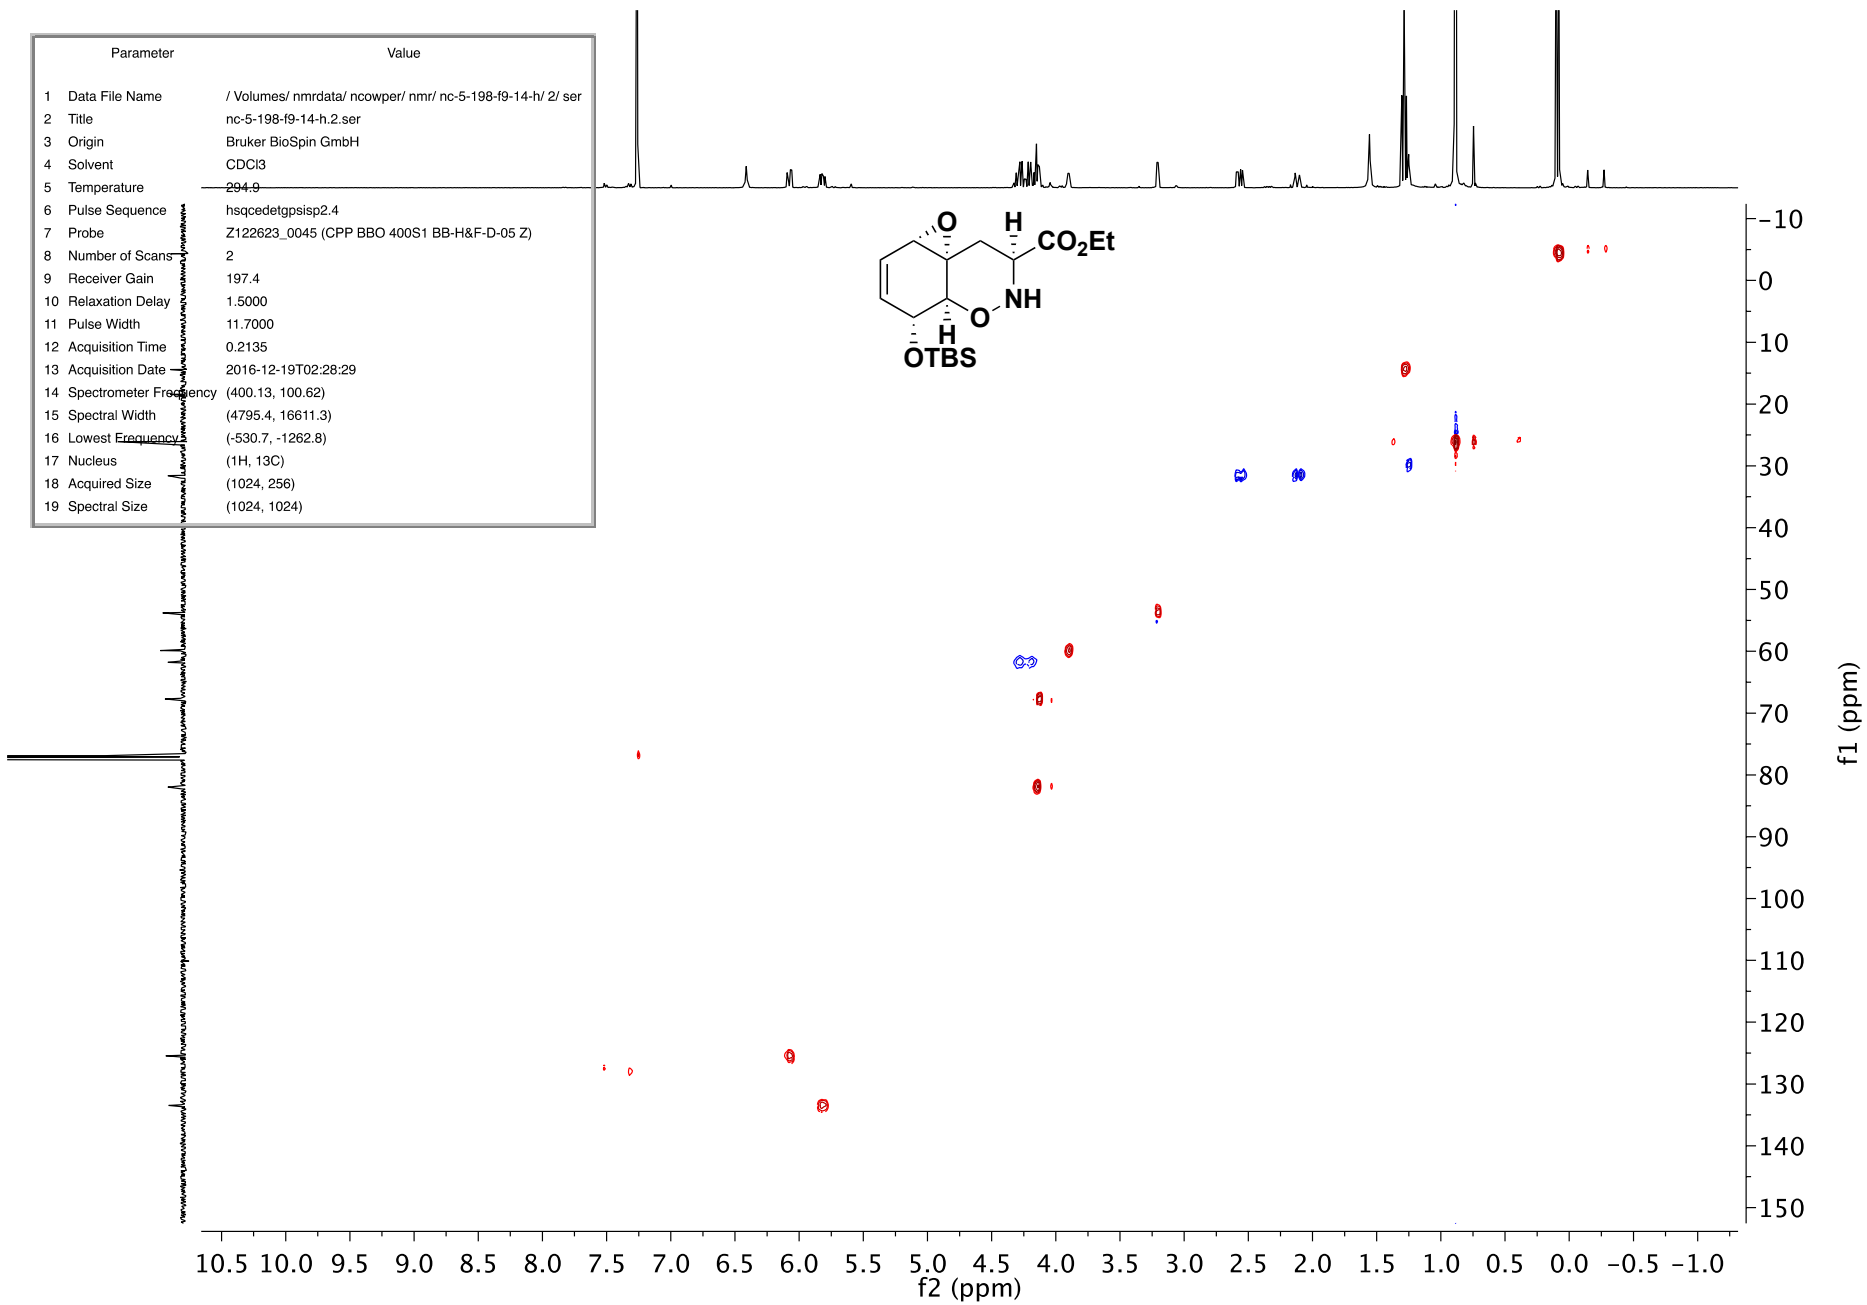





| Parameter                 | Value                                                    |
|---------------------------|----------------------------------------------------------|
| 1 Data File Name          | /Volumes/ data/ nc-7-western-fragment/ CARBON01.fid/ fid |
| 2 Title                   | CARBON01                                                 |
| 3 Origin                  | Varian                                                   |
| 4 Spectrometer            | inova                                                    |
| 5 Solvent                 | cdcl3                                                    |
| 6 Temperature             | 25.0                                                     |
| 7 Pulse Sequence          | s2pul                                                    |
| 8 Experiment              | 1D                                                       |
| 9 Probe                   | autox7991                                                |
| 10 Number of Scans        | 4288                                                     |
| 11 Receiver Gain          | 30                                                       |
| 12 Relaxation Delay       | 1.0000                                                   |
| 13 Pulse Width            | 4.6125                                                   |
| 14 Acquisition Date       | 2018-07-03T06:35:39                                      |
| 15 Spectrometer Frequency | 125.65                                                   |
| 16 Spectral Width         | 31446.5                                                  |
| 17 Lowest Frequency       | -1886.2                                                  |
| 18 Nucleus                | 13C                                                      |
| 19 Acquired Size          | 32768                                                    |
| 20 Spectral Size          | 65536                                                    |

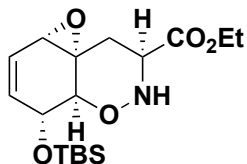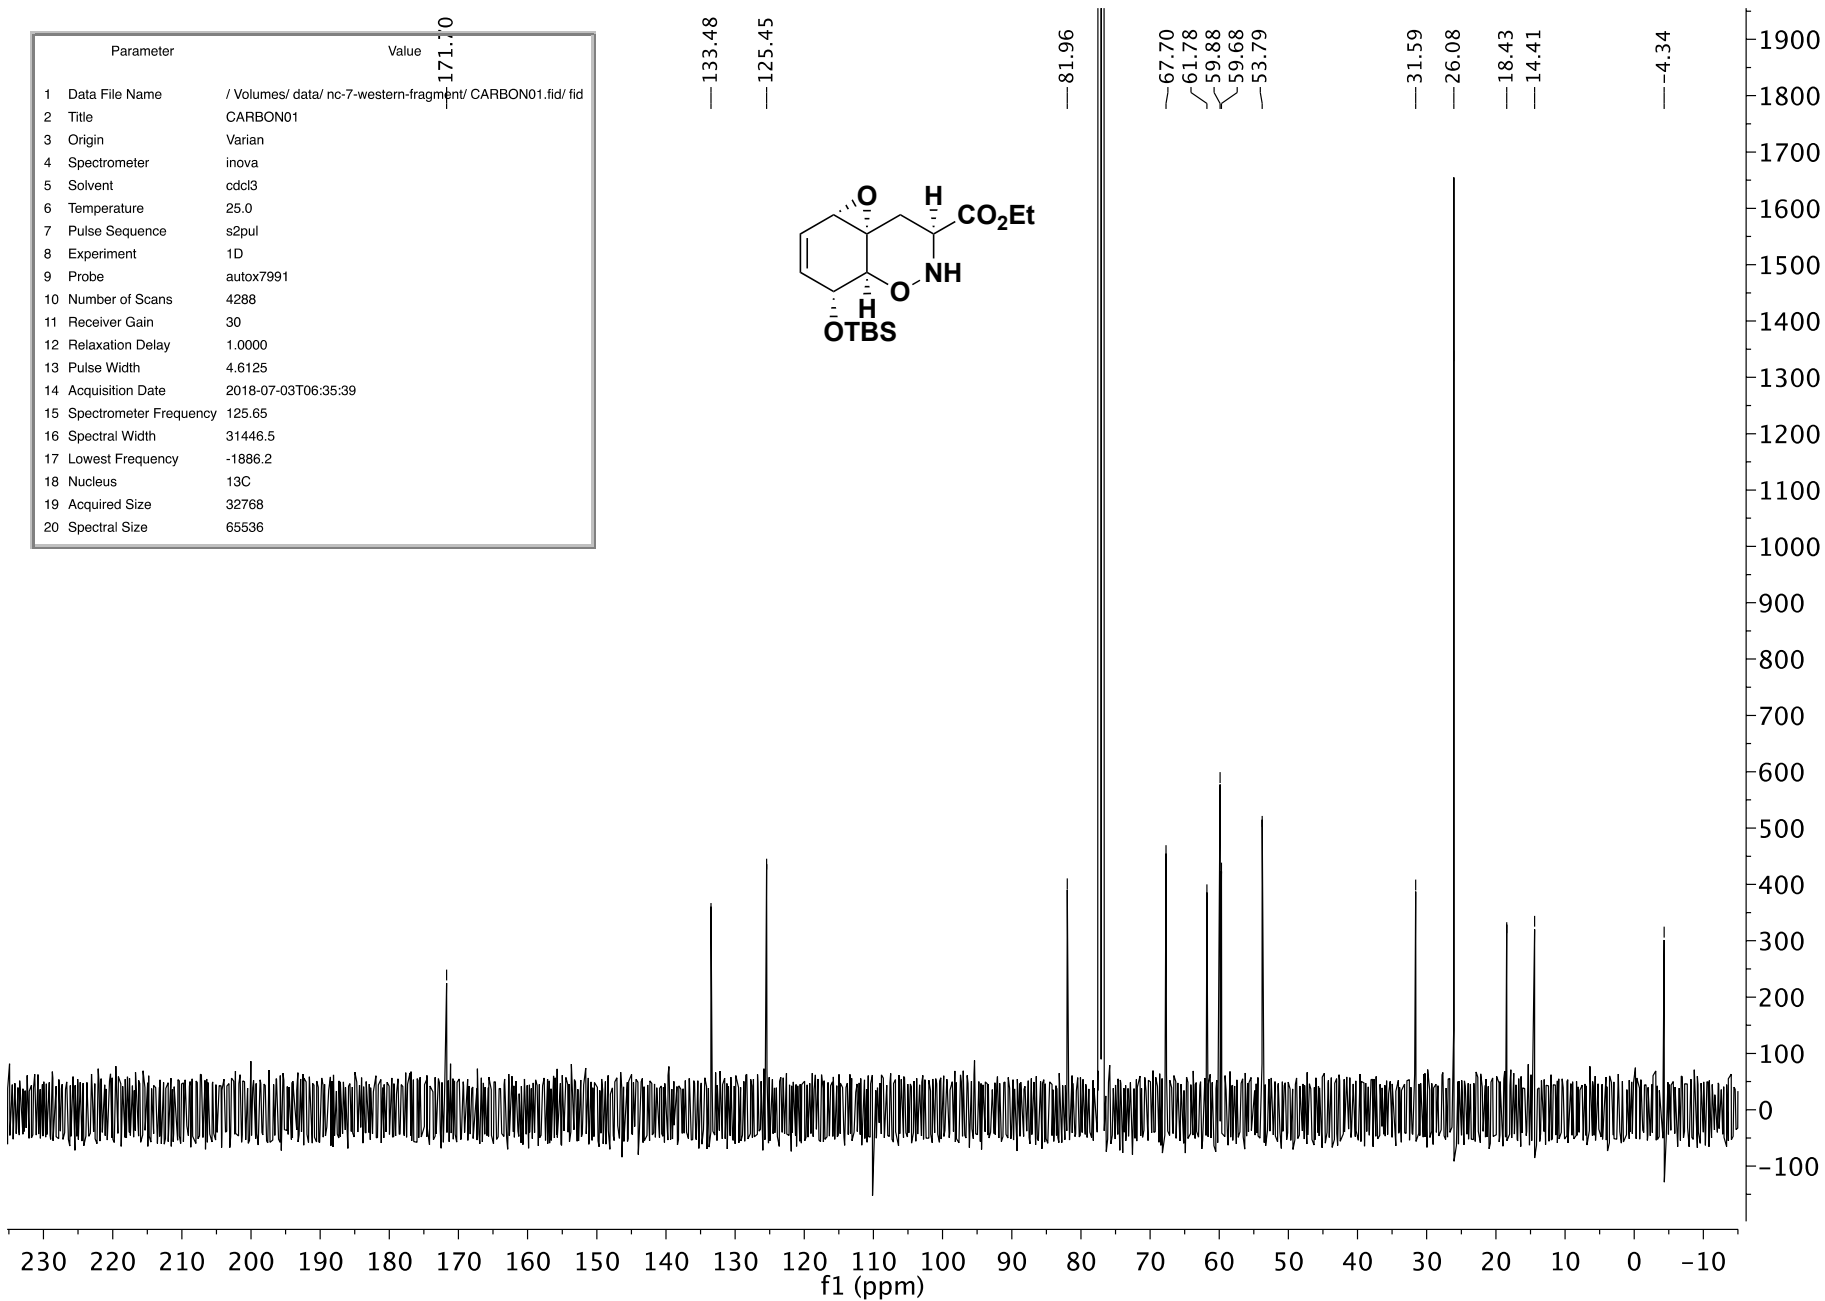

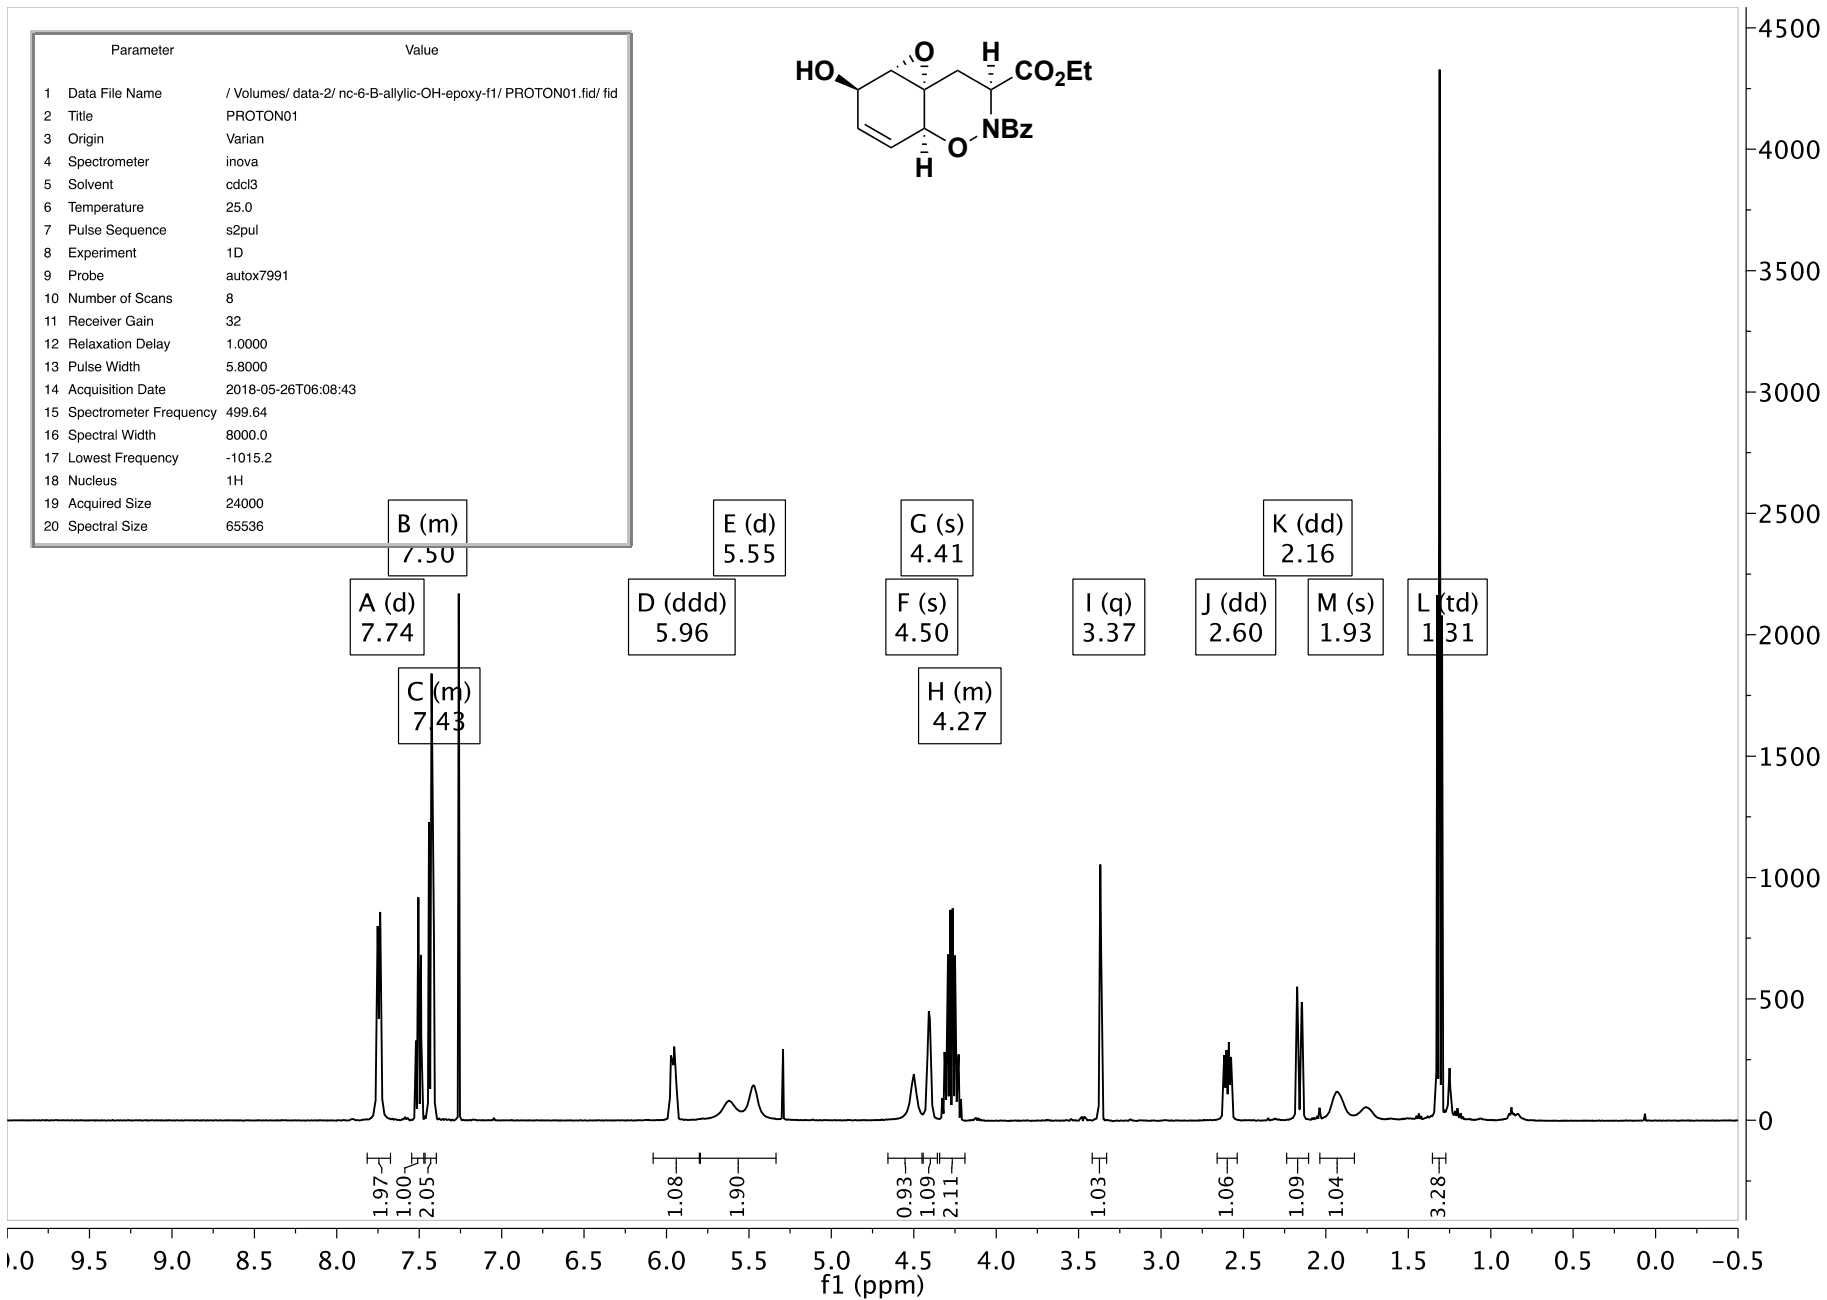

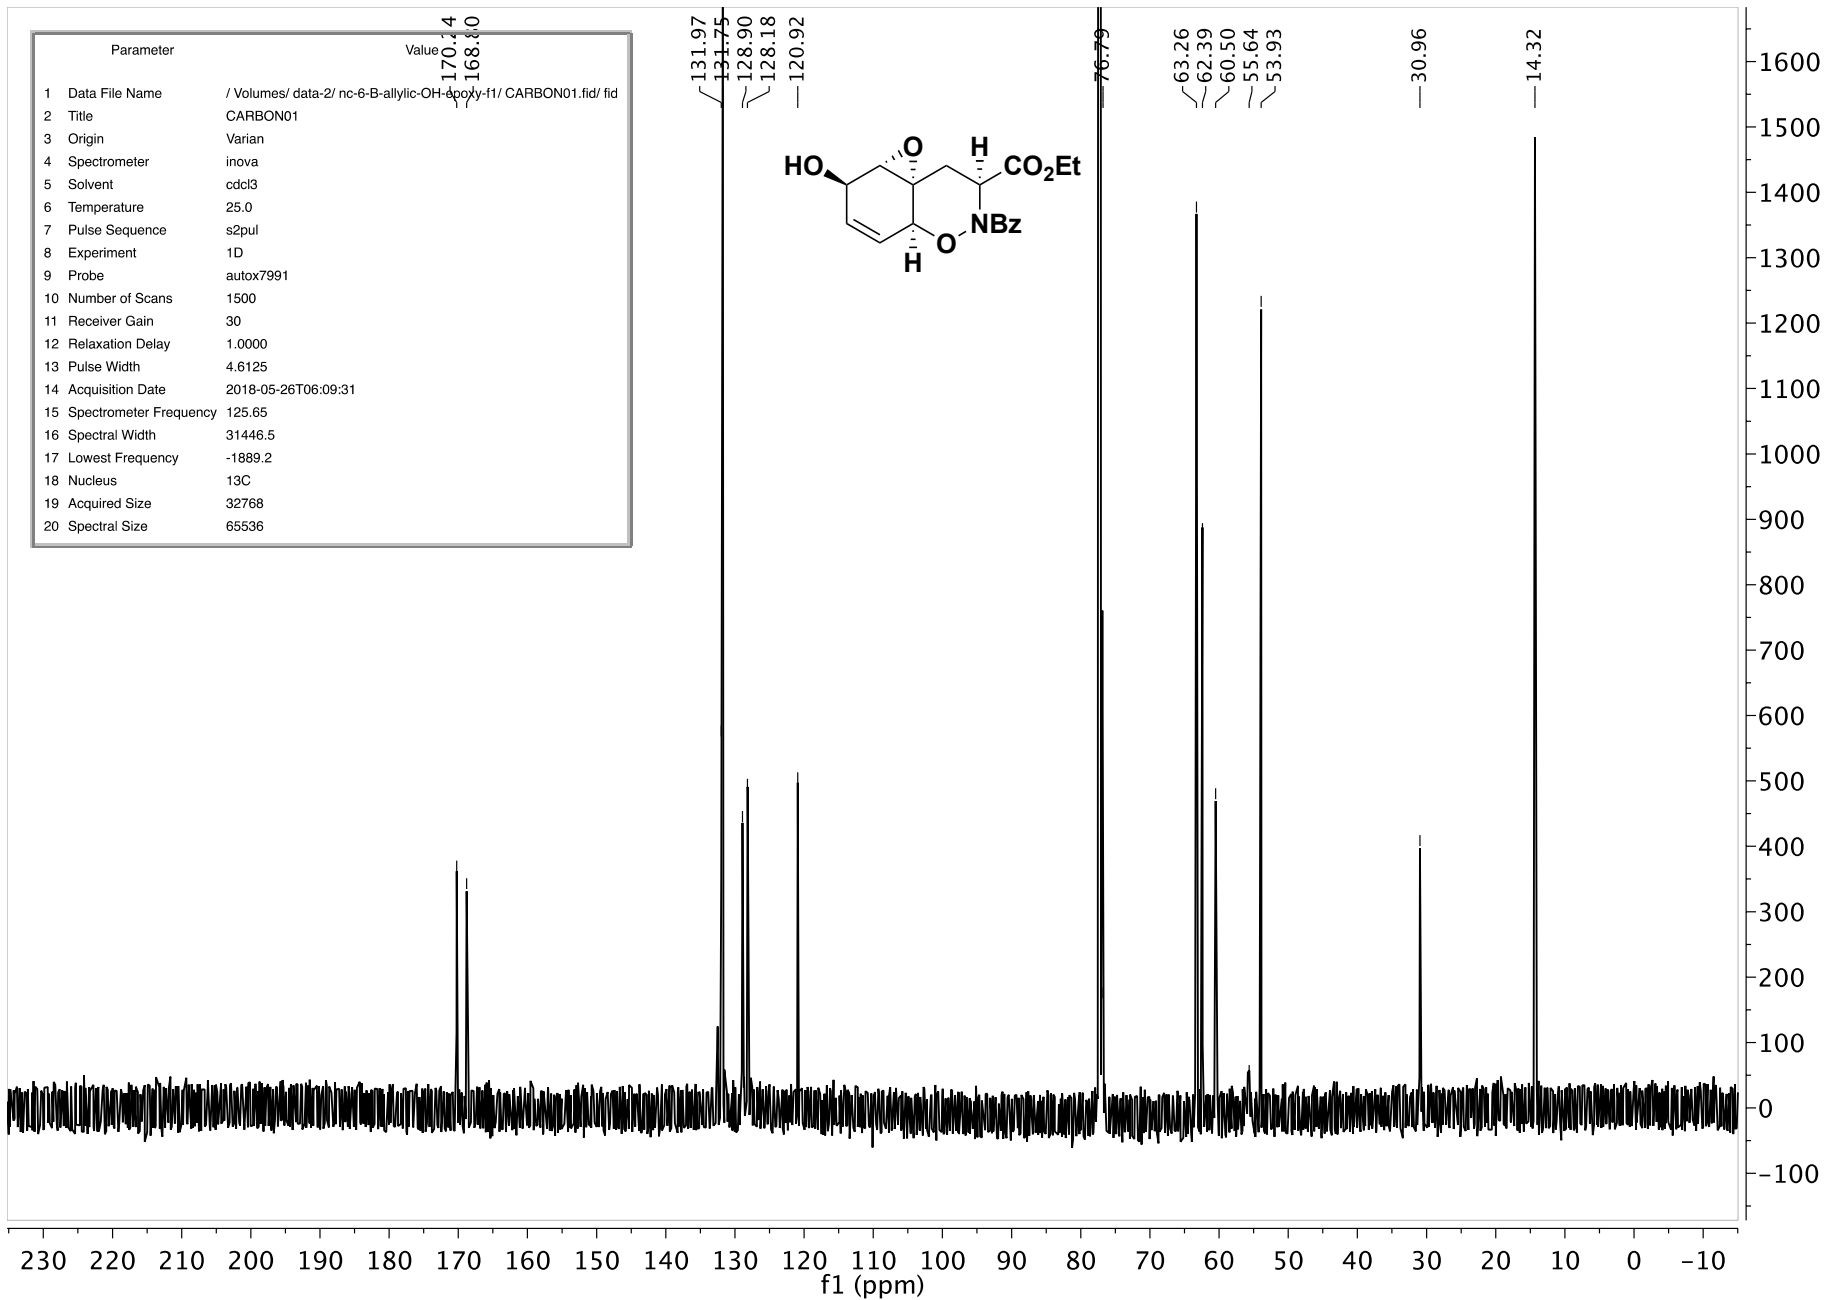

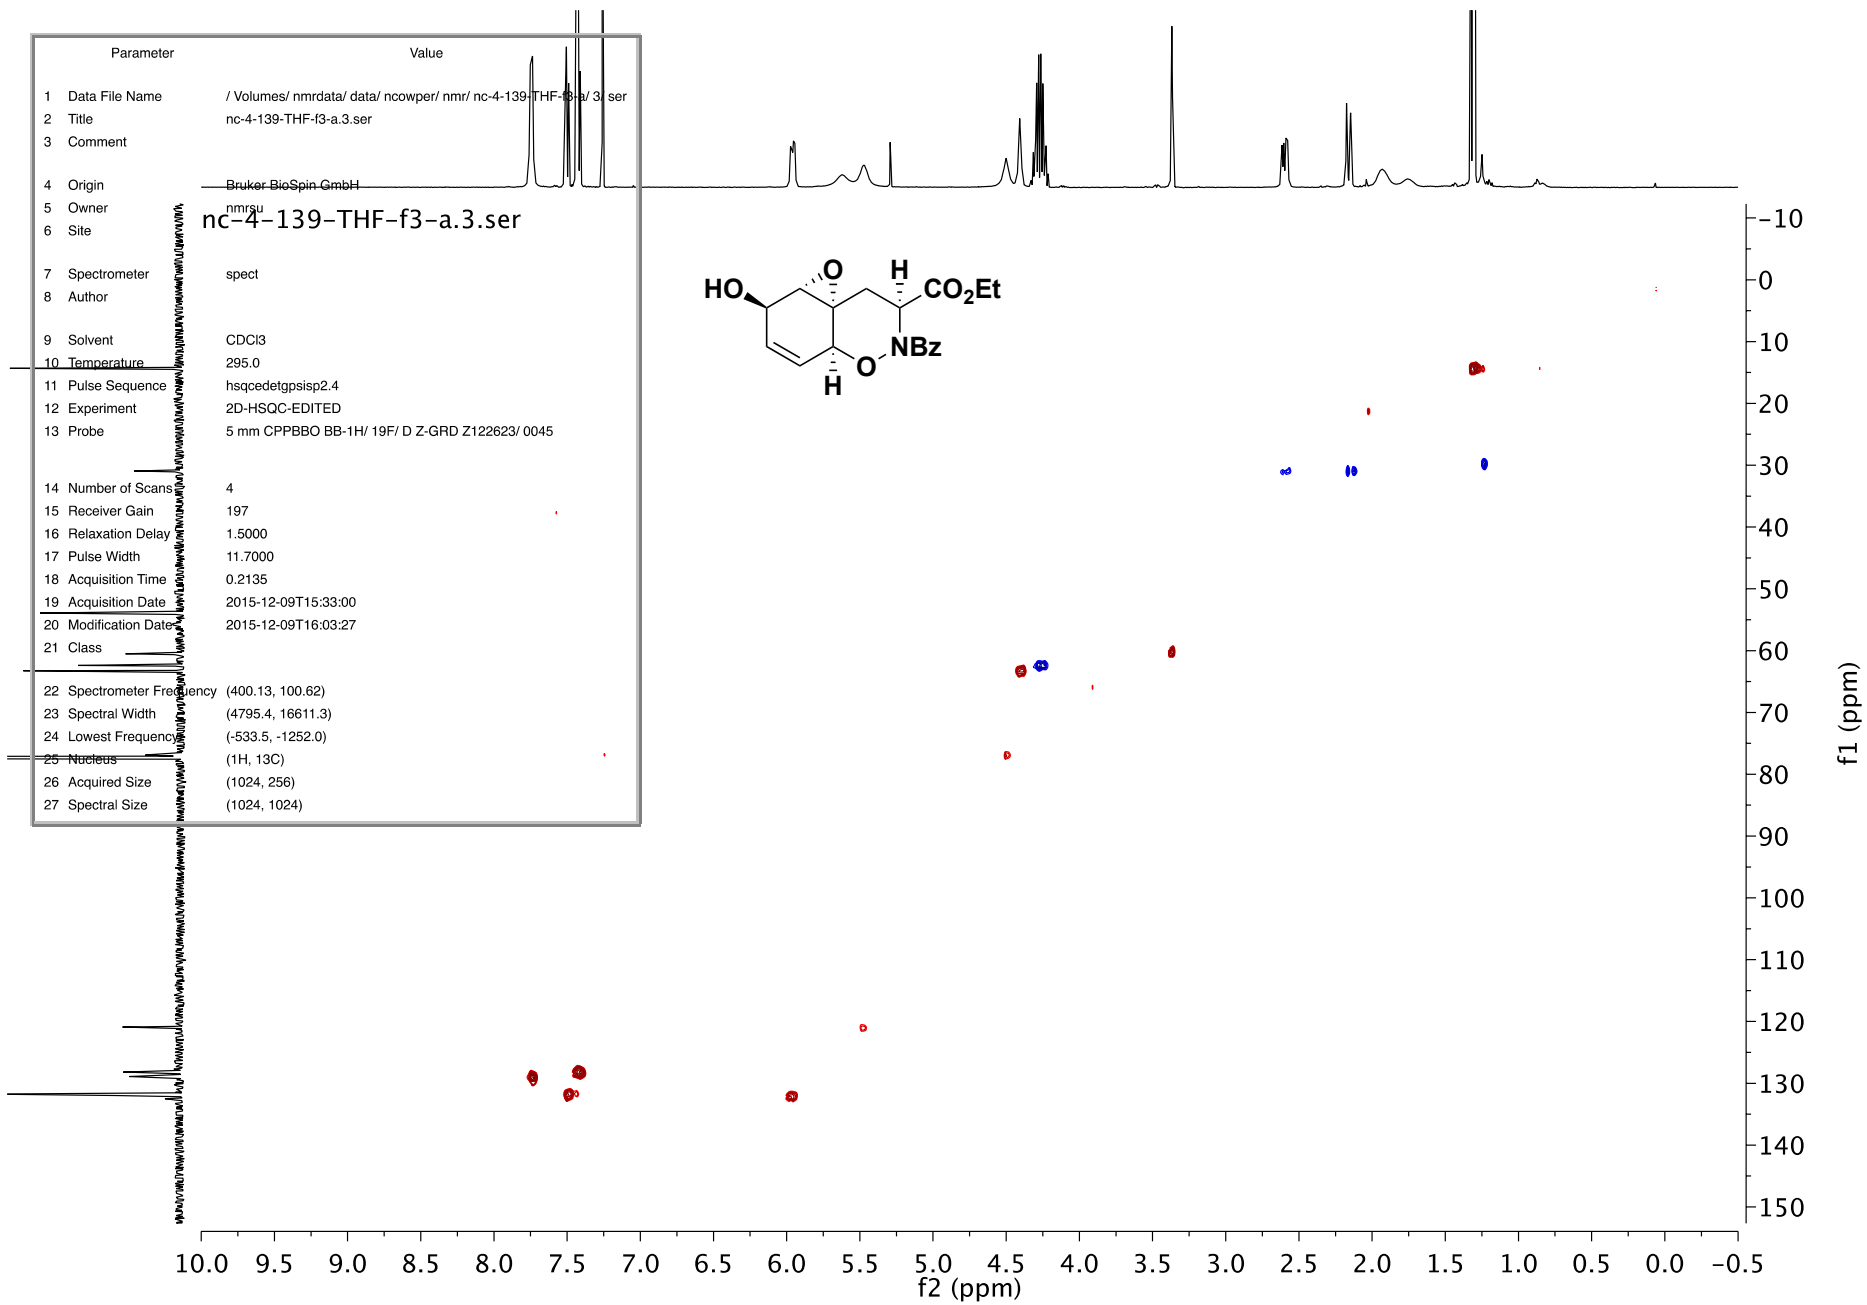

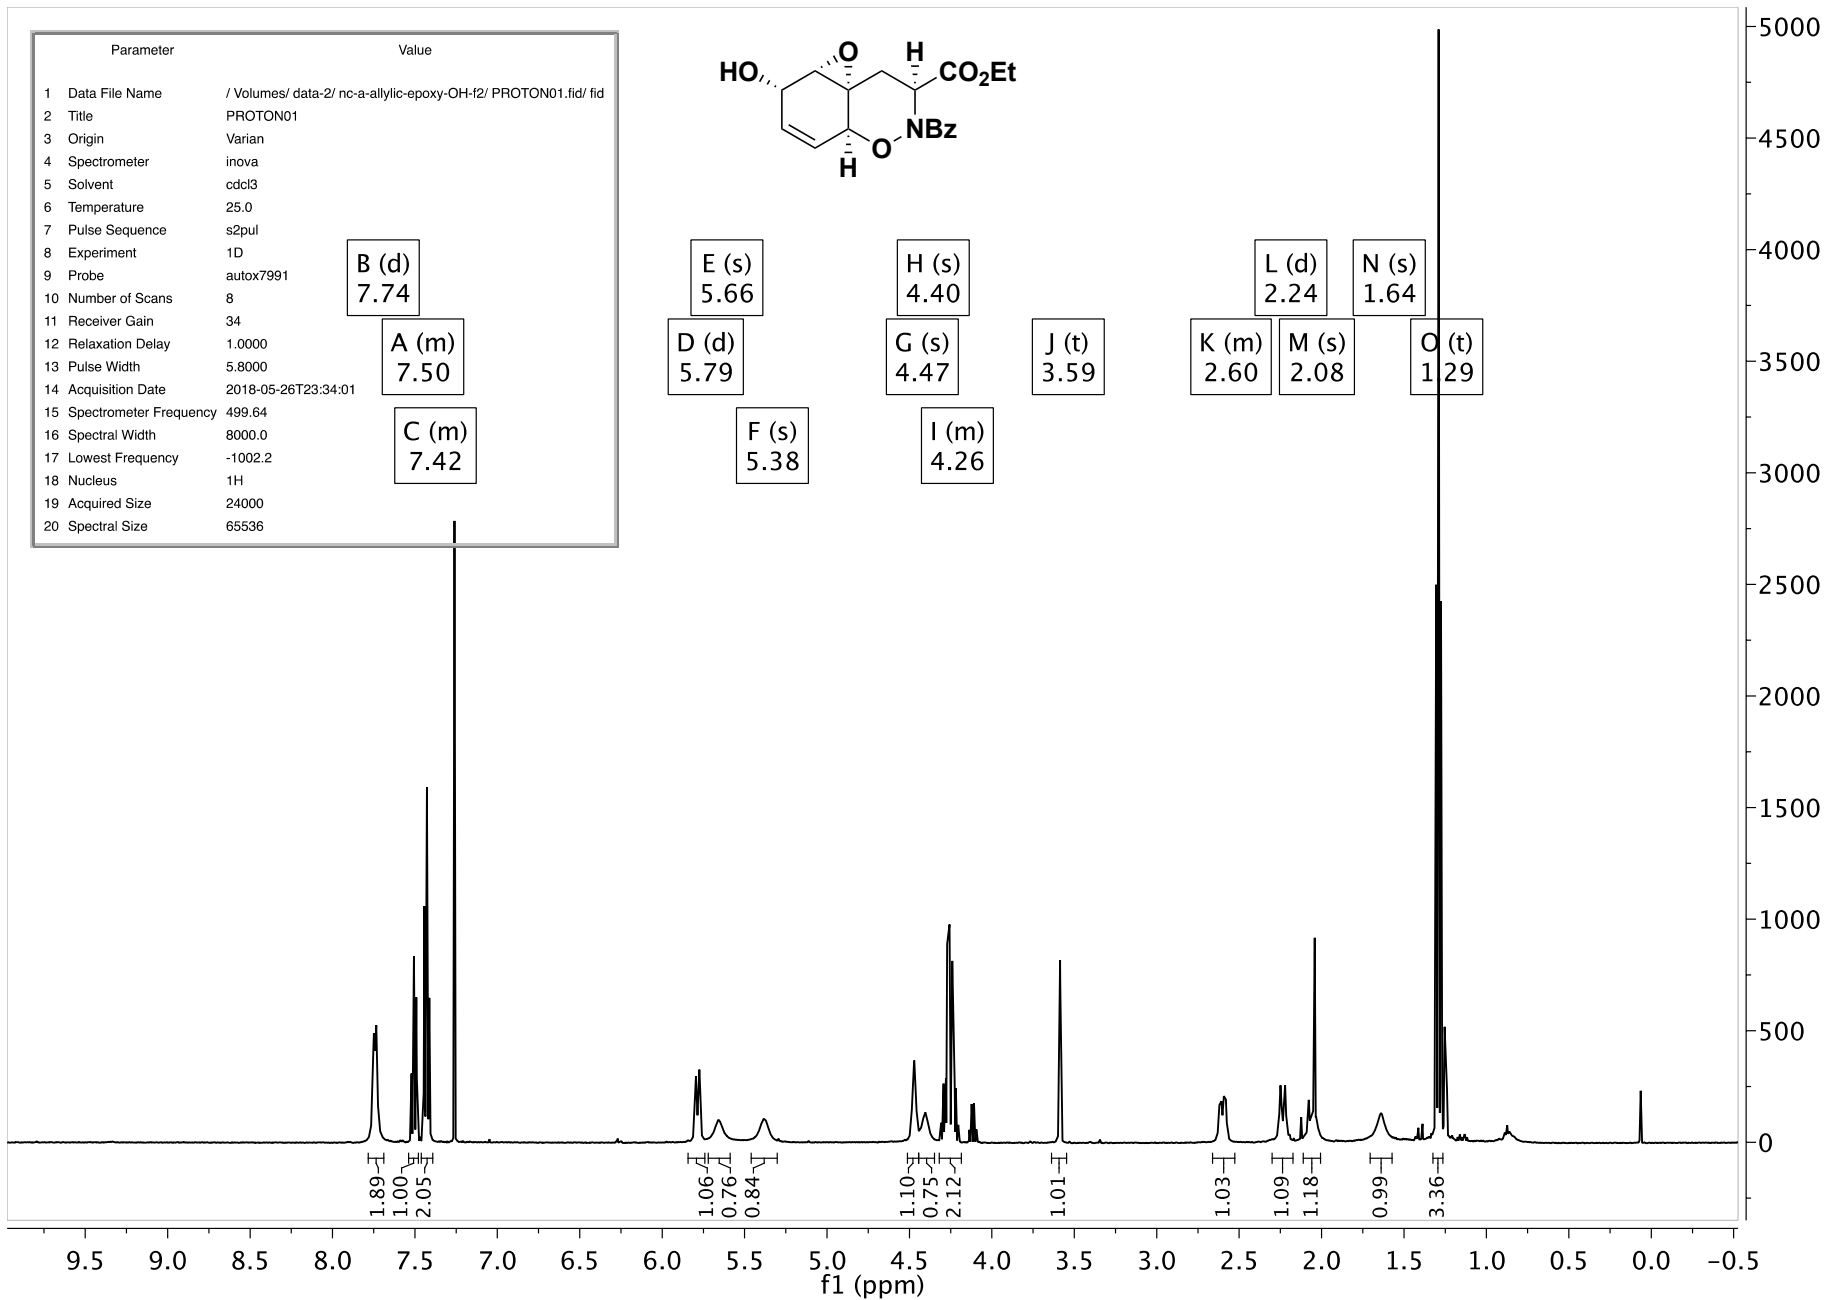

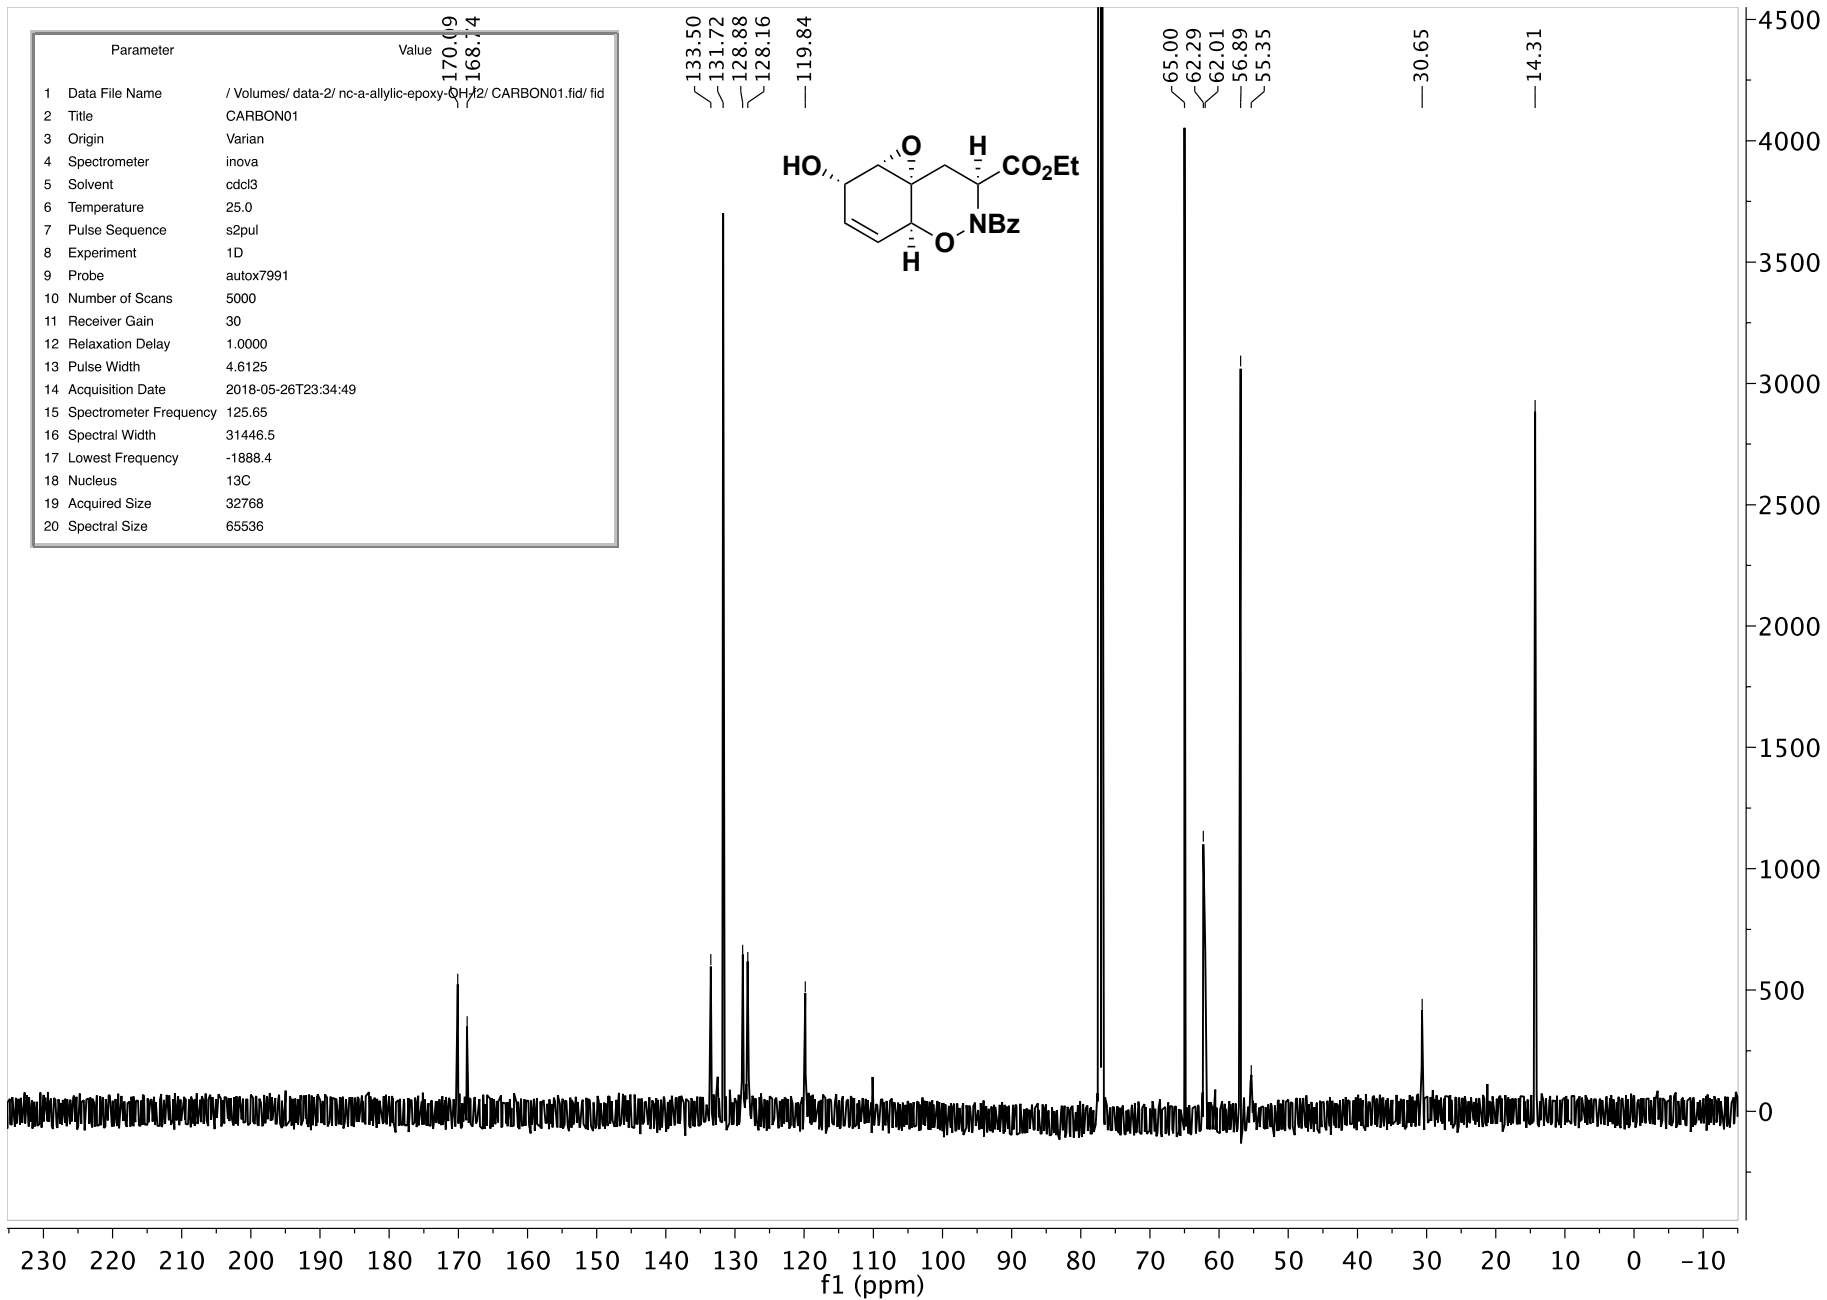

| Parameter                 | Value                                                |
|---------------------------|------------------------------------------------------|
| 1 Data File Name          | /Volumes/nmrdata/data/ncowper/nmr/nc-141-f6-8a/2.ser |
| 2 Title                   | nc-141-f6-8a.2.ser                                   |
| 3 Comment                 |                                                      |
| 4 Origin                  | — Bruker BioSpin GmbH                                |
| 5 Owner                   | nmsu                                                 |
| 6 Site                    | nc-141-f6-8a.2.ser                                   |
| 7 Spectrometer            | spect                                                |
| 8 Author                  |                                                      |
| 9 Solvent                 | CDCl3                                                |
| 10 Temperature            | 294.9                                                |
| 11 Pulse Sequence         | hsqcetgpcisp2.4                                      |
| 12 Experiment             | 2D-HSQC-EDITED                                       |
| 13 Probe                  | 5 mm CPPBBO BB-1H/ 19F/ D Z-GRD Z122623/ 0045        |
| 14 Number of Scans        | 2                                                    |
| 15 Receiver Gain          | 197                                                  |
| 16 Relaxation Delay       | 1.5000                                               |
| 17 Pulse Width            | 11.7000                                              |
| 18 Acquisition Time       | 0.2135                                               |
| 19 Acquisition Date       | 2015-12-14T14:20:00                                  |
| 20 Modification Date      | 2015-12-14T14:35:40                                  |
| 21 Class                  |                                                      |
| 22 Spectrometer Frequency | (400.13, 100.62)                                     |
| 23 Spectral Width         | (4795.4, 16611.3)                                    |
| 24 Lowest Frequency       | (-528.7, -1250.0)                                    |
| 25 Nucleus                | (1H, 13C)                                            |
| 26 Acquired Size          | (1024, 256)                                          |
| 27 Spectral Size          | (1024, 1024)                                         |

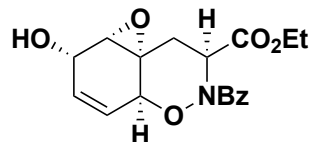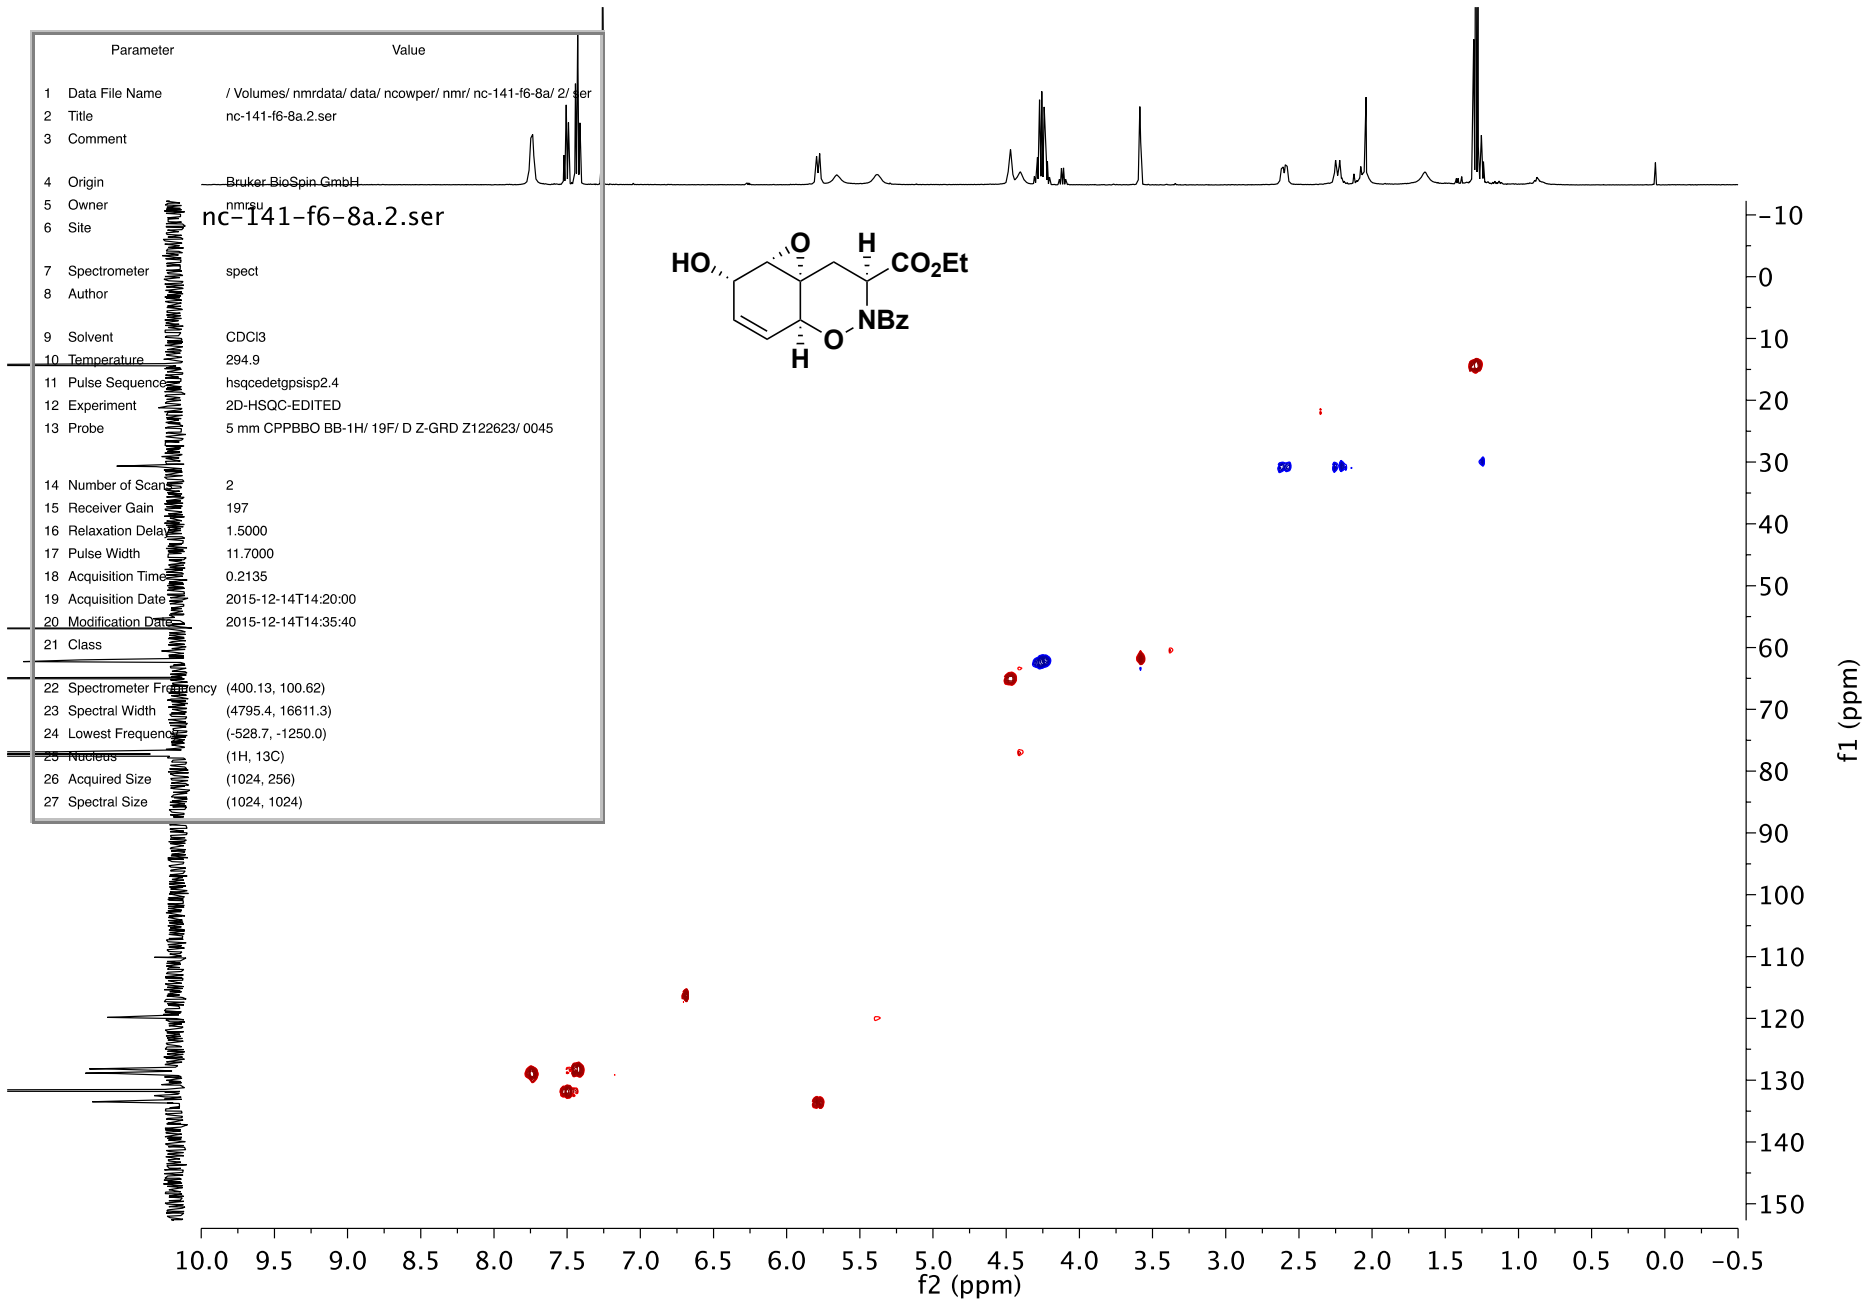

Supplement: d0sc04802j1.pdf [file d0sc04802j1.pdf]
